# Supplementary material for: Elucidation of the glycosylation steps during biosynthesis of antitumor macrolides PM100117 and PM100118 and engineering for novel derivatives
Source: PubMed Central journal article supplement (PMC5103430; doi:10.1186/s12934-016-0591-7), 2016-11-09

**Fig. S2.** Effect of *gonR2* over-expression on PM100117/18 biosynthesis. Strains GUA-pSETH (control) and OE*gonR2* (pC*gonR2*) were analyzed for PM100117 (**1**) and PM100118 (**2**) production by UPLC.

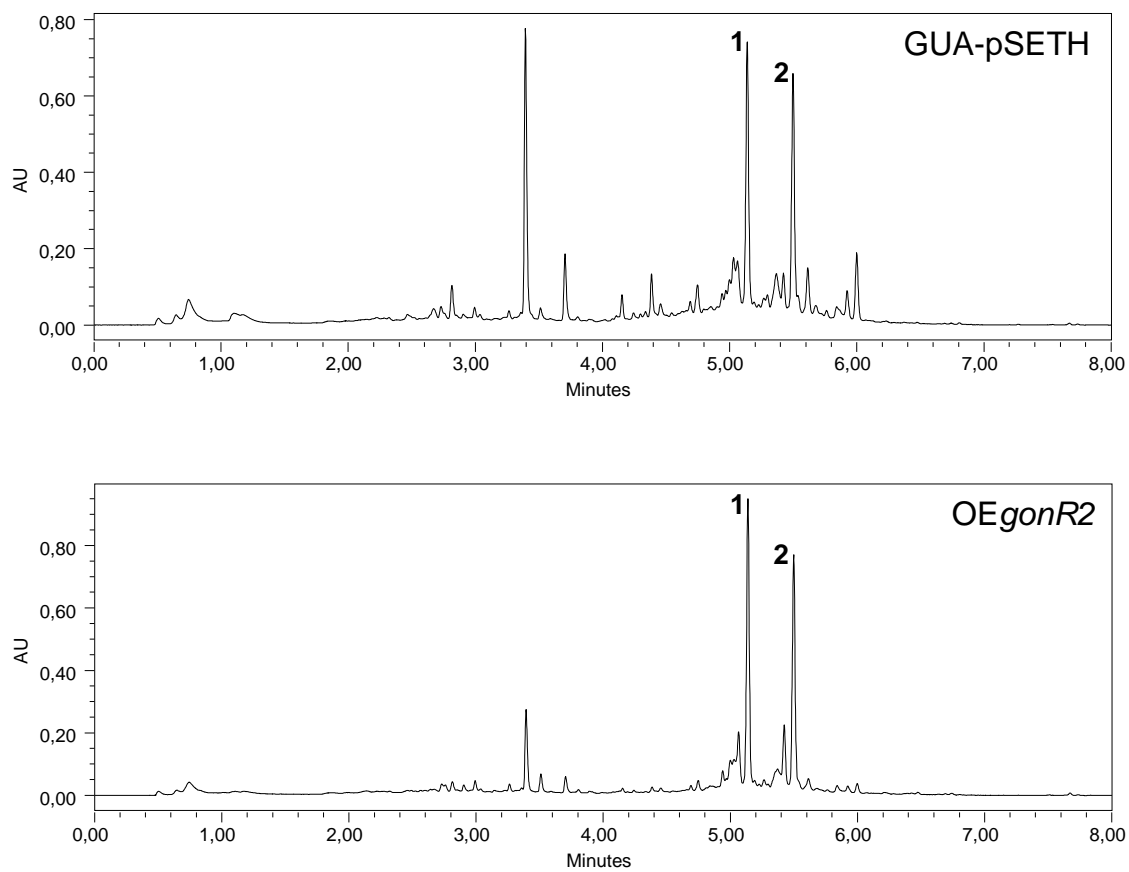

**Fig. S3.** Effects of *gonG4* over-expression on *S. caniferus* GUA-06-05-006A and  $\Delta$ *gonG2*. A) UPLC analysis of PM100117/18 production in strains GUA-pSETH and OE*gonG4*. B) UPLC analysis of the effect of *gonG4* over-expression in strain  $\Delta$ *gonG2*.

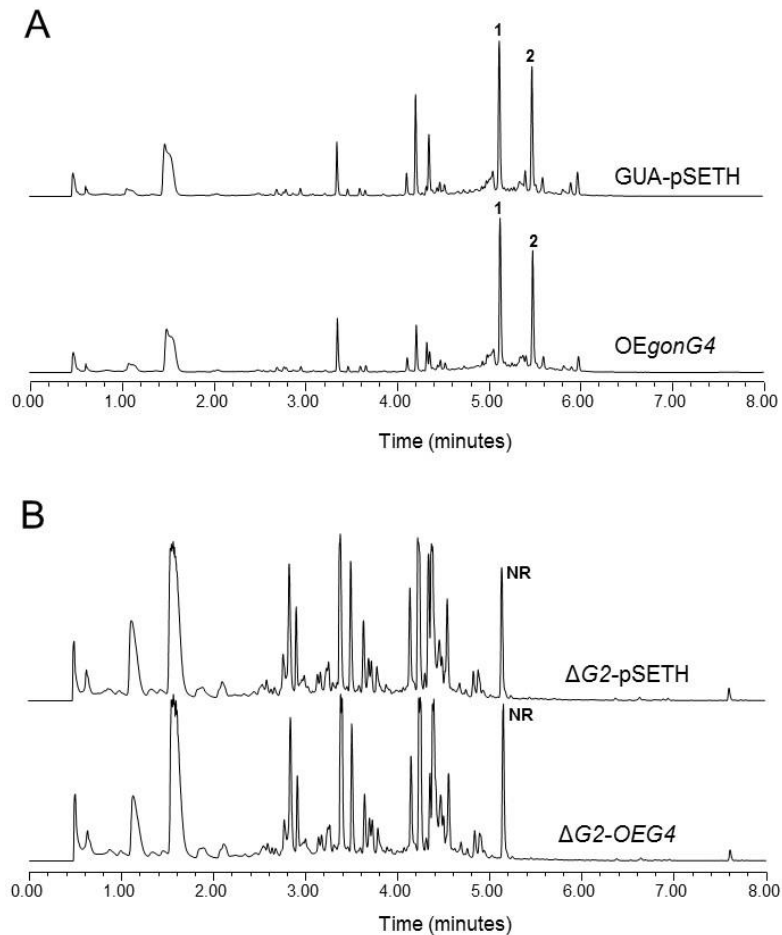

### Methods: Feeding experiment

Plamids pSETH and pC-*gonG4* were transfer into *Streptomyces albus* J1074 by intergeneric conjugation yielding strains SA-pSETH and SA-OEG4, which were cultivated in TSB medium for 24 h at 30°C and 200 rpm. Each one of these seed cultures was used to inoculate (2% v/v) two 250-ml flasks containing 25 ml of R5A medium (sucrose, 100 g/liter; K<sub>2</sub>SO<sub>4</sub>, 0.25 g/liter; MgCl<sub>2</sub> · 6H<sub>2</sub>O, 10.12 g/liter; glucose,

10 g/liter; Casamino Acids, 0.1 g/liter; yeast extract, 5 g/liter; and MOPS, 21 g/liter). After 24 h of cultivation a pulse feeding with 100% methanol (control) or 200ug of PM100118 in methanol was started. The culture was then left in agitation for additional 8 h before the first sample extraction (3 ml), which was continued by additional sample collection 24, 48 and 72 h after the pulse. Samples were extracted with 3 ml of ethyl acetate as described in methods and analyzed by HPLC/MS to detect the appearance of PM100118 derivatives carrying glucose subunits.

**Fig. S4.** Heterologous expression of *gonG4* in *Streptomyces albus* J1074 and feeding with PM100118. Strains SA-pSETH and SA-OEG4 were fed with PM100118 or methanol, samples were taken at A) 8 h, B) 24 h, C) 48 h and 72 h, and analyzed by HPLC/MS. The peak labeled with an *asterisk* corresponds to a PM100118 (2) shunt product that was co-purified with the respective parental compound. *PD* is a differential peak corresponding to the *S. albus* J1074 natural product paulomycin D.

A

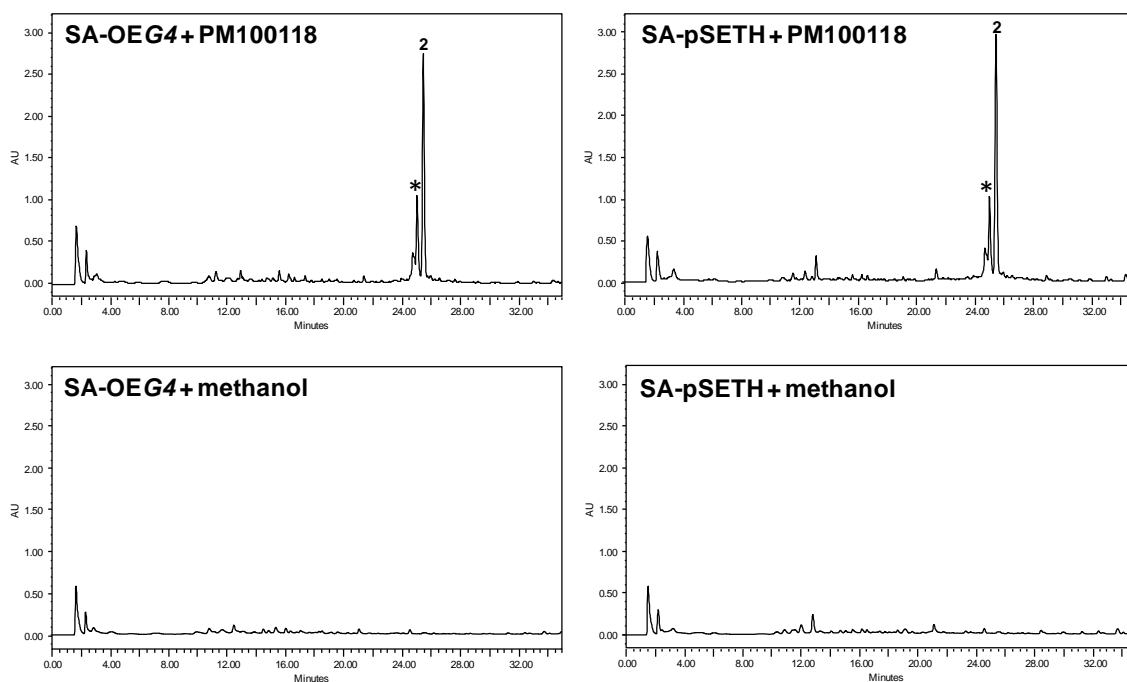

B

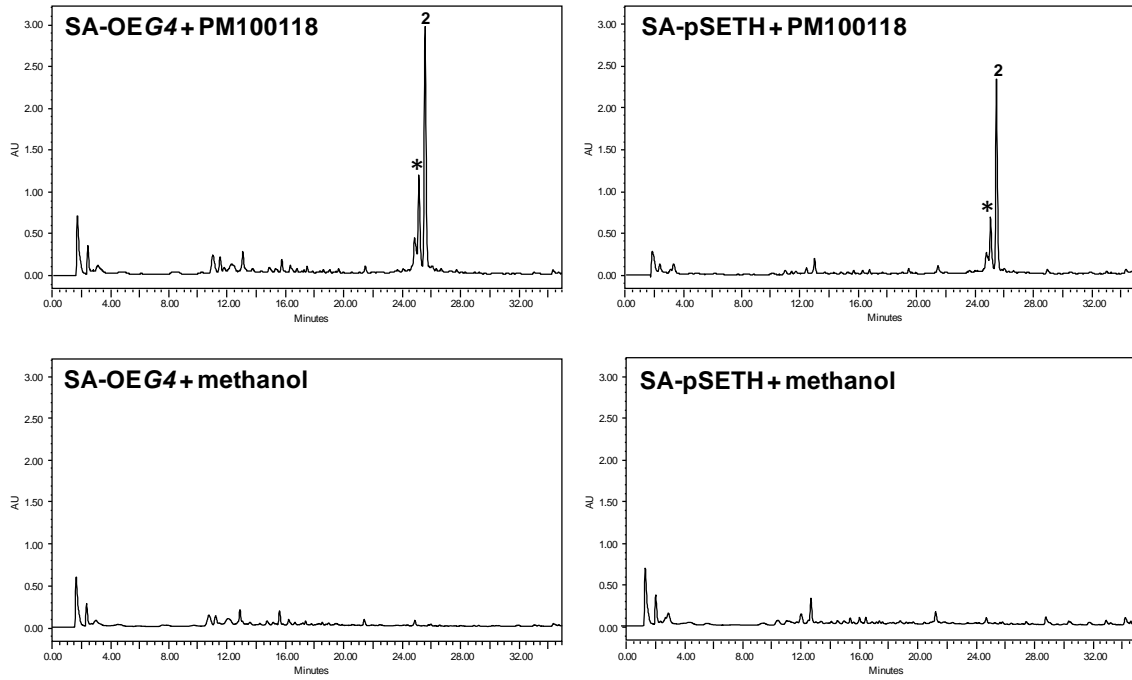

C

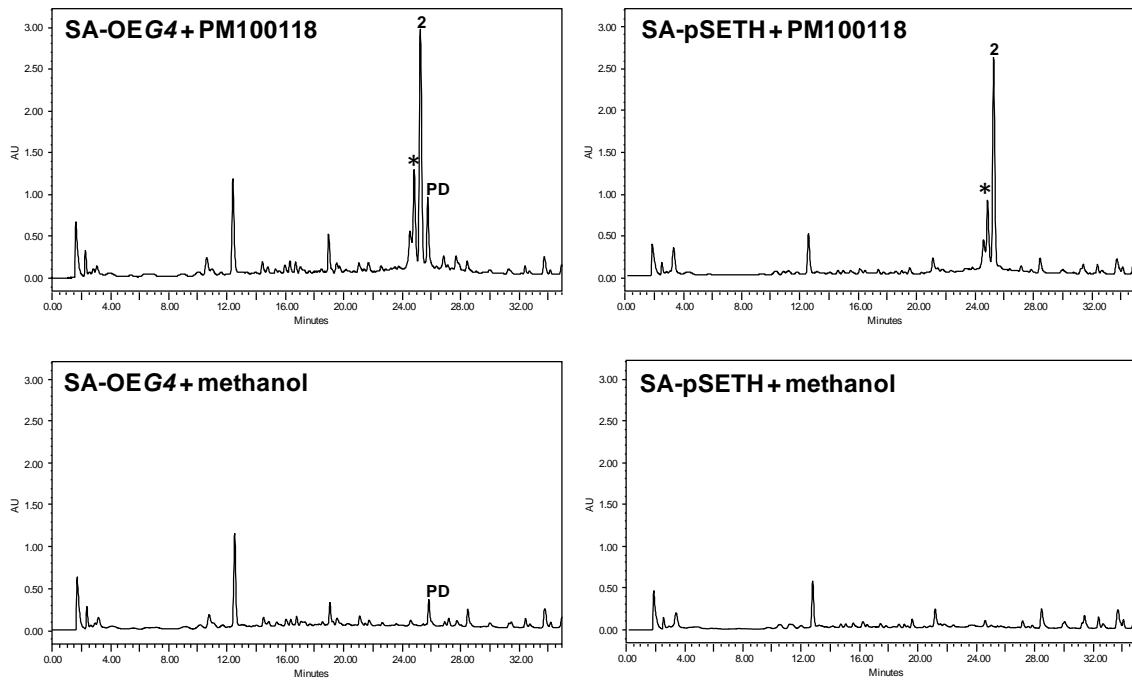

D

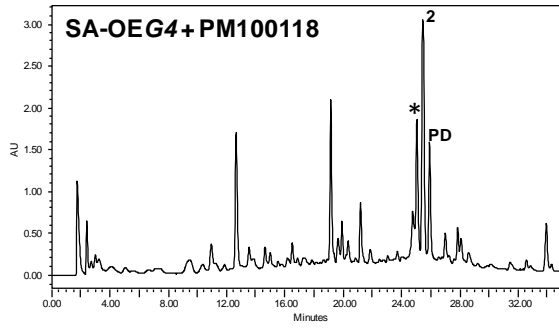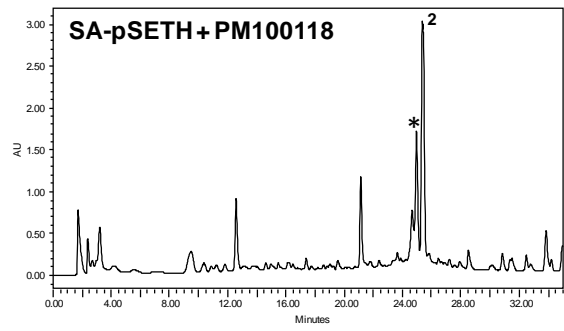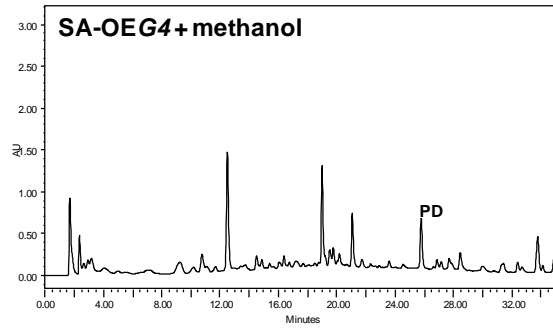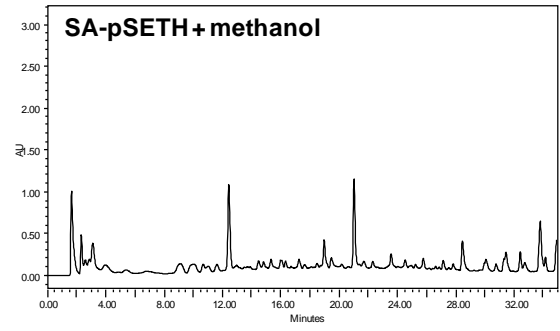

Supplement: 12934_2016_591_MOESM3_ESM.pdf [file 12934_2016_591_MOESM3_ESM.pdf]
