# Supplementary material for: Elucidation of the glycosylation steps during biosynthesis of antitumor macrolides PM100117 and PM100118 and engineering for novel derivatives
Source: PubMed Central journal article supplement (PMC5103430; doi:10.1186/s12934-016-0591-7), 2016-11-09
Supplement: 12934_2016_591_MOESM2_ESM.pdf [file 12934_2016_591_MOESM2_ESM.pdf]

**Fig. S1.** Mass and NMR spectra of compounds **3-13**.  $^1\text{H}$  ( $\text{CD}_3\text{OD}$ , 500 MHz for  $^1\text{H}$  and 125 MHz for  $^{13}\text{C}$ ) and MS spectra of compounds **3-13**. TOCSY and ROESY spectra of compounds **3**, **5** and **10-13**.  $^{13}\text{C}$  ( $\text{CD}_3\text{OD}$ , 500 MHz for  $^1\text{H}$  and 125 MHz for  $^{13}\text{C}$ ), gCOSY, gHSQC and gHMBC spectra of compounds **3** and **10-13**.

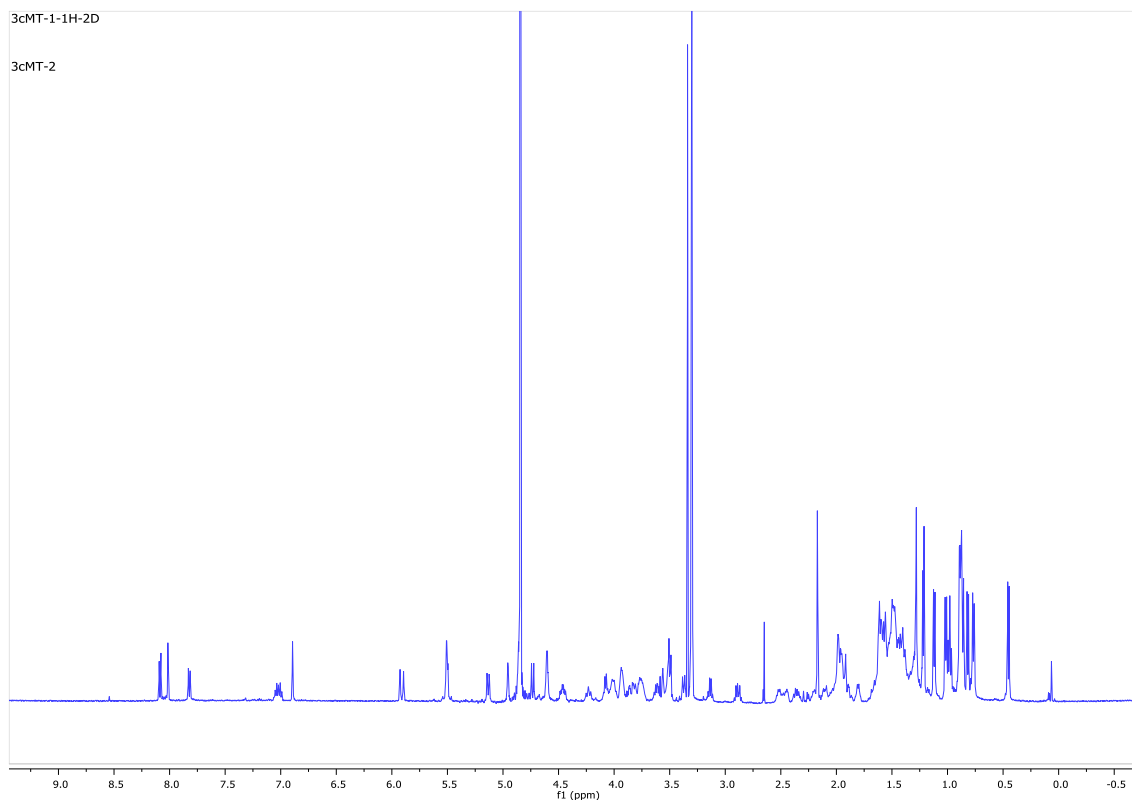

$^1\text{H}$  spectrum of **3** ( $\text{CD}_3\text{OD}$ , 500 MHz for  $^1\text{H}$  and 125 MHz for  $^{13}\text{C}$ )

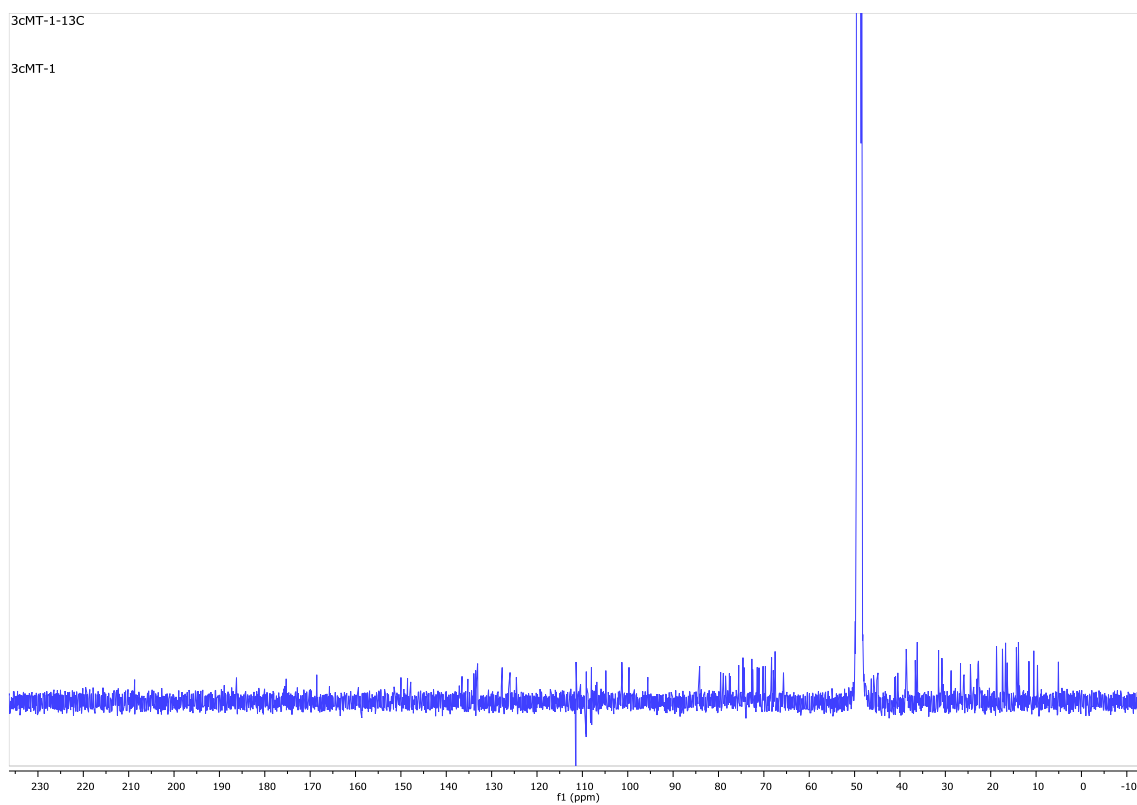

$^{13}\text{C}$  spectrum of **3** ( $\text{CD}_3\text{OD}$ , 500 MHz for  $^1\text{H}$  and 125 MHz for  $^{13}\text{C}$ )

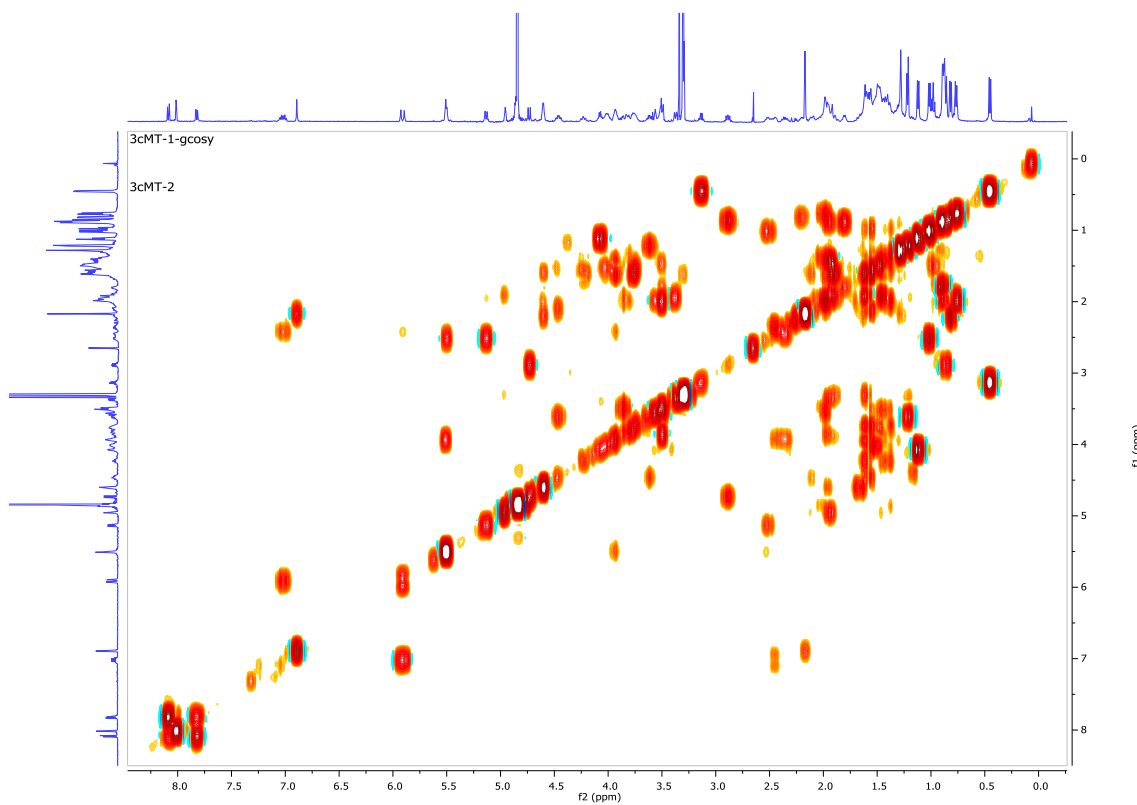

gCOSY spectrum of **3** ( $\text{CD}_3\text{OD}$ , 500 MHz for  $^1\text{H}$  and 125 MHz for  $^{13}\text{C}$ )

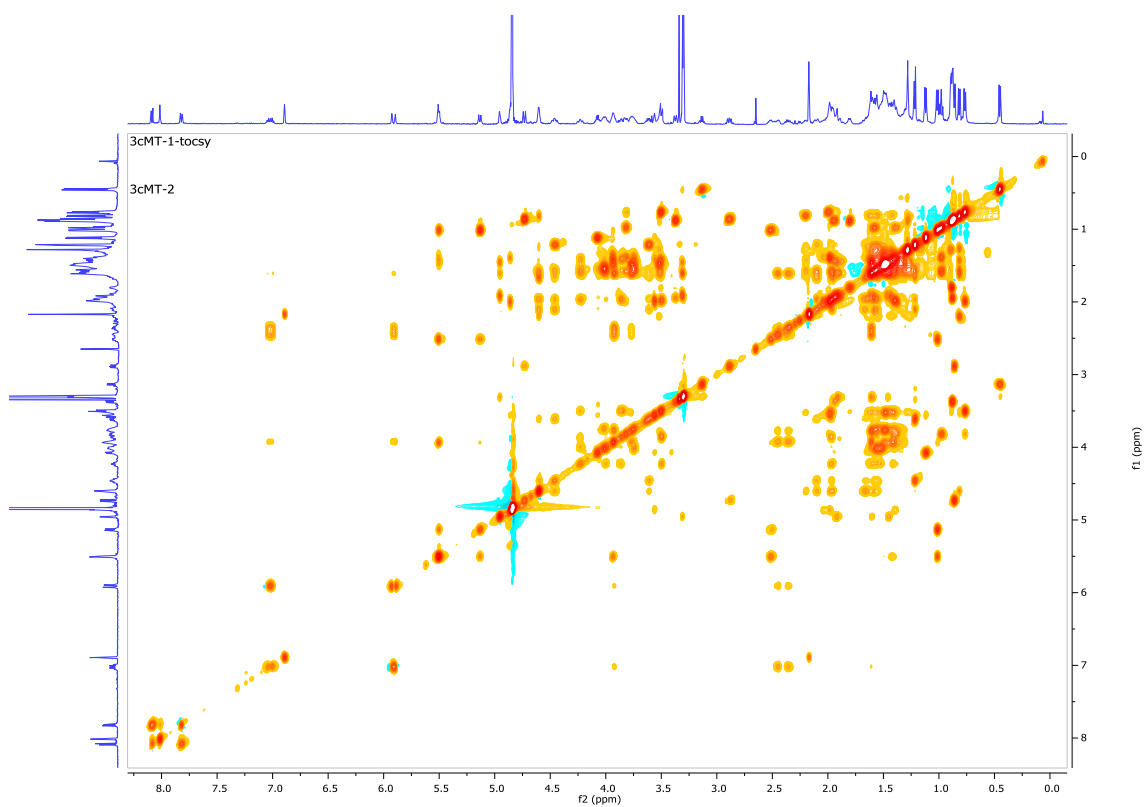

TOCSY spectrum of **3** (CD<sub>3</sub>OD, 500 MHz for <sup>1</sup>H and 125 MHz for <sup>13</sup>C)

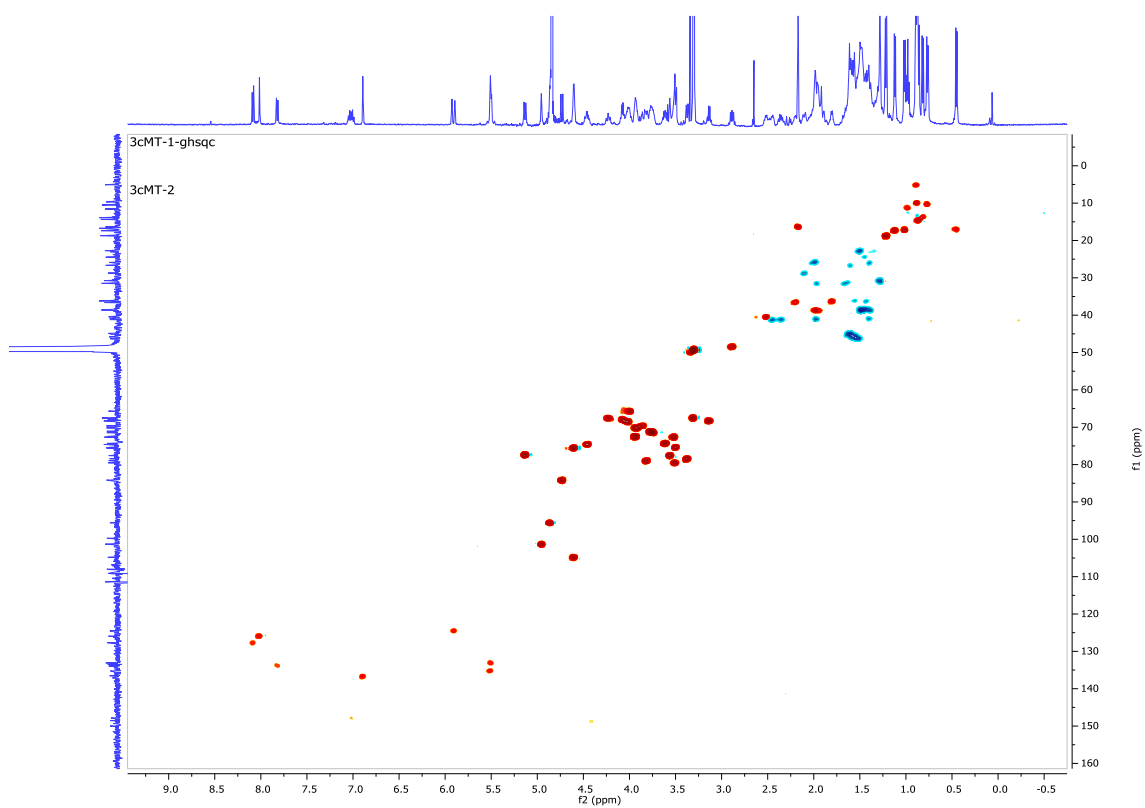

gHSQC spectrum of **3** (CD<sub>3</sub>OD, 500 MHz for <sup>1</sup>H and 125 MHz for <sup>13</sup>C)

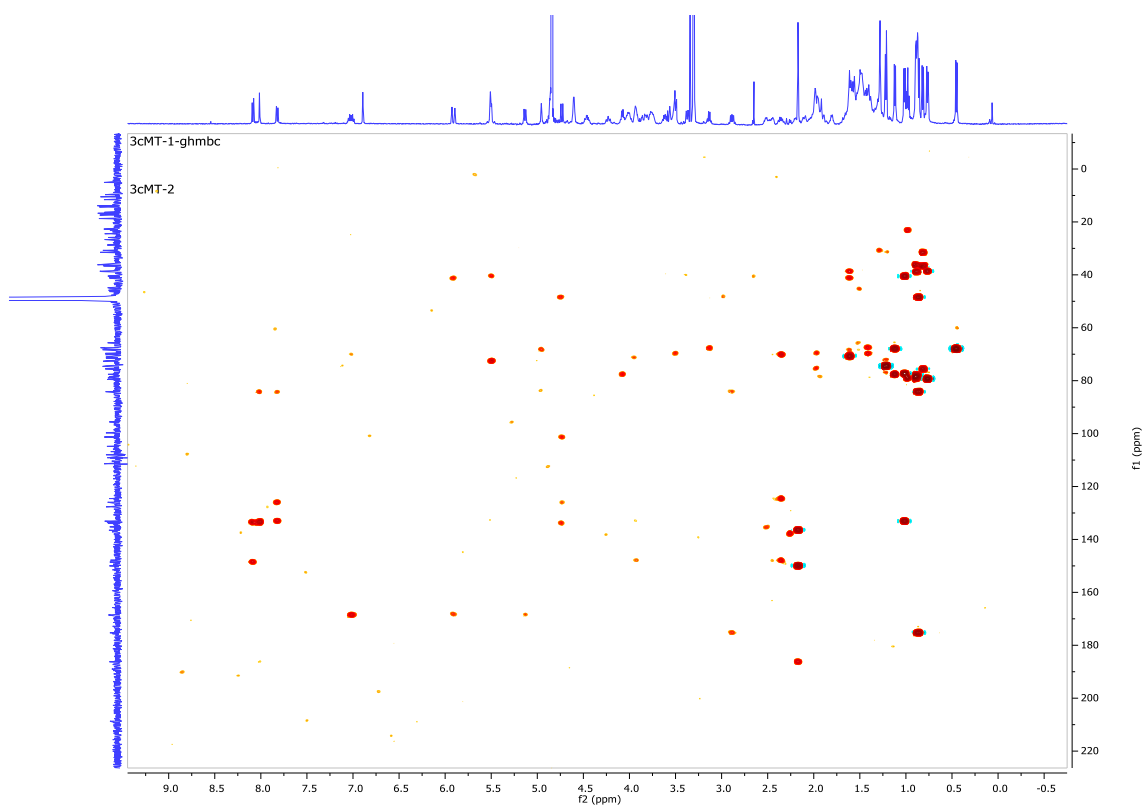

gHMBC spectrum of **3** (CD<sub>3</sub>OD, 500 MHz for <sup>1</sup>H and 125 MHz for <sup>13</sup>C)

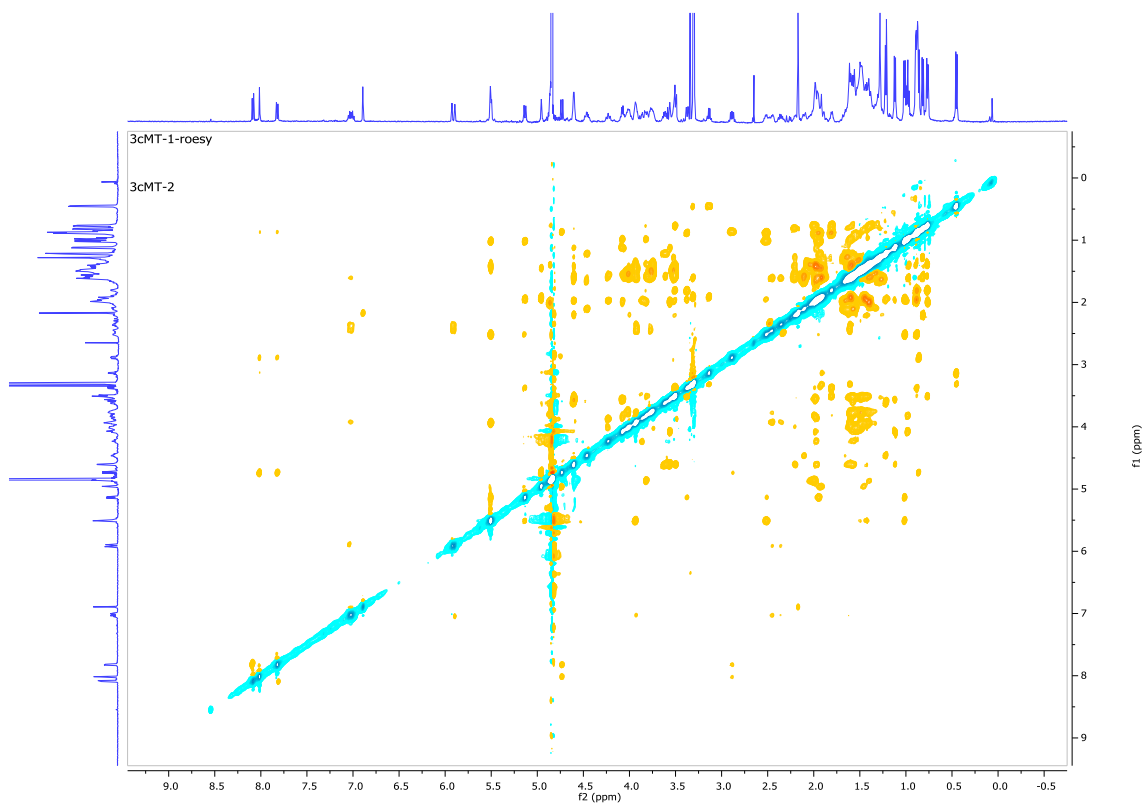

ROESY spectrum of **3** (CD<sub>3</sub>OD, 500 MHz for <sup>1</sup>H and 125 MHz for <sup>13</sup>C)

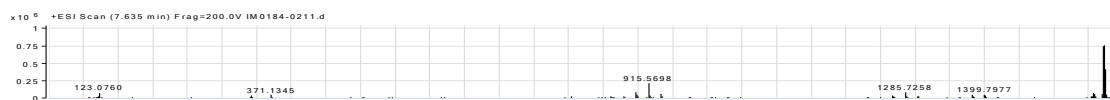

MS spectrum of **3**

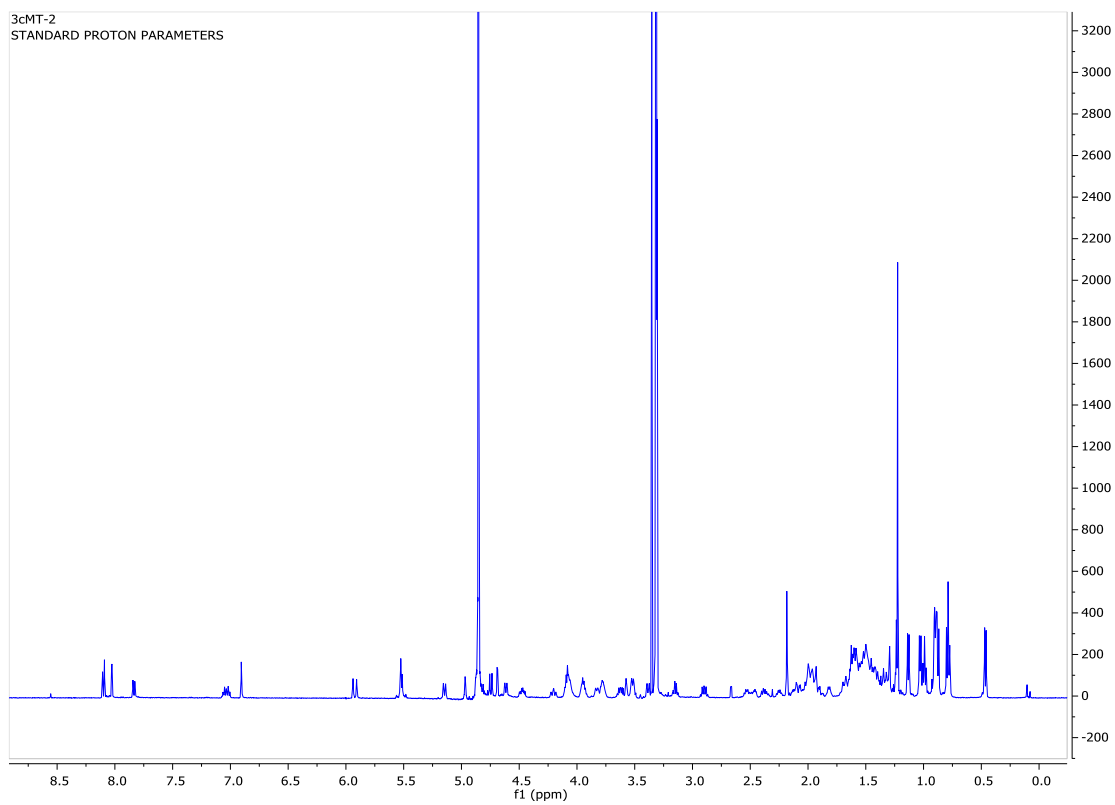

$^1\text{H}$  spectrum of **4** ( $\text{CD}_3\text{OD}$ , 500 MHz for  $^1\text{H}$  and 125 MHz for  $^{13}\text{C}$ )

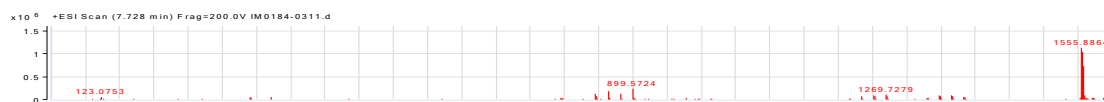

MS spectrum of **4**

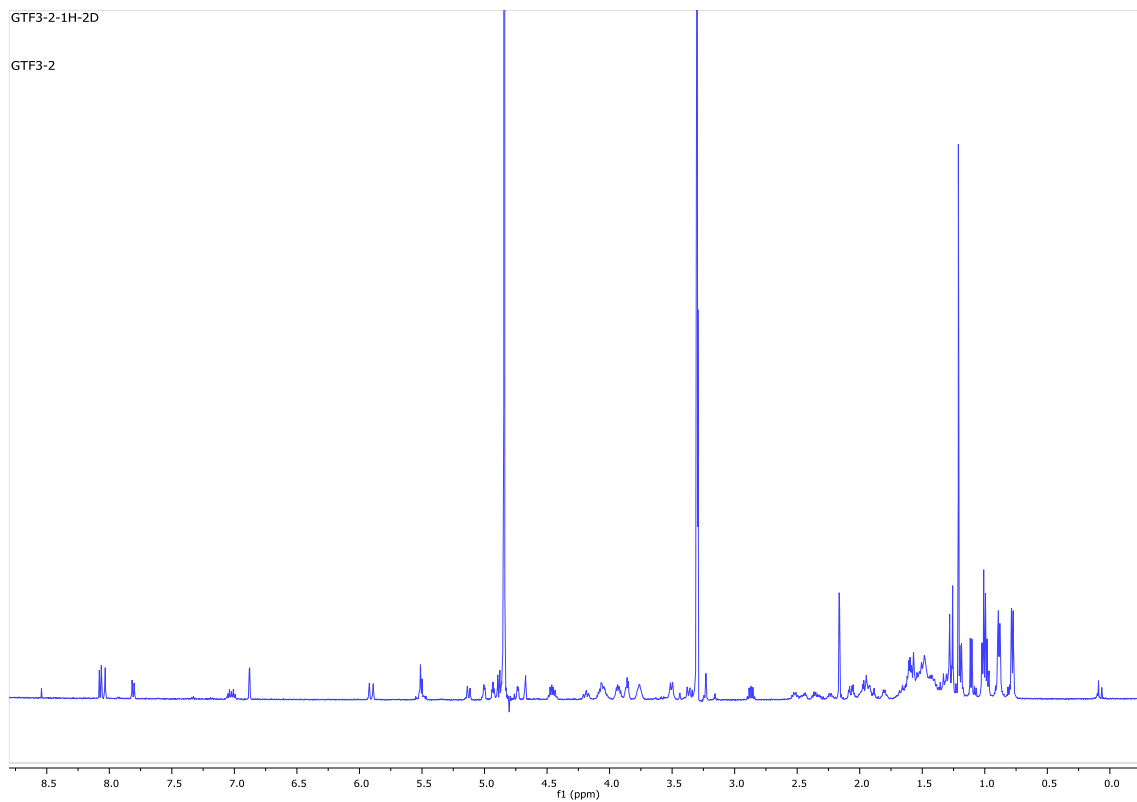

$^1\text{H}$  spectrum of **5** ( $\text{CD}_3\text{OD}$ , 500 MHz for  $^1\text{H}$  and 125 MHz for  $^{13}\text{C}$ )

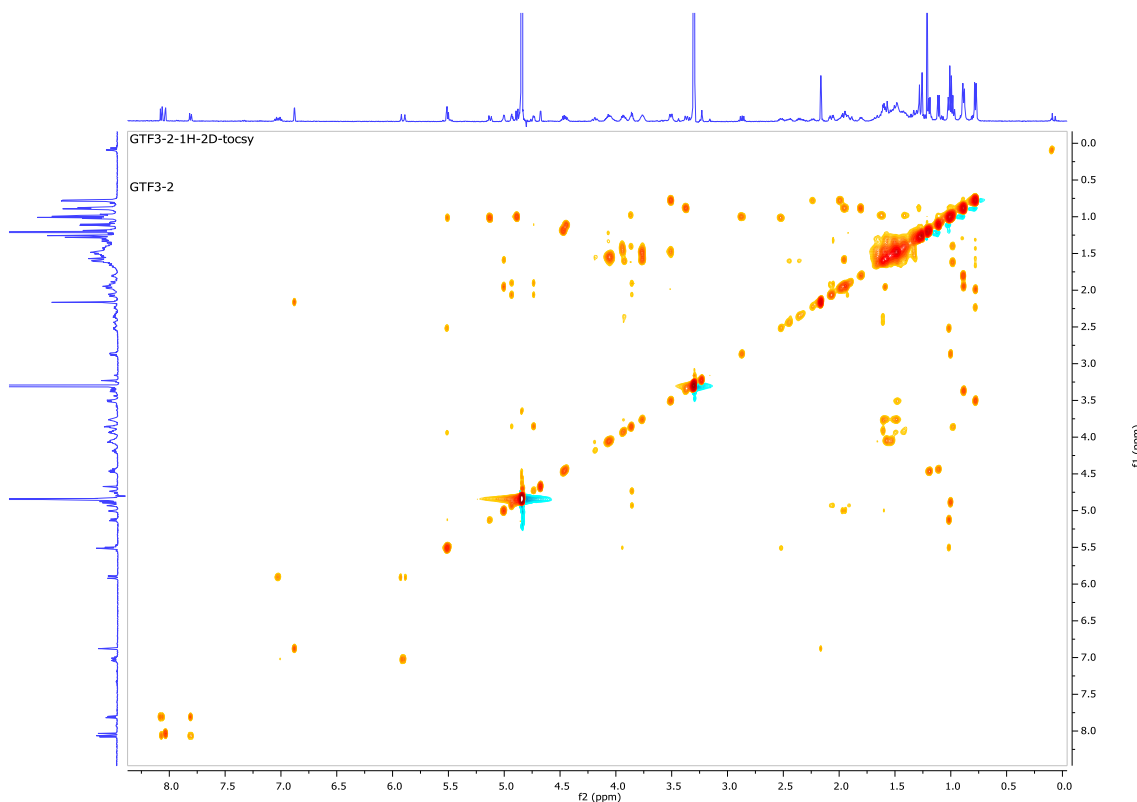

TOCSY spectrum of **5** ( $\text{CD}_3\text{OD}$ , 500 MHz for  $^1\text{H}$  and 125 MHz for  $^{13}\text{C}$ )

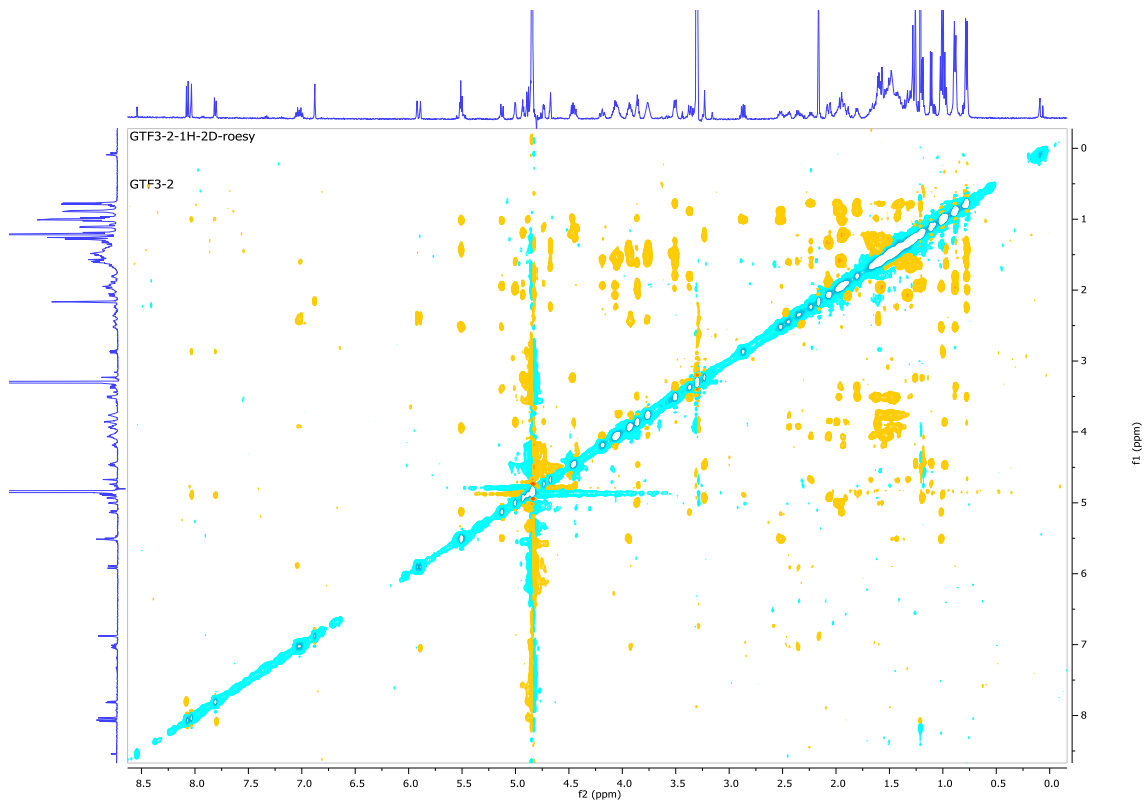

ROESY spectrum of **5** (CD<sub>3</sub>OD, 500 MHz for <sup>1</sup>H and 125 MHz for <sup>13</sup>C)

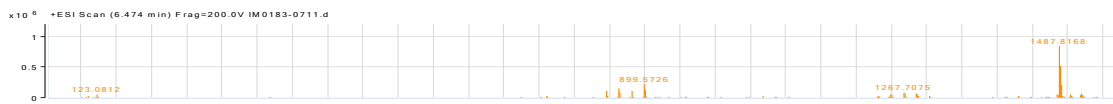

MS spectrum of **5**

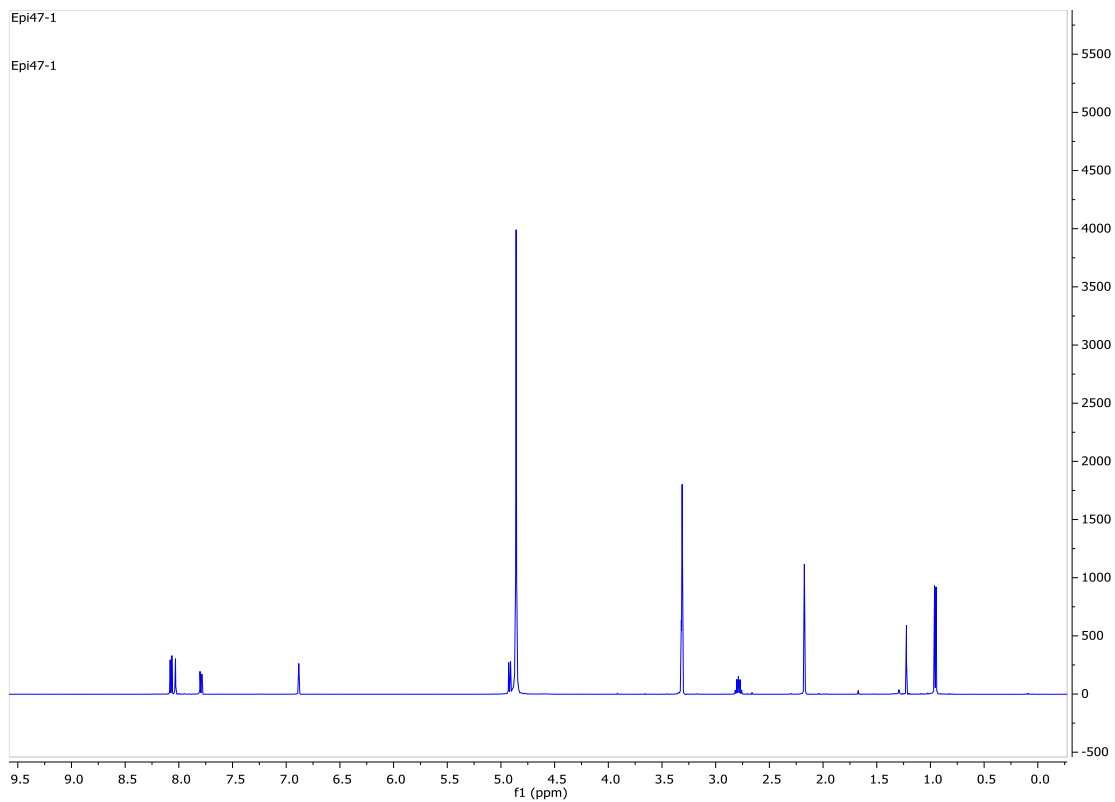

<sup>1</sup>H spectrum of **6** (CD<sub>3</sub>OD, 500 MHz for <sup>1</sup>H and 125 MHz for <sup>13</sup>C)

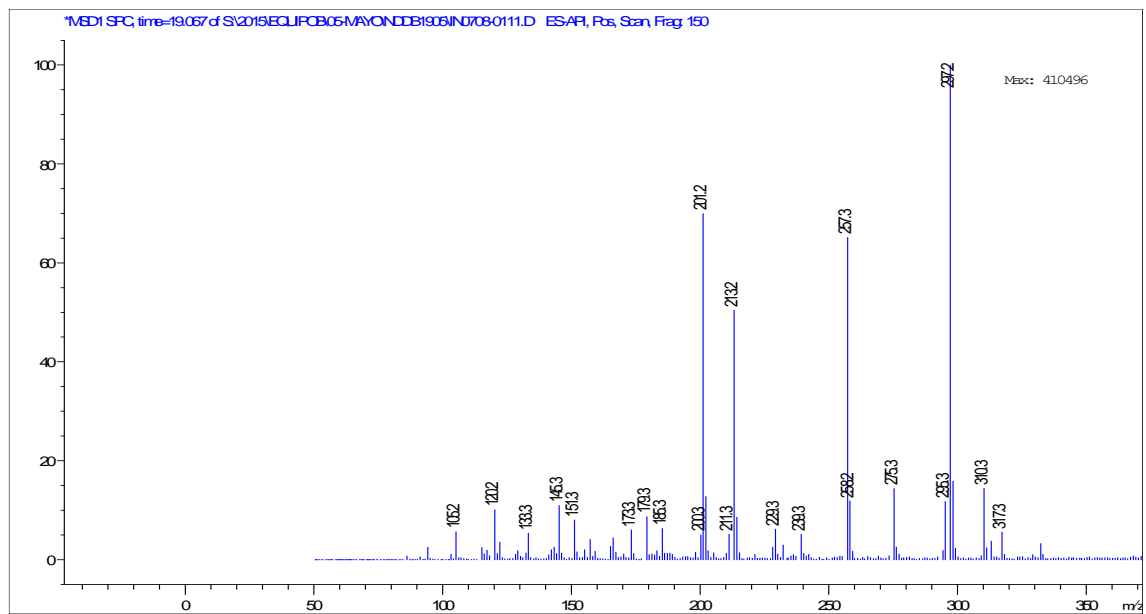

MS spectrum of **6**



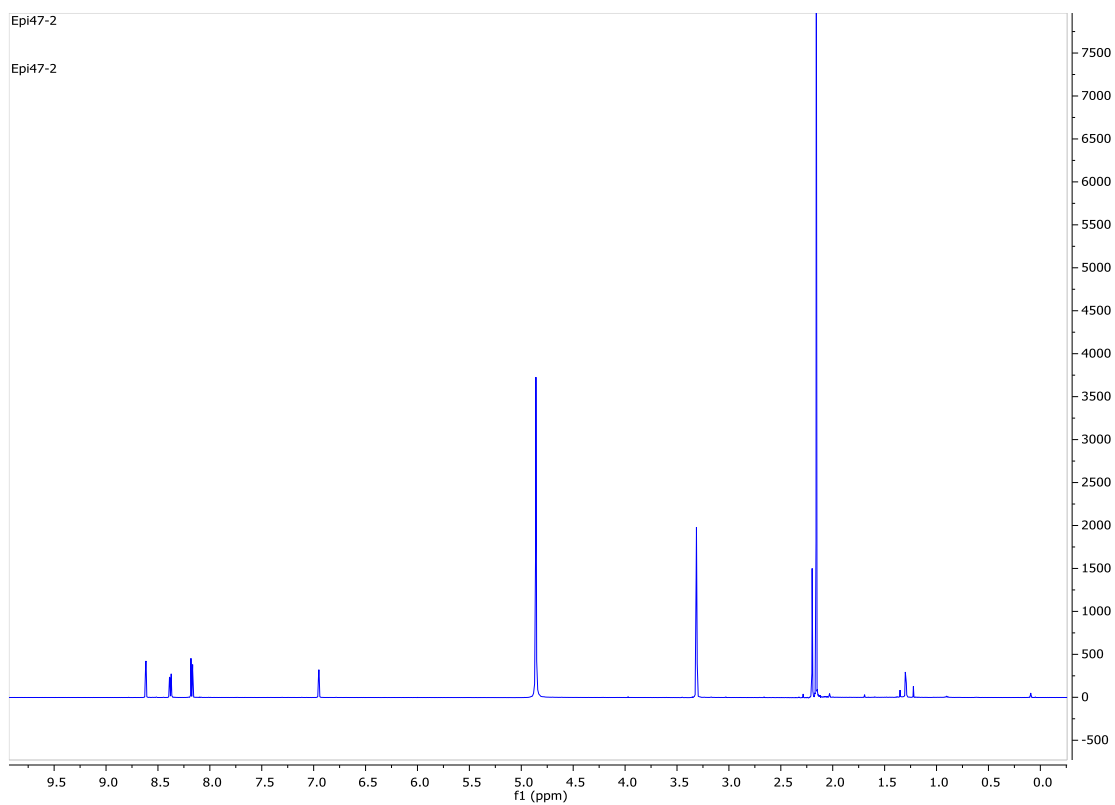

<sup>1</sup>H spectrum of **7** (CD<sub>3</sub>OD, 500 MHz for <sup>1</sup>H and 125 MHz for <sup>13</sup>C)

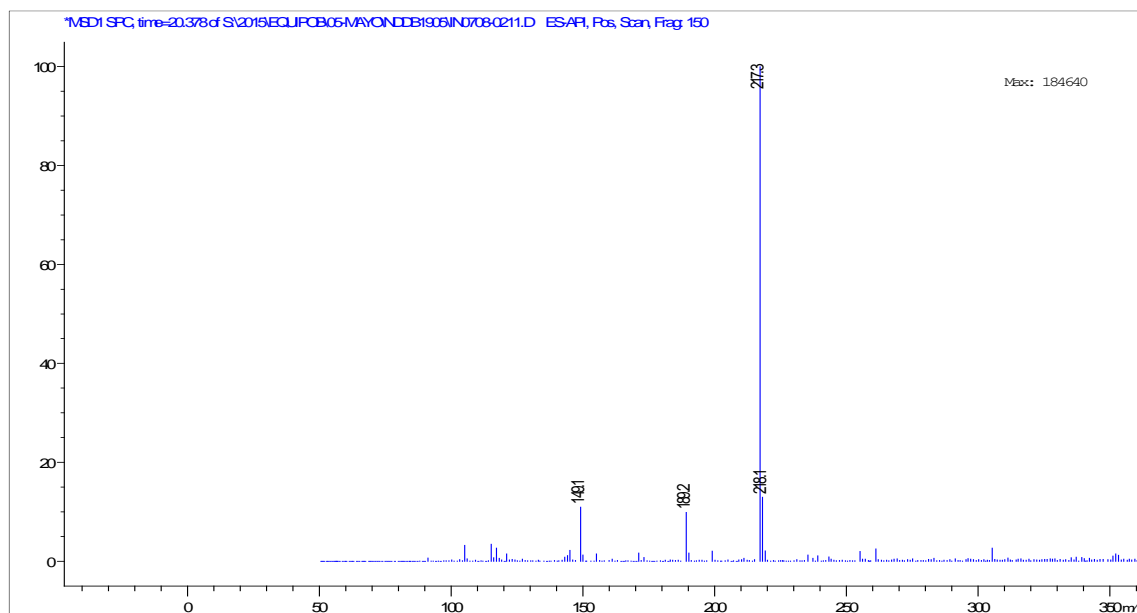

MS spectrum of **7**

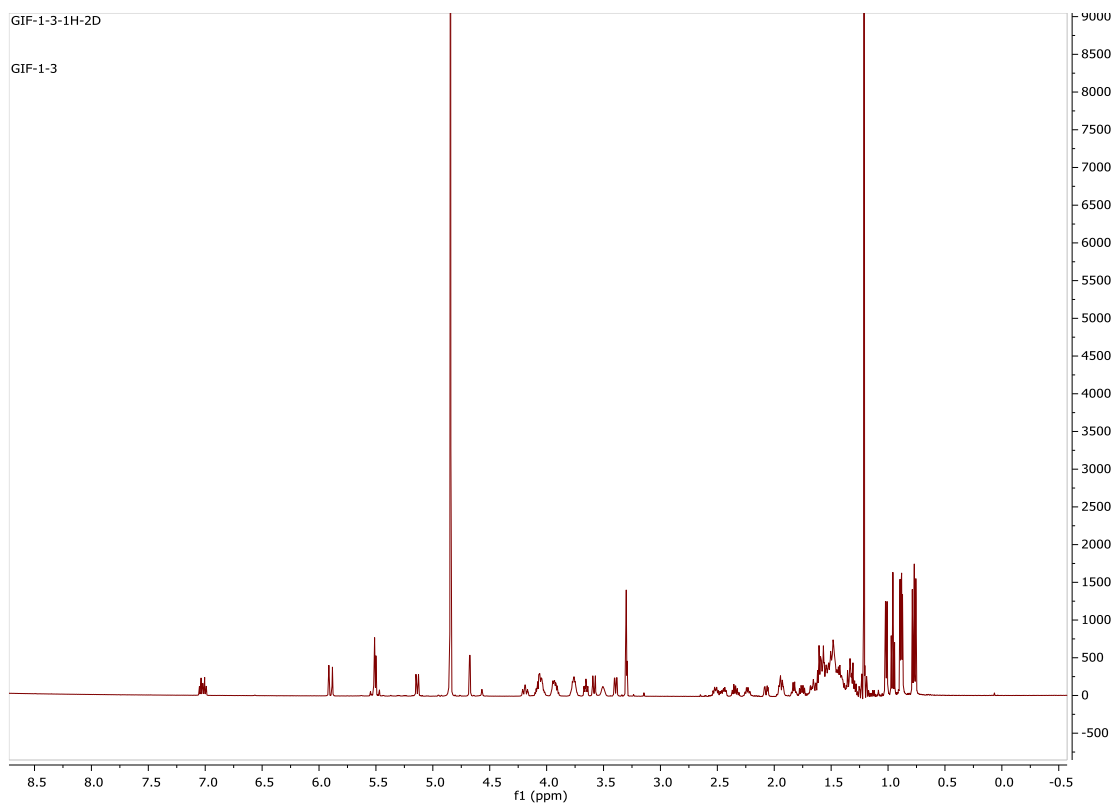

$^1\text{H}$  spectrum of **10** ( $\text{CD}_3\text{OD}$ , 500 MHz for  $^1\text{H}$  and 125 MHz for  $^{13}\text{C}$ )

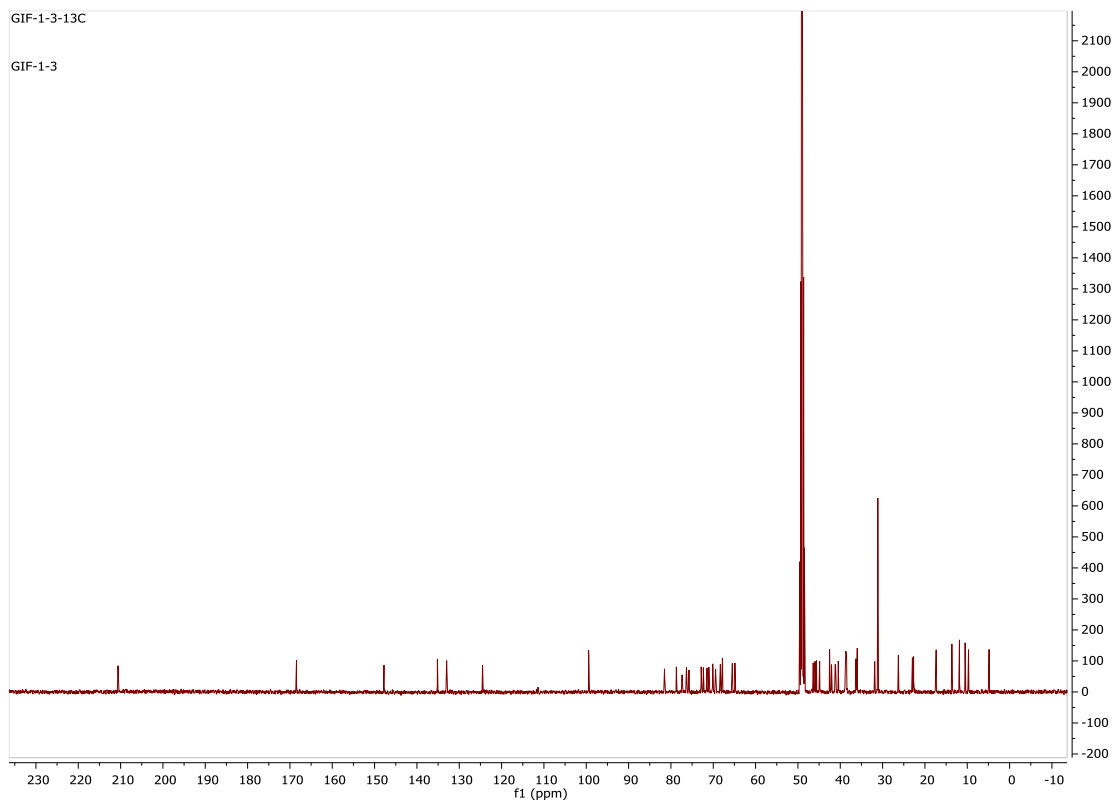

$^{13}\text{C}$  spectrum of **10** ( $\text{CD}_3\text{OD}$ , 500 MHz for  $^1\text{H}$  and 125 MHz for  $^{13}\text{C}$ )

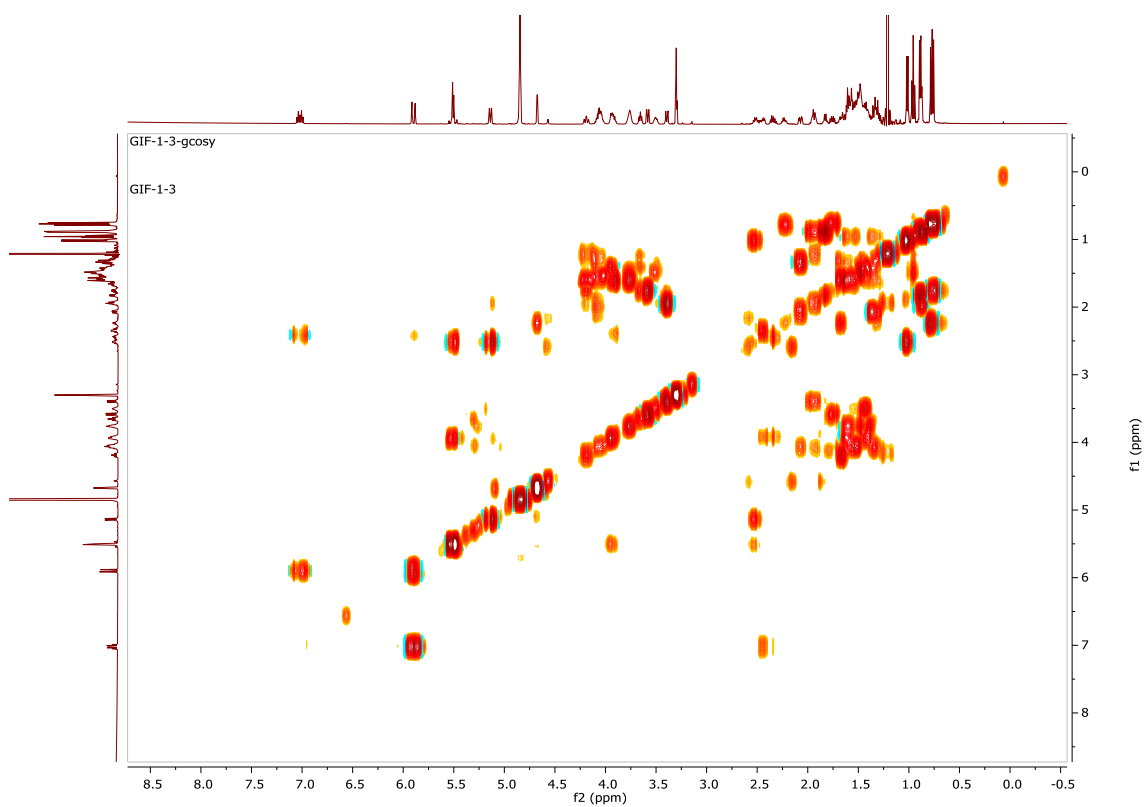

gCOSY spectrum of **10** (CD<sub>3</sub>OD, 500 MHz for <sup>1</sup>H and 125 MHz for <sup>13</sup>C)

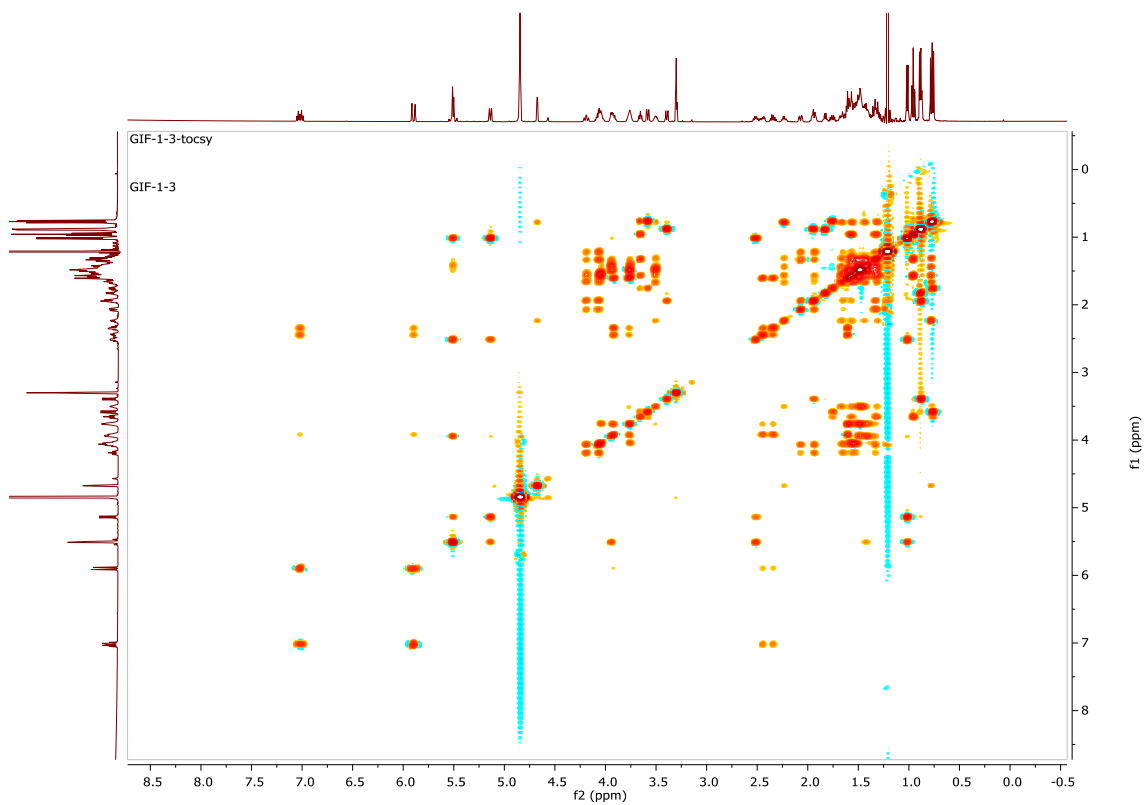

TOCSY spectrum of **10** (CD<sub>3</sub>OD, 500 MHz for <sup>1</sup>H and 125 MHz for <sup>13</sup>C)

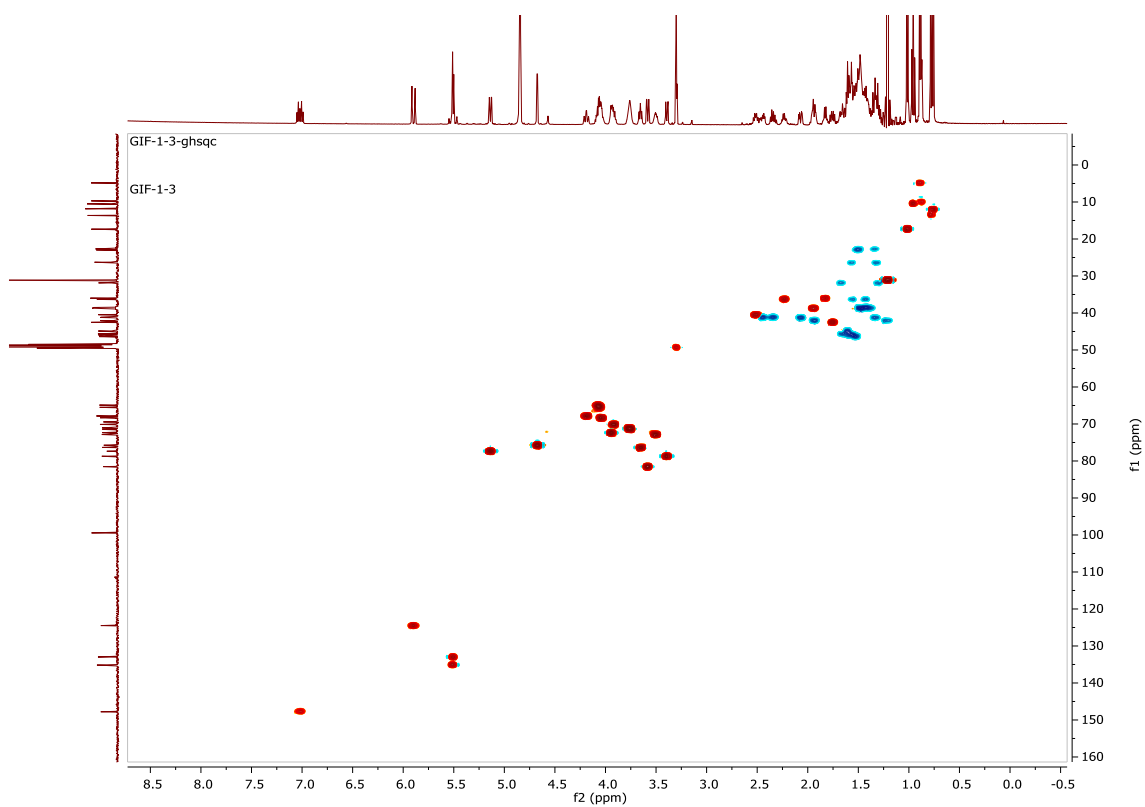

gHSQC spectrum of **10** (CD<sub>3</sub>OD, 500 MHz for <sup>1</sup>H and 125 MHz for <sup>13</sup>C)

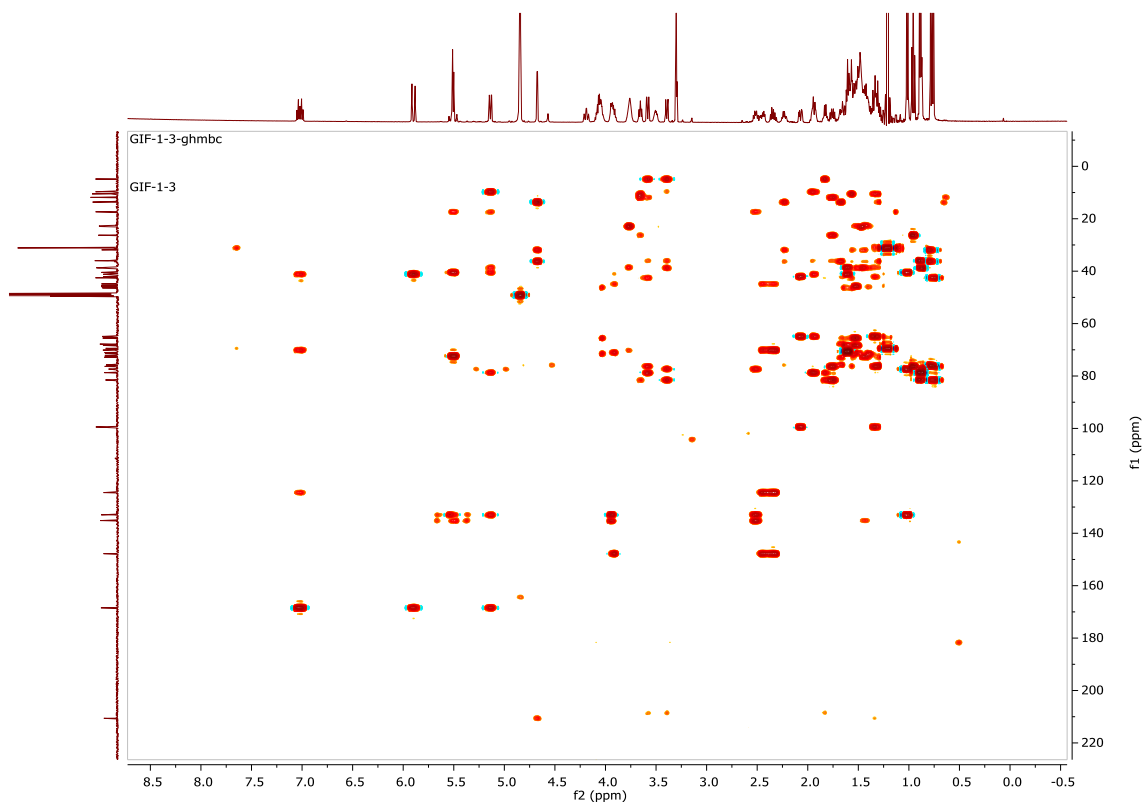

gHMBC spectrum of **10** (CD<sub>3</sub>OD, 500 MHz for <sup>1</sup>H and 125 MHz for <sup>13</sup>C)

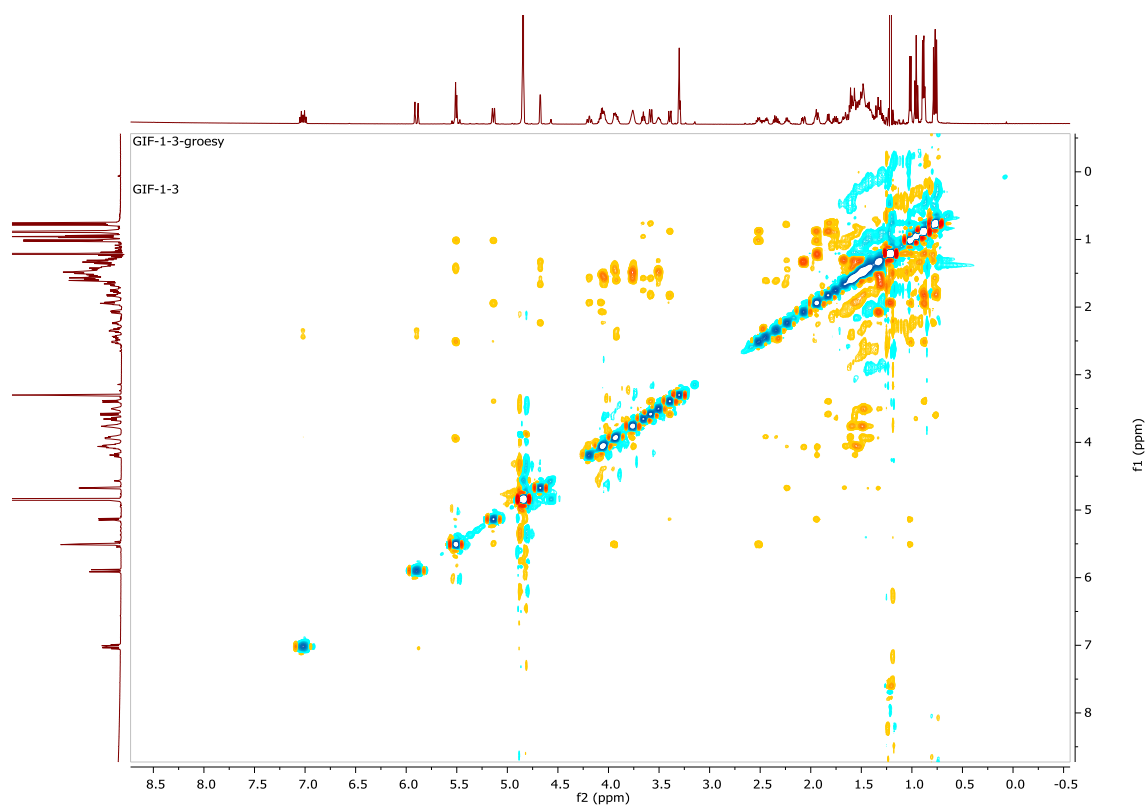

ROESY spectrum of **10** (CD<sub>3</sub>OD, 500 MHz for <sup>1</sup>H and 125 MHz for <sup>13</sup>C)

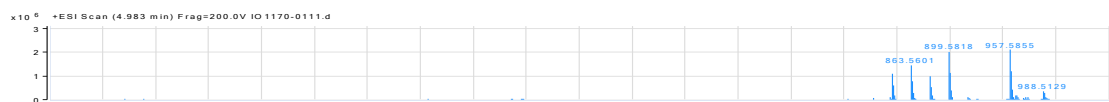

MS spectrum of **10**

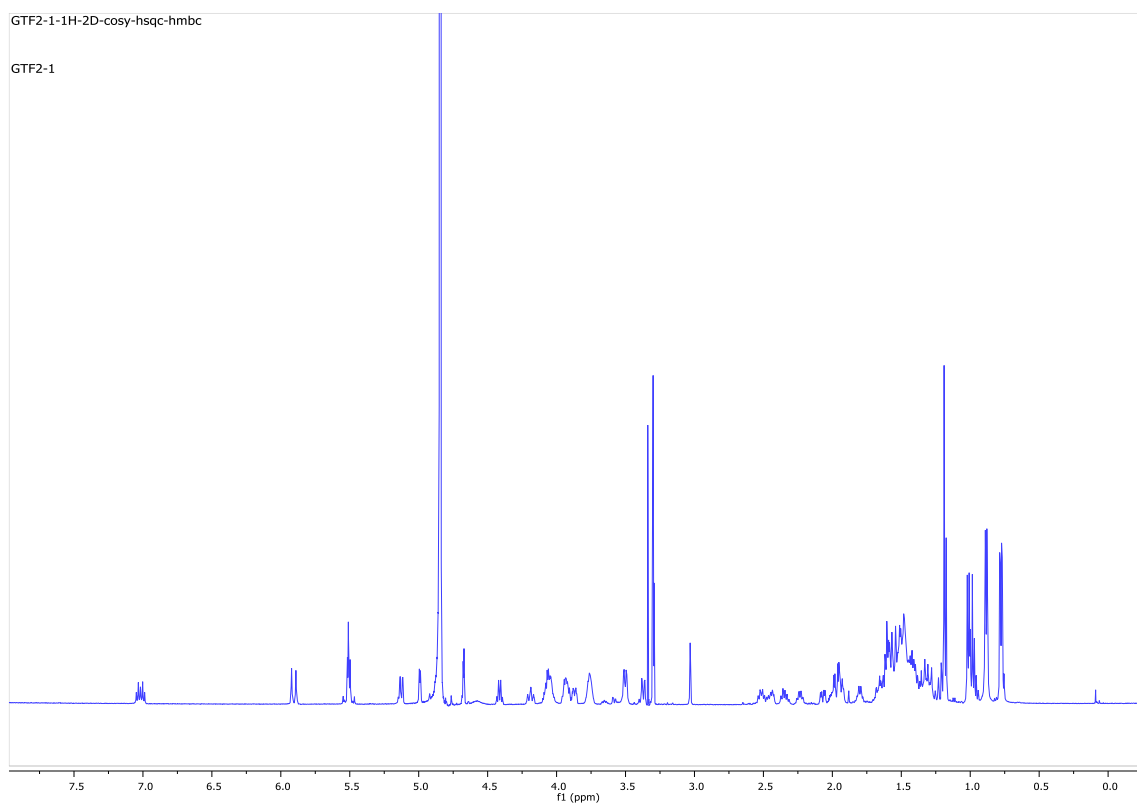

$^1\text{H}$  spectrum of **11** ( $\text{CD}_3\text{OD}$ , 500 MHz for  $^1\text{H}$  and 125 MHz for  $^{13}\text{C}$ )

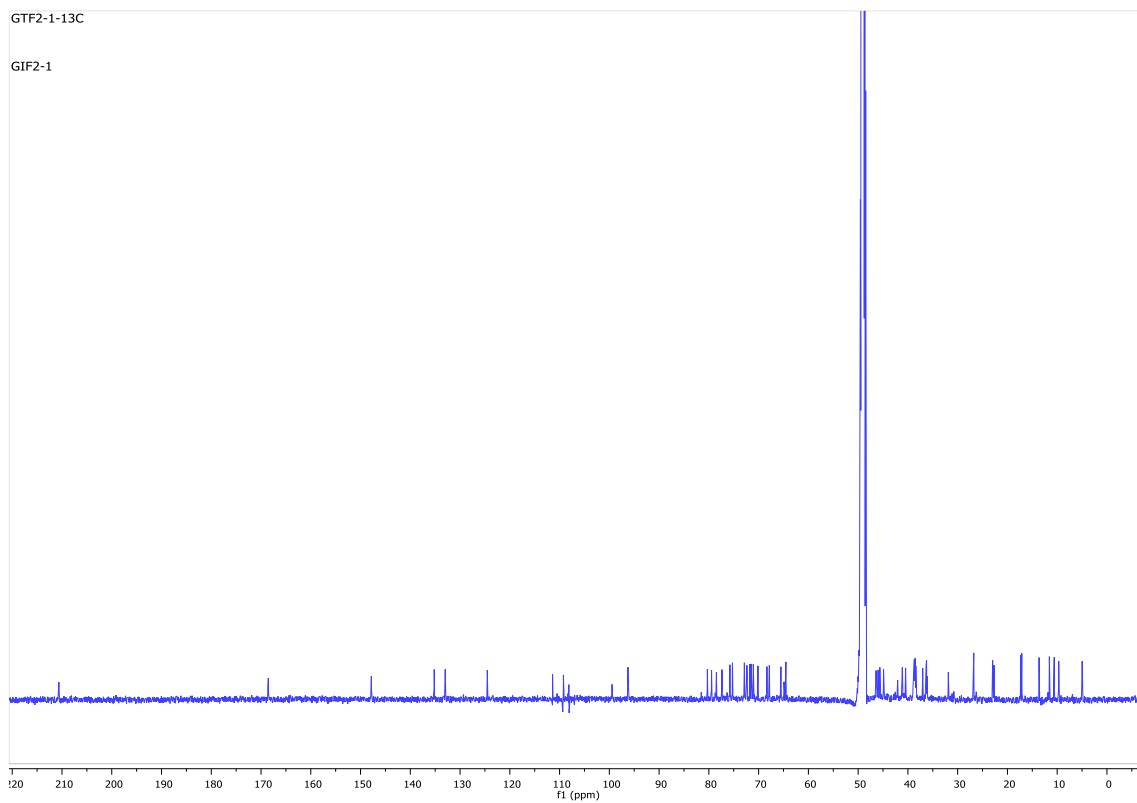

$^{13}\text{C}$  spectrum of **11** ( $\text{CD}_3\text{OD}$ , 500 MHz for  $^1\text{H}$  and 125 MHz for  $^{13}\text{C}$ )

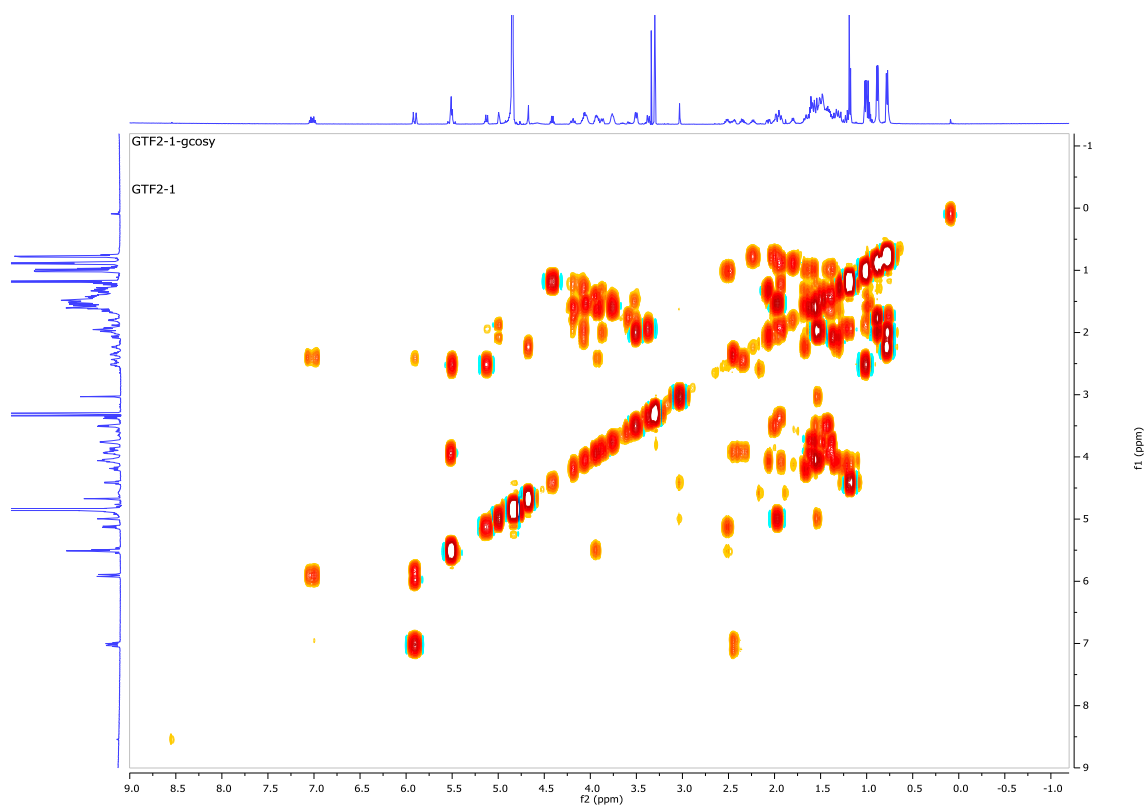

gCOSY spectrum of **11** (CD<sub>3</sub>OD, 500 MHz for <sup>1</sup>H and 125 MHz for <sup>13</sup>C)

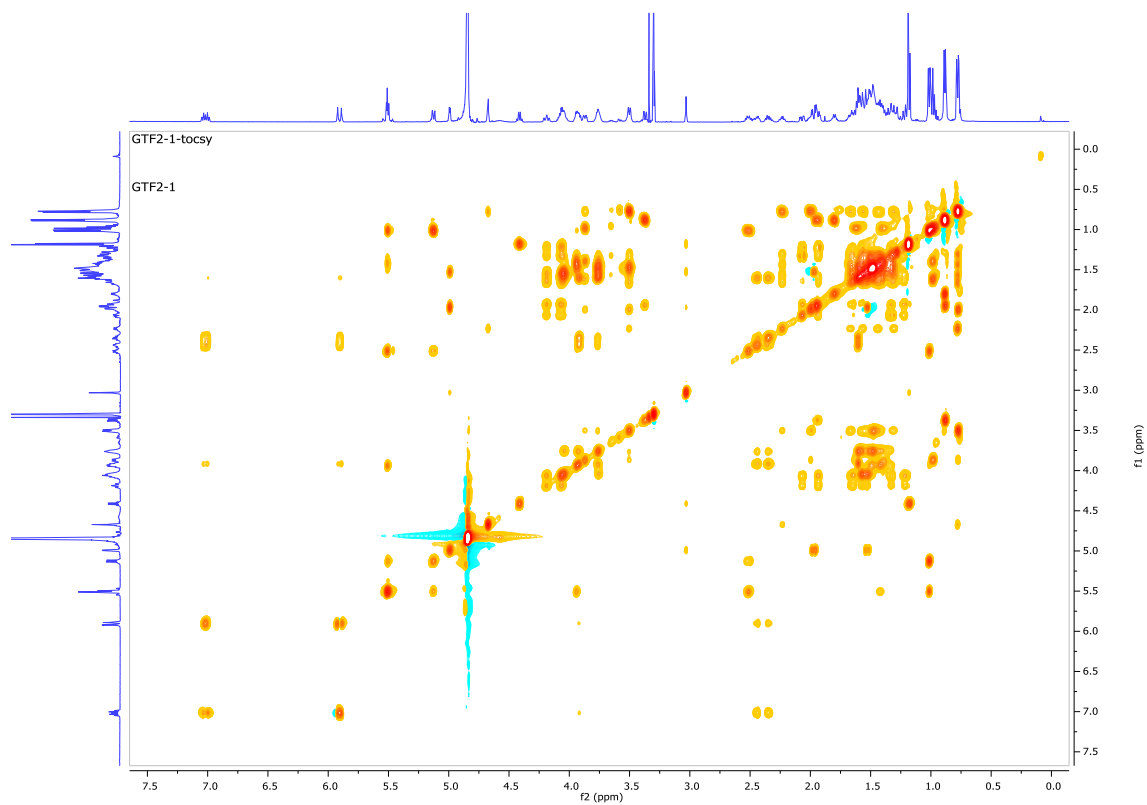

TOCSY spectrum of **11** (CD<sub>3</sub>OD, 500 MHz for <sup>1</sup>H and 125 MHz for <sup>13</sup>C)

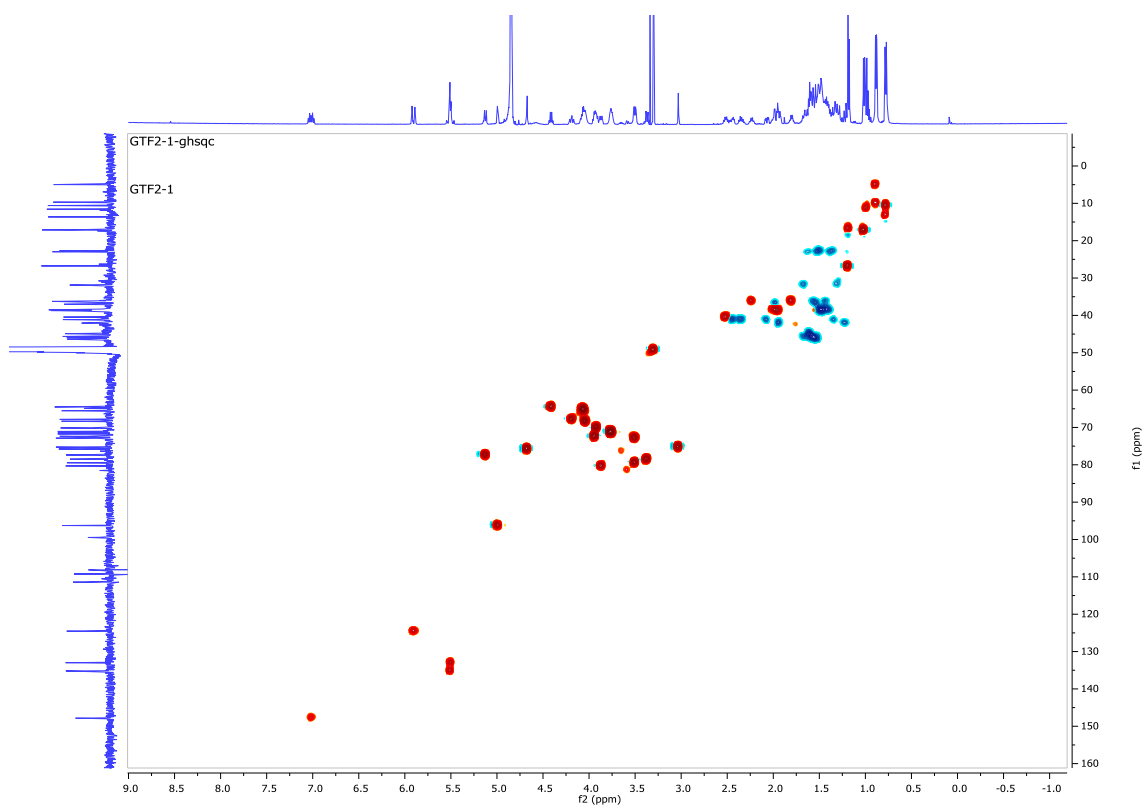

gHSQC spectrum of **11** (CD<sub>3</sub>OD, 500 MHz for <sup>1</sup>H and 125 MHz for <sup>13</sup>C)

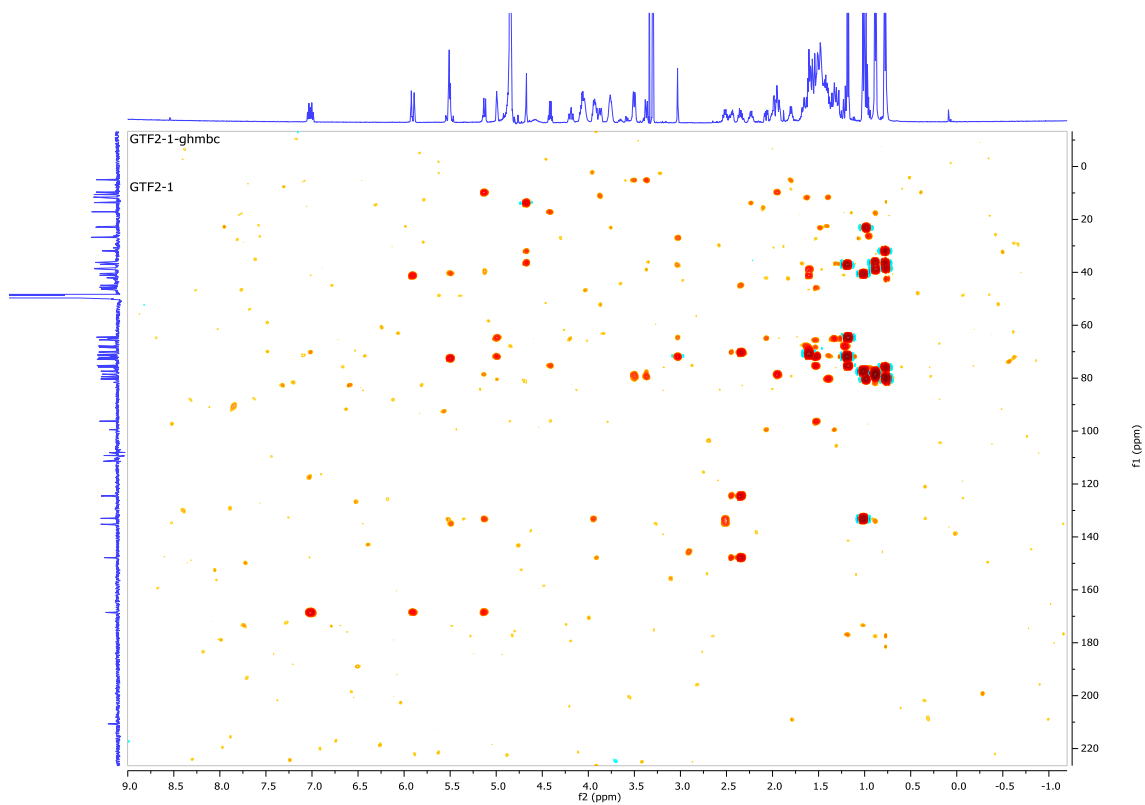

gHMBC spectrum of **11** (CD<sub>3</sub>OD, 500 MHz for <sup>1</sup>H and 125 MHz for <sup>13</sup>C)



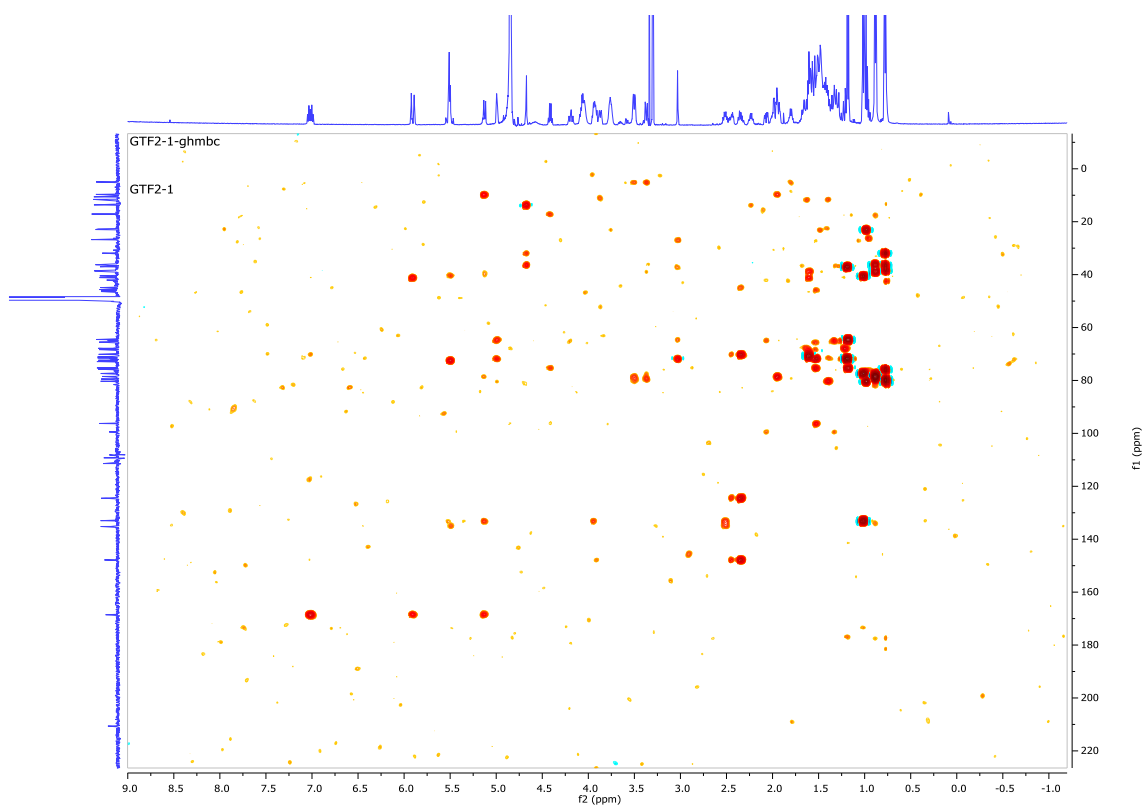

ROESY spectrum of **11** (CD<sub>3</sub>OD, 500 MHz for <sup>1</sup>H and 125 MHz for <sup>13</sup>C)

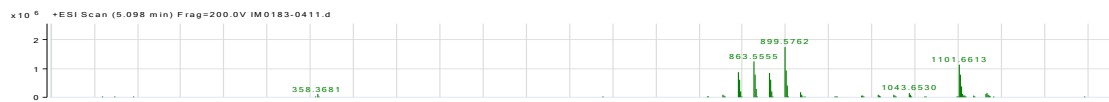

MS spectrum of **11**

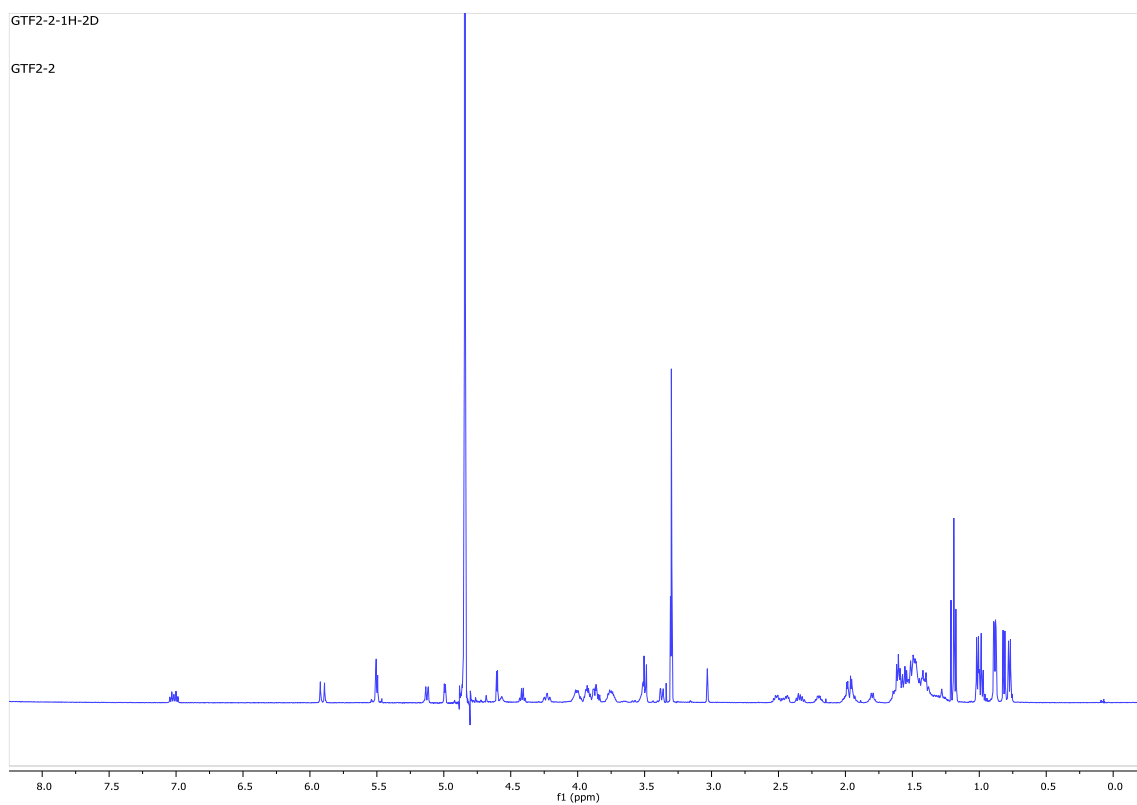

$^1\text{H}$  spectrum of **12** ( $\text{CD}_3\text{OD}$ , 500 MHz for  $^1\text{H}$  and 125 MHz for  $^{13}\text{C}$ )

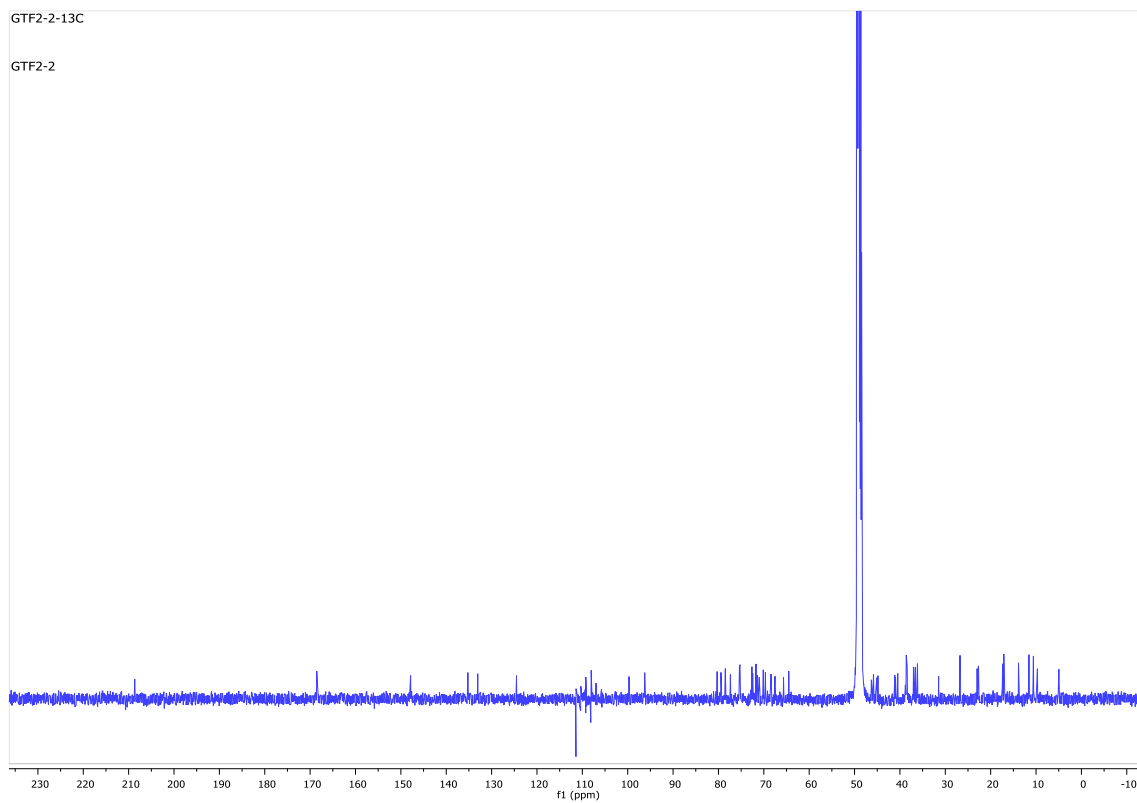

$^{13}\text{C}$  spectrum of **12** ( $\text{CD}_3\text{OD}$ , 500 MHz for  $^1\text{H}$  and 125 MHz for  $^{13}\text{C}$ )

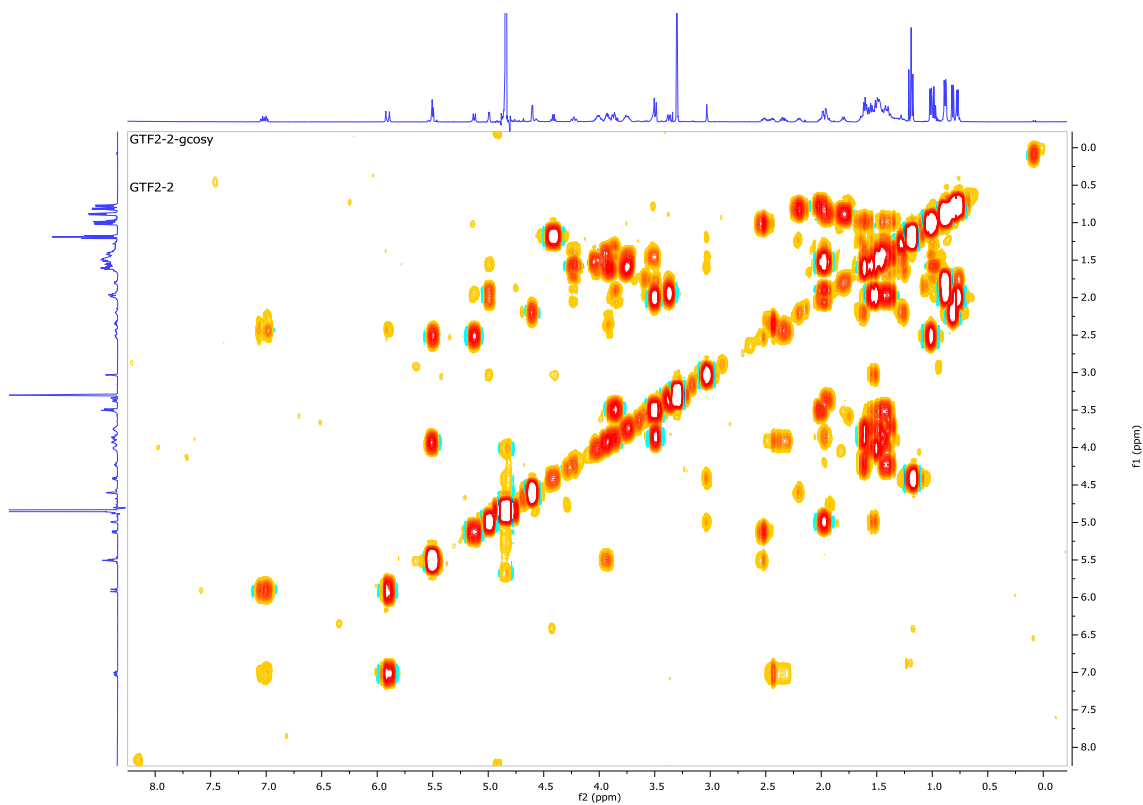

gCOSY spectrum of **12** (CD<sub>3</sub>OD, 500 MHz for <sup>1</sup>H and 125 MHz for <sup>13</sup>C)

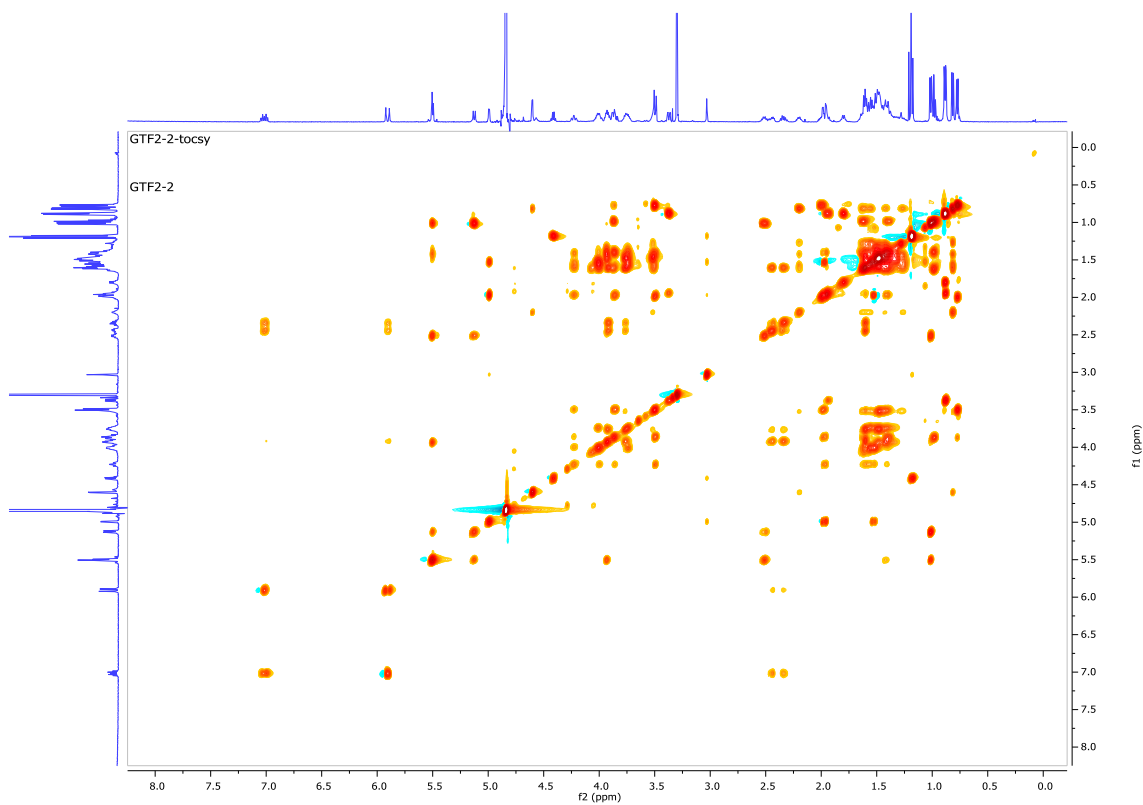

TOCSY spectrum of **12** (CD<sub>3</sub>OD, 500 MHz for <sup>1</sup>H and 125 MHz for <sup>13</sup>C)

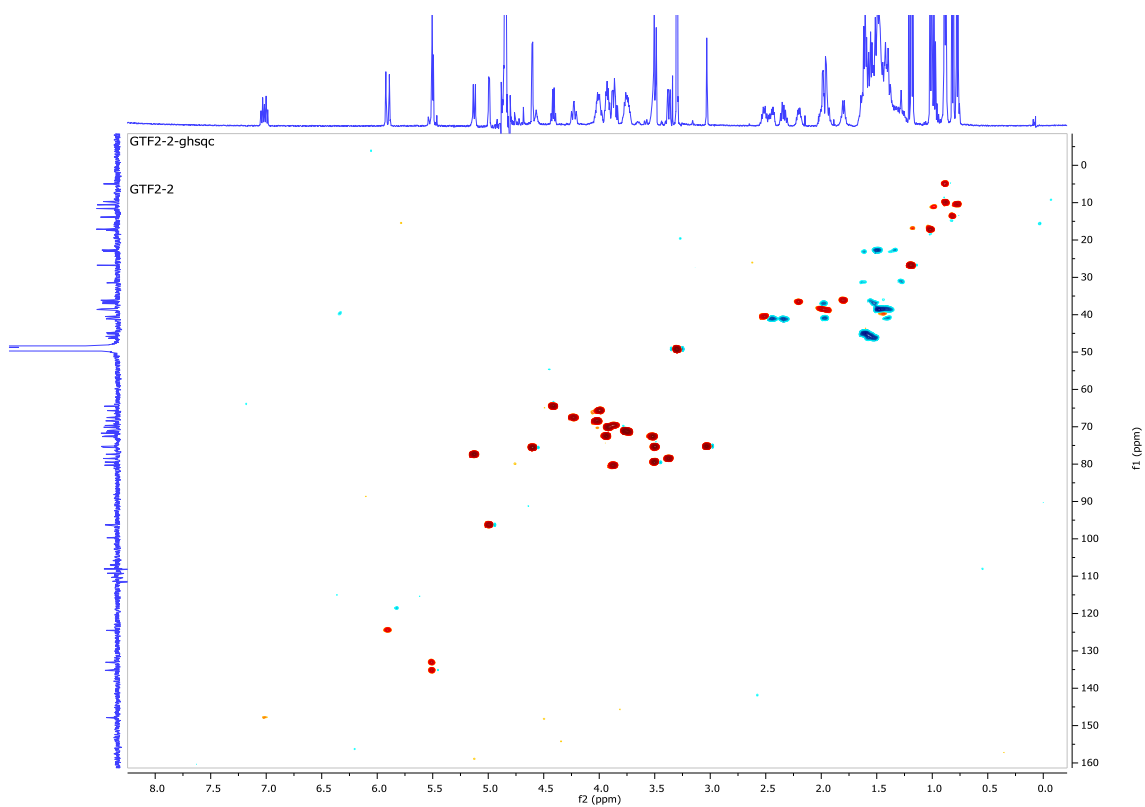

gHSQC spectrum of **12** (CD<sub>3</sub>OD, 500 MHz for <sup>1</sup>H and 125 MHz for <sup>13</sup>C)

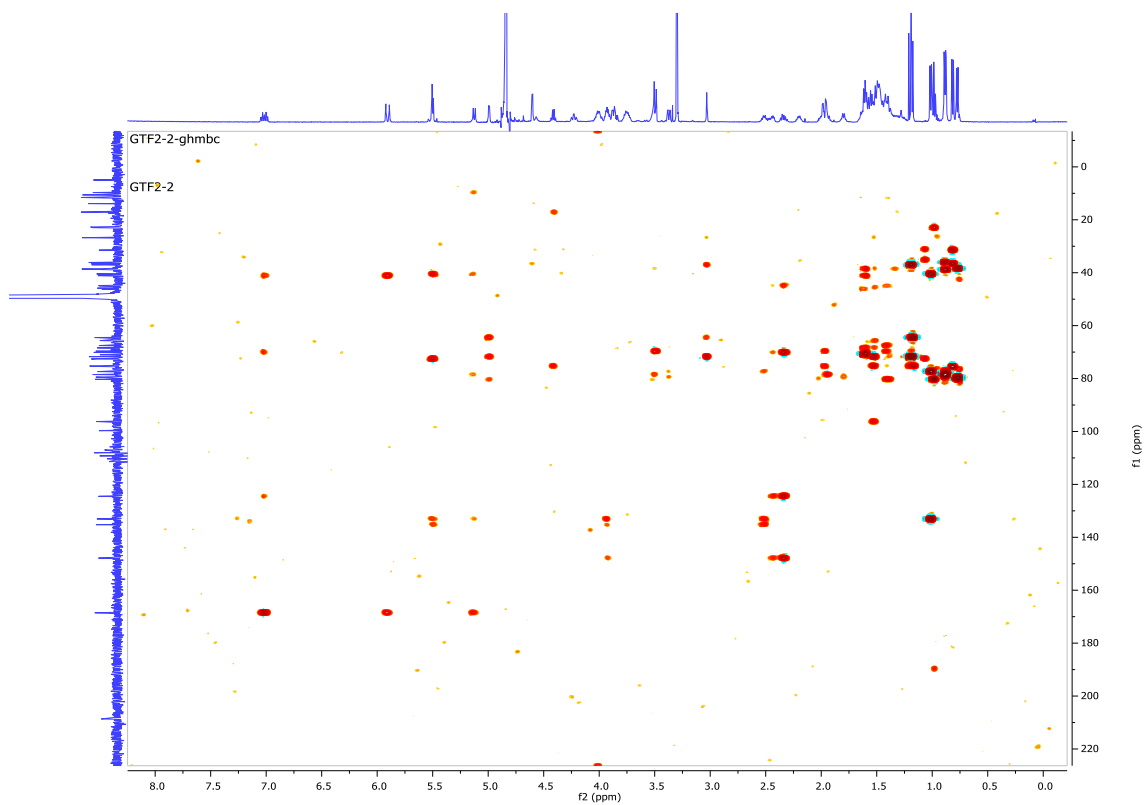

gHMBC spectrum of **12** (CD<sub>3</sub>OD, 500 MHz for <sup>1</sup>H and 125 MHz for <sup>13</sup>C)

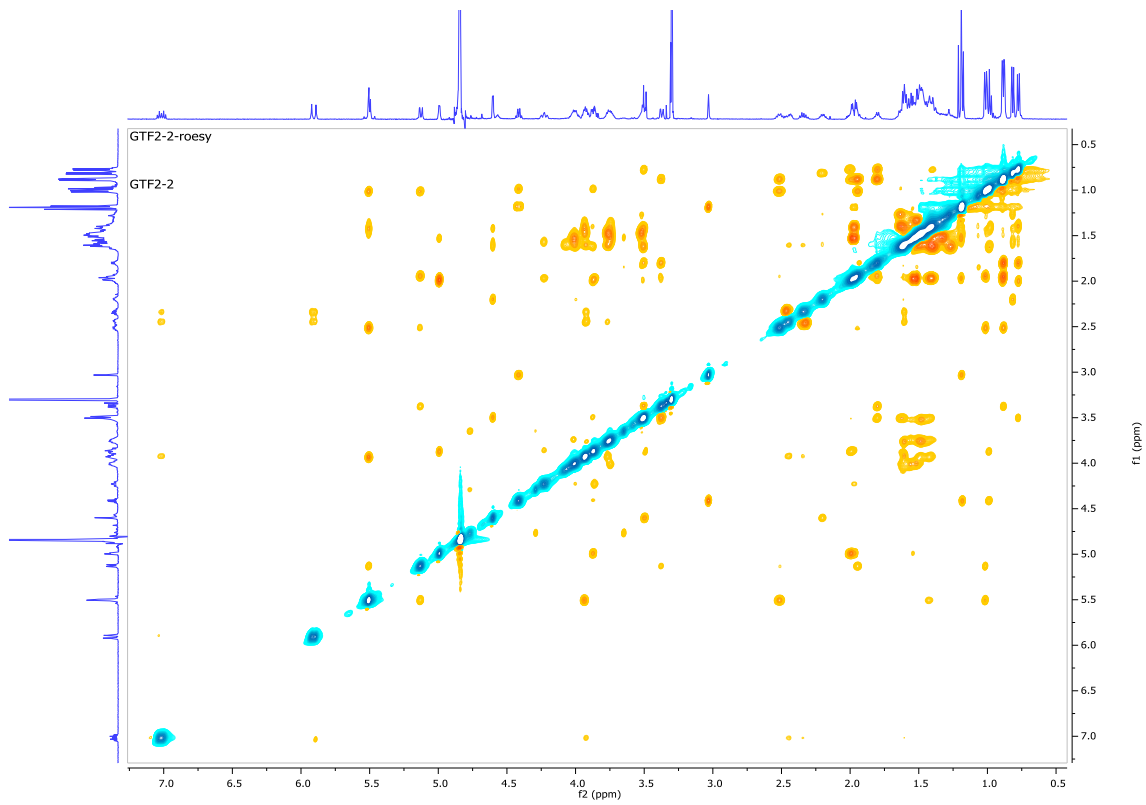

ROESY spectrum of **12** (CD<sub>3</sub>OD, 500 MHz for <sup>1</sup>H and 125 MHz for <sup>13</sup>C)

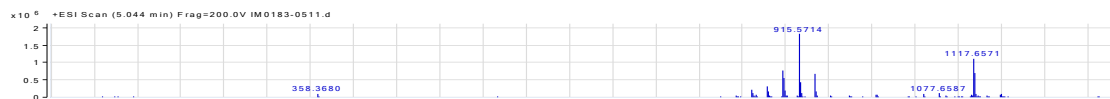

MS spectrum of **12**

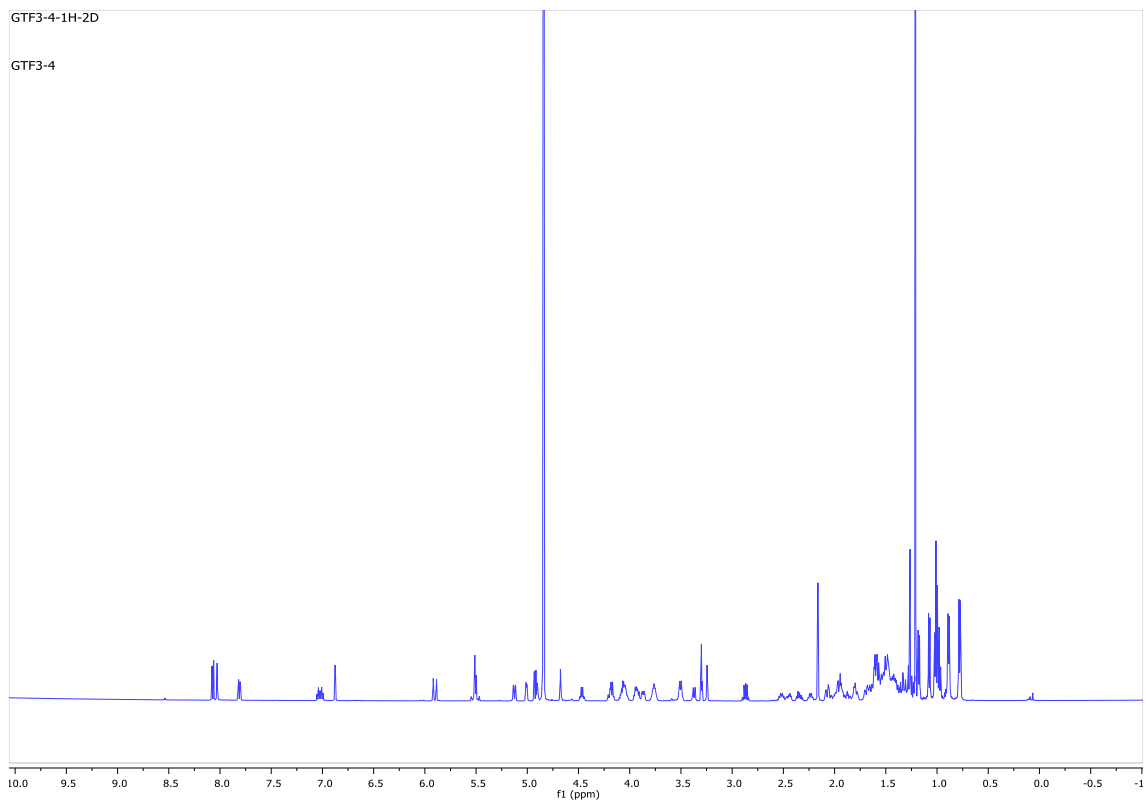

$^1\text{H}$  spectrum of **13** ( $\text{CD}_3\text{OD}$ , 500 MHz for  $^1\text{H}$  and 125 MHz for  $^{13}\text{C}$ )

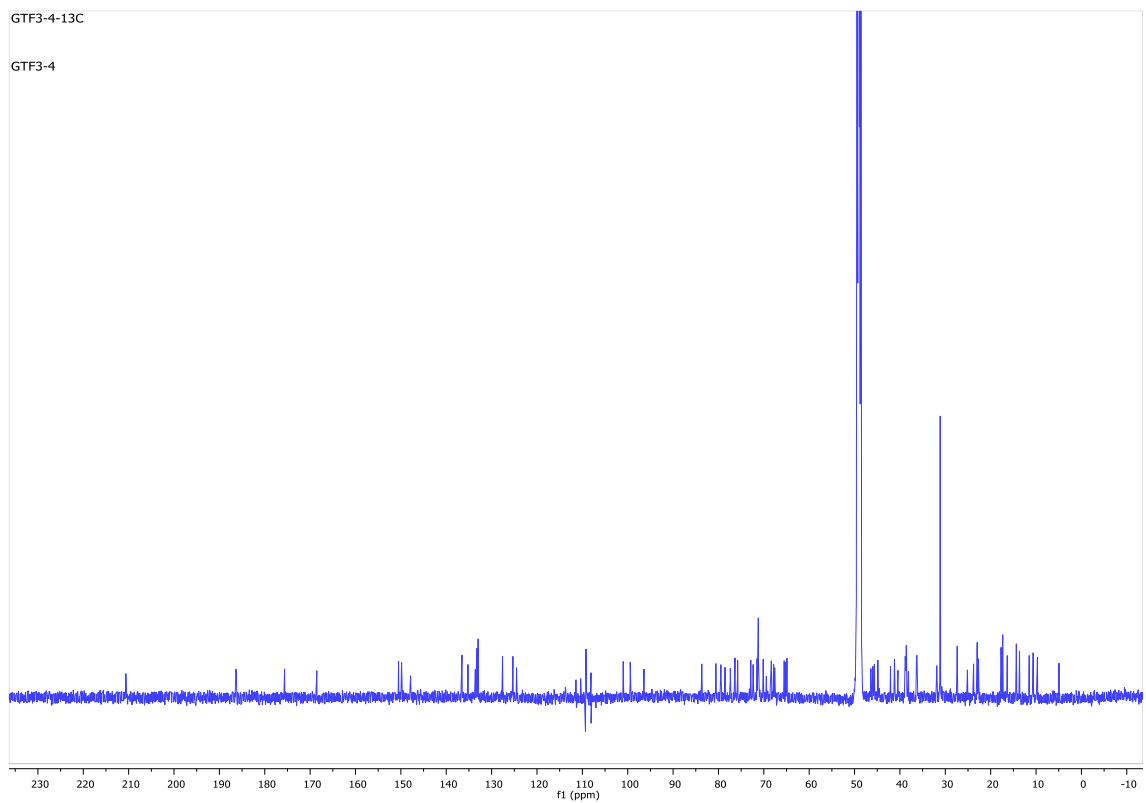

$^{13}\text{C}$  spectrum of **13** ( $\text{CD}_3\text{OD}$ , 500 MHz for  $^1\text{H}$  and 125 MHz for  $^{13}\text{C}$ )

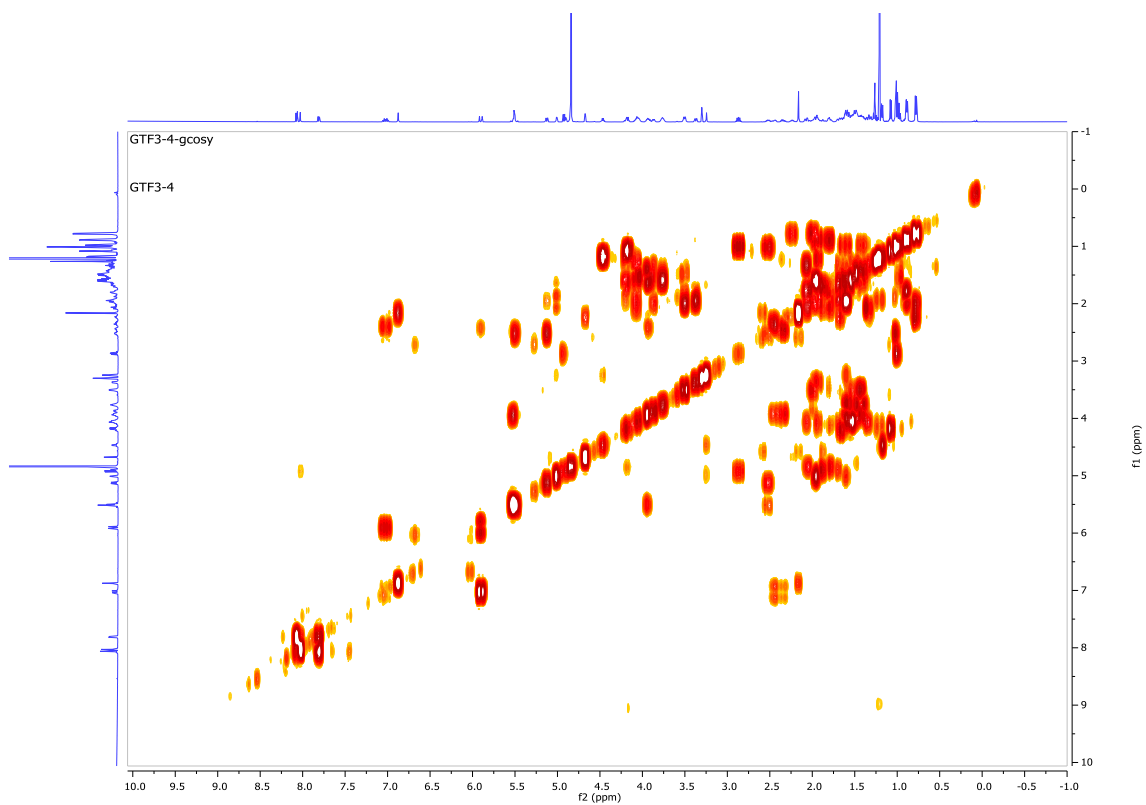

gCOSY spectrum of **13** (CD<sub>3</sub>OD, 500 MHz for <sup>1</sup>H and 125 MHz for <sup>13</sup>C)

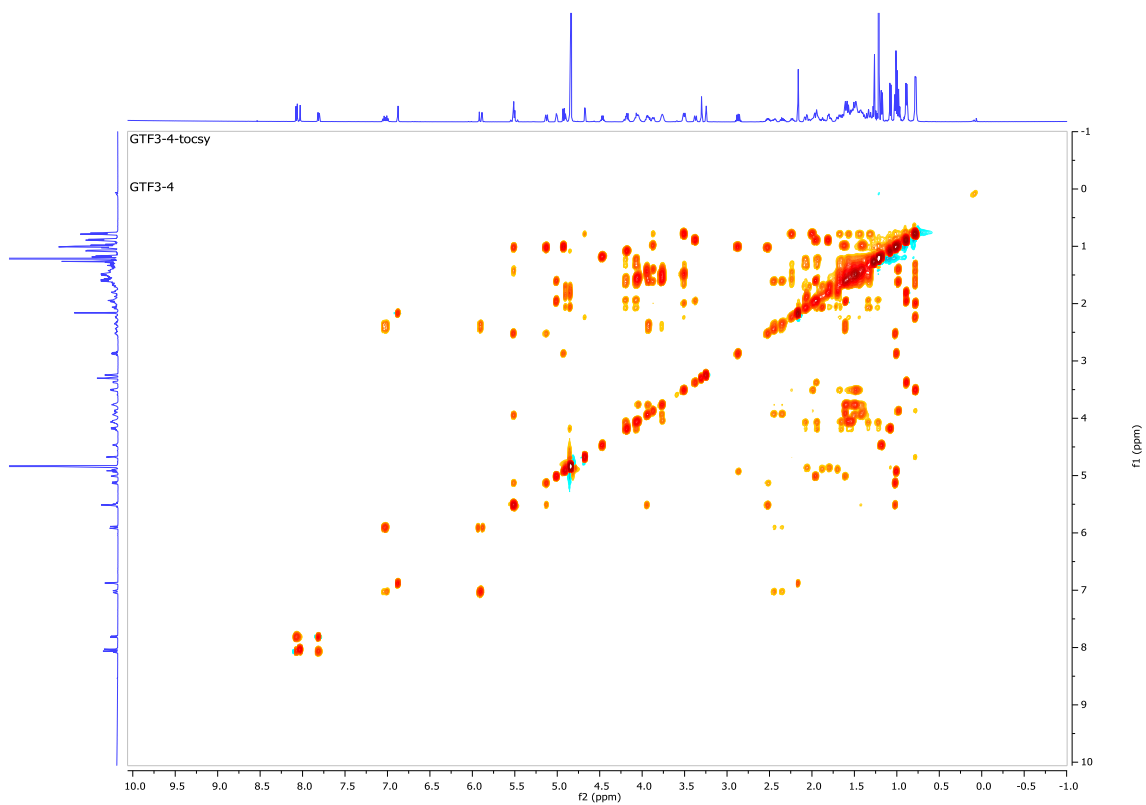

TOCSY spectrum of **13** (CD<sub>3</sub>OD, 500 MHz for <sup>1</sup>H and 125 MHz for <sup>13</sup>C)

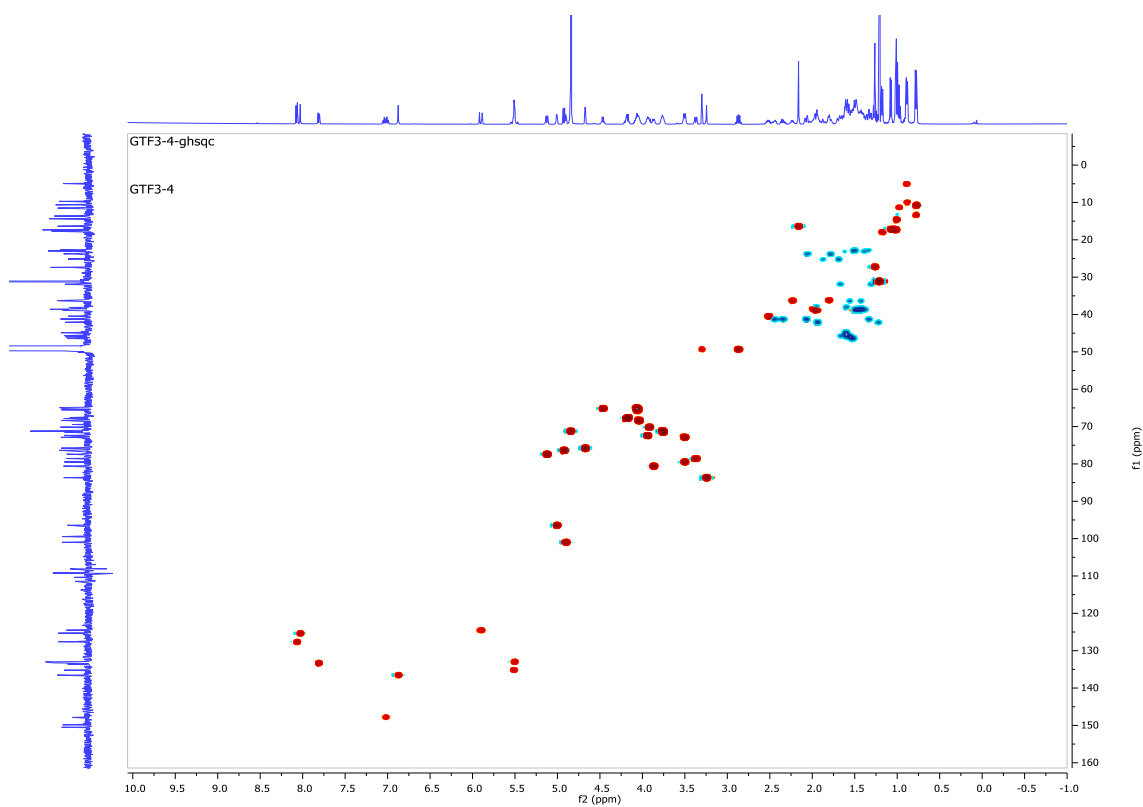

gHSQC spectrum of **13** (CD<sub>3</sub>OD, 500 MHz for <sup>1</sup>H and 125 MHz for <sup>13</sup>C)

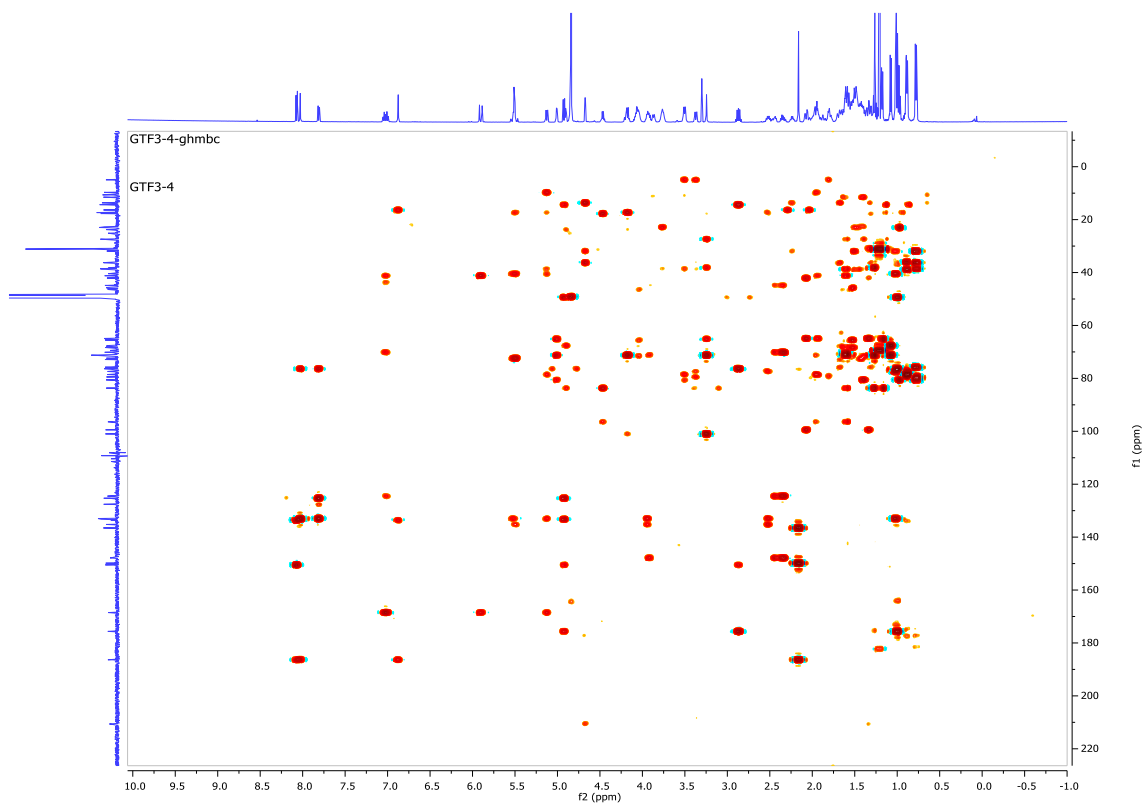

gHMBC spectrum of **13** (CD<sub>3</sub>OD, 500 MHz for <sup>1</sup>H and 125 MHz for <sup>13</sup>C)



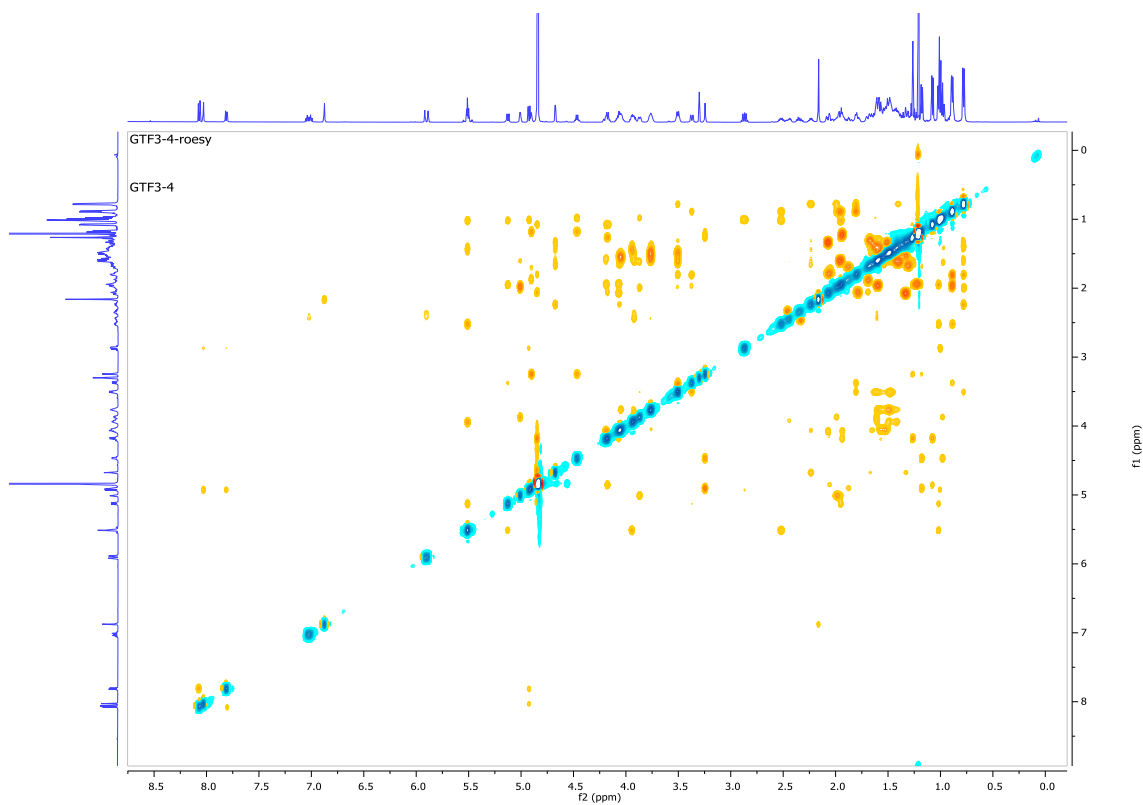

ROESY spectrum of **13** (CD<sub>3</sub>OD, 500 MHz for <sup>1</sup>H and 125 MHz for <sup>13</sup>C)

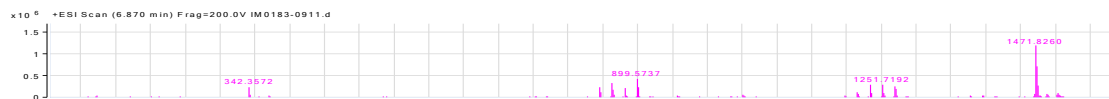

MS spectrum of **13**

**Table S1.**  $^1\text{H}$  and  $^{13}\text{C}$  NMR (500/125 MHz) data of Compounds **3** and **4** ( $\text{CD}_3\text{OD}$ ).

| N <sup>o</sup> | <b>3</b><br>$^1\text{H}$ , mult, $J = \text{Hz}$ | <b>3</b><br>$^{13}\text{C}$ | <b>4</b><br>$^1\text{H}$ , mult, $J = \text{Hz}$ | N <sup>o</sup> | <b>3</b><br>$^1\text{H}$ , mult, $J = \text{Hz}$ | <b>3</b><br>$^{13}\text{C}$ | <b>4</b><br>$^1\text{H}$ , mult, $J = \text{Hz}$ |
|----------------|--------------------------------------------------|-----------------------------|--------------------------------------------------|----------------|--------------------------------------------------|-----------------------------|--------------------------------------------------|
| <b>1</b>       | -                                                | 168.6                       | -                                                | <b>42</b>      | 1.62, m; 1.55, m                                 | 23.0                        | 1.62, m; 1.40, m                                 |
| <b>2</b>       | 5.91, d, 15.6                                    | 124.5                       | 5.91, d, 15.6                                    | <b>43</b>      | 0.97, t, 7.2                                     | 11.5                        | 0.98, t, 7.3                                     |
| <b>3</b>       | 7.02, ddd, 15.2, 7.2, 7.2                        | 147.9                       | 7.02, ddd, 15.1, 7.2, 7.2                        | <b>44</b>      | 0.82, d, 6.8                                     | 13.9                        | 0.78, d, 7.0                                     |
| <b>4</b>       | 2.45, m; 2.36, m                                 | 41.2                        | 2.45, m; 2.36, m                                 | <b>45</b>      | 1.02, d, 6.6                                     | 17.3                        | 1.02, d, 6.8                                     |
| <b>5</b>       | 3.93, m                                          | 70.2                        | 3.93, m                                          | <b>46</b>      | 0.88, d, 6.9                                     | 9.7                         | 0.88, d, 6.9                                     |
| <b>6</b>       | 1.61, m                                          | 44.9                        | 1.61, m                                          | <b>47</b>      | 0.89, d, 7.0                                     | 5.0                         | 0.89, d, 6.9                                     |
| <b>7</b>       | 3.78, m                                          | 71.1                        | 3.77, m                                          | <b>48</b>      | 0.77, d, 7.0                                     | 10.4                        | 0.77, d, 7.2                                     |
| <b>8</b>       | 1.51, m; 1.38, m                                 | 38.7                        | 1.52, m; 1.37, m                                 | <b>1'</b>      | 4.87, d, 3.8                                     | 95.6                        | 4.99, d, 3.7                                     |
| <b>9</b>       | 1.62, m; 1.40, m                                 | 23.0                        | 1.62, m; 1.40, m                                 | <b>2'</b>      | 1.99, m; 1.39                                    | 25.9                        | 1.97, m; 1.40, m                                 |
| <b>10</b>      | 1.51, m; 1.38, m                                 | 38.6                        | 1.51, m; 1.38, m                                 | <b>3'</b>      | 2.02, m; 1.98, m                                 | 25.8                        | 2.01, m; 1.98, m                                 |
| <b>11</b>      | 3.52, m                                          | 72.6                        | 3.51, d, 9.1                                     | <b>4'</b>      | 3.56, m                                          | 77.6                        | 3.56, s                                          |
| <b>12</b>      | 1.51, m; 1.38, m                                 | 36.2                        | 1.51, m; 1.38, m                                 | <b>5'</b>      | 4.08, m                                          | 67.9                        | 4.08, m                                          |
| <b>13</b>      | 1.66, m; 1.30, m                                 | 31.5                        | 1.67, m; 1.31, m                                 | <b>6'</b>      | 1.12, d, 6.6                                     | 17.4                        | 1.12, d, 6.5                                     |
| <b>14</b>      | 2.26, qd, 6.8, 2.4                               | 36.3                        | 2.24, qd, 7.0, 2.7                               | <b>1''</b>     | 4.60, m                                          | 104.8                       | 4.67, d, 2.8                                     |
| <b>15</b>      | 4.61, d, 2.7                                     | 75.6                        | 4.68, d, 2.8                                     | <b>2''</b>     | 1.97, m; 1.66, m                                 | 31.5                        | 1.65, m; 1.69, m                                 |
| <b>16</b>      | -                                                | 210.6                       | -                                                | <b>3''</b>     | 2.10, m; 1.57, m                                 | 28.7                        | 2.06, m; 1.78, m                                 |
| <b>17</b>      | -                                                | 99.4                        | -                                                | <b>4''</b>     | 4.46, m                                          | 74.6                        | 4.45, m                                          |
| <b>18</b>      | 3.50, m                                          | 75.4                        | 2.07, m; 1.34, m                                 | <b>5''</b>     | 3.61, m                                          | 74.3                        | 3.61, m                                          |
| <b>19</b>      | 3.86, m                                          | 69.7                        | 4.07, m                                          | <b>6''</b>     | 1.21, d, 6.7                                     | 18.7                        | 1.22, d, 6.6                                     |
| <b>20</b>      | 1.97, m; 1.40, m                                 | 41.1                        | 1.94, m; 1.22, m                                 | <b>49</b>      | -                                                | 175.3                       | -                                                |
| <b>21</b>      | 4.23, dd, 11.5, 9.7                              | 67.5                        | 4.19, dd, 10.7, 10.7                             | <b>50</b>      | 2.89, dq, 9.7, 7.1                               | 48.4                        | 2.88, dq, 9.9, 7.4                               |
| <b>22</b>      | 1.63, m                                          | 46.4                        | 1.63, m                                          | <b>51</b>      | 4.73, d, 9.8                                     | 84.1                        | 4.7, d, 9.9                                      |
| <b>23</b>      | 4.00, m                                          | 65.7                        | 4.06, m                                          | <b>52</b>      | -                                                | 148.5                       | -                                                |
| <b>24</b>      | 1.57, m                                          | 46.0                        | 1.57, m                                          | <b>53</b>      | 8.01, d, 1.8                                     | 125.9                       | 8.01, d, 1.7                                     |
| <b>25</b>      | 4.02, m                                          | 68.4                        | 4.02, m                                          | <b>54</b>      | -                                                | 133.5                       | -                                                |
| <b>26</b>      | 1.53, m                                          | 45.6                        | 1.53, m                                          | <b>55</b>      | -                                                | 186.2                       | -                                                |
| <b>27</b>      | 3.76, m                                          | 71.2                        | 3.75, m                                          | <b>56</b>      | 6.89, q, 1.6                                     | 136.5                       | 6.89, q, 1.5                                     |
| <b>28</b>      | 1.57, m; 1.44, m                                 | 38.6                        | 1.57, m; 1.44, m                                 | <b>57</b>      | -                                                | 150.0                       | -                                                |
| <b>29</b>      | 1.51, m                                          | 22.7                        | 1.51, m                                          | <b>58</b>      | -                                                | 186.2                       | -                                                |
| <b>30</b>      | 1.51, m; 1.38, m                                 | 38.7                        | 1.51, m; 1.38, m                                 | <b>59</b>      | -                                                | 133.1                       | -                                                |
| <b>31</b>      | 3.94, m                                          | 72.5                        | 3.93, m                                          | <b>60</b>      | 8.09, d, 8.0                                     | 127.6                       | 8.09, d, 8.2                                     |
| <b>32</b>      | 5.51, dd, 15.4, 4.5                              | 135.2                       | 5.52, dd, 15.5, 4.5                              | <b>61</b>      | 7.82, dd, 8.1, 1.8                               | 133.9                       | 7.82, dd, 8.2, 1.2                               |
| <b>33</b>      | 5.49, dd, 15.4, 7.0                              | 133.1                       | 5.49, 15.5, 7.0                                  | <b>62</b>      | 0.87, d, 7.1                                     | 14.3                        | 0.92, d, 7.2                                     |
| <b>34</b>      | 2.51, m                                          | 40.5                        | 2.52, m                                          | <b>63</b>      | 2.17, d, 1.5                                     | 16.3                        | 2.16, d, 1.6                                     |
| <b>35</b>      | 5.14, d, 9.5                                     | 77.4                        | 5.13, dd, 9.5, 1.8                               | <b>1'''</b>    | 4.96, m                                          | 101.3                       |                                                  |
| <b>36</b>      | 1.98, m                                          | 38.7                        | 1.99, m                                          | <b>2'''</b>    | 2.00, m; 1.98, m                                 | 25.8                        |                                                  |
| <b>37</b>      | 3.37, dd, 9.4, 2.3                               | 78.5                        | 3.37, dd, 8.7                                    | <b>3'''</b>    | 1.60, m; 1.45, m                                 | 25.6                        |                                                  |
| <b>38</b>      | 1.81, m                                          | 36.1                        | 1.81, m                                          | <b>4'''</b>    | 3.31, m                                          | 67.6                        |                                                  |
| <b>39</b>      | 3.51, m                                          | 79.5                        | 3.50, m                                          | <b>5'''</b>    | 3.13, q, 6.9                                     | 68.3                        |                                                  |
| <b>40</b>      | 2.00, m                                          | 38.8                        | 2.01, m                                          | <b>6'''</b>    | 0.45, d, 6.6                                     | 16.8                        | 0.45, d, 6.6                                     |
| <b>41</b>      | 3.92, m                                          | 78.9                        | 3.82, ddd, 9.2, 3.2, 3.2                         |                |                                                  |                             |                                                  |

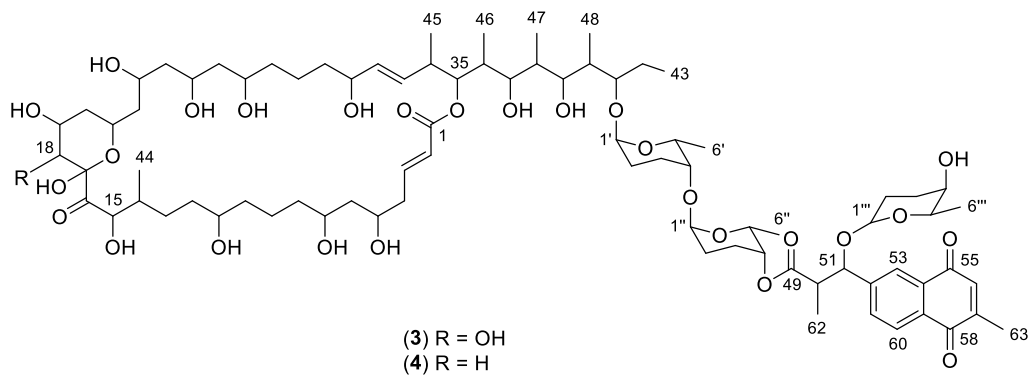

**Table S2.**  $^1\text{H}$  and  $^{13}\text{C}$  NMR (500/125 MHz) data of Compounds **5** and **13** ( $\text{CD}_3\text{OD}$ ).

| N°        | <b>5</b><br>$^1\text{H}$ , mult, $J = \text{Hz}$ | <b>13</b><br>$^1\text{H}$ , mult, $J = \text{Hz}$ | <b>13</b><br>$^{13}\text{C}$ | N°         | <b>1</b><br>$^1\text{H}$ , mult, $J = \text{Hz}$ | <b>13</b><br>$^1\text{H}$ , mult, $J = \text{Hz}$ | <b>13</b><br>$^{13}\text{C}$ |
|-----------|--------------------------------------------------|---------------------------------------------------|------------------------------|------------|--------------------------------------------------|---------------------------------------------------|------------------------------|
| <b>1</b>  |                                                  | -                                                 | 168.5                        | <b>42</b>  | 1.61, m; 1.39, m                                 | 1.61, m; 1.39, m                                  | 23.0                         |
| <b>2</b>  | 5.90, d, 15.6                                    | 5.90, d, 15.6                                     | 124.5                        | <b>43</b>  | 0.99, t, 7.3                                     | 0.99, t, 7.3                                      | 11.8                         |
| <b>3</b>  | 7.02, m                                          | 7.02, m                                           | 147.9                        | <b>44</b>  | 0.78, d, 6.8                                     | 0.78, d, 6.8                                      | 13.6                         |
| <b>4</b>  | 2.45, m; 2.34, m                                 | 2.45, m; 2.34, m                                  | 41.2                         | <b>45</b>  | 1.02, d, 6.6                                     | 1.02, d, 6.6                                      | 17.3                         |
| <b>5</b>  | 3.92, m                                          | 3.92, m                                           | 70.2                         | <b>46</b>  | 0.90, d, 6.9                                     | 0.90, d, 6.9                                      | 9.7                          |
| <b>6</b>  | 1.61, m                                          | 1.61, m                                           | 44.9                         | <b>47</b>  | 0.90, d, 7.4                                     | 0.90, d, 7.4                                      | 4.6                          |
| <b>7</b>  | 3.76, m                                          | 3.76, m                                           | 71.3                         | <b>48</b>  | 0.79, d, 6.9                                     | 0.79, d, 6.9                                      | 10.6                         |
| <b>8</b>  | 1.38, m; 1.51, m                                 | 1.38, m; 1.51, m                                  | 38.7                         | <b>1'</b>  | 5.01, d, 3.7                                     | 5.01, d, 3.7                                      | 96.4                         |
| <b>9</b>  | 1.61, m; 1.39, m                                 | 1.61, m; 1.39, m                                  | 23.0                         | <b>2'</b>  | 1.95, dd, 14.0, 3.5;<br>1.60, d, 13.5            | 1.95, dd, 14.0, 3.5;<br>1.60, d, 13.5             | 38.1                         |
| <b>10</b> | 1.51, m; 1.38, m                                 | 1.51, m; 1.38, m                                  | 38.6                         | <b>3'</b>  | -                                                | -                                                 | 71.5                         |
| <b>11</b> | 3.50, m                                          | 3.50, m                                           | 72.9                         | <b>4'</b>  | 3.25, br s                                       | 3.25, br s                                        | 83.7                         |
| <b>12</b> | 1.51, m; 1.38, m                                 | 1.51, m; 1.38, m                                  | 36.2                         | <b>5'</b>  | 4.47, q, 7.0                                     | 4.47, q, 7.0                                      | 65.2                         |
| <b>13</b> | 1.67, m; 1.31, m                                 | 1.67, m; 1.31, m                                  | 31.9                         | <b>6'</b>  | 1.18, d, 6.5                                     | 1.18, d, 6.5                                      | 17.7                         |
| <b>14</b> | 2.24, dddd, 7.0, 7.0,<br>7.0, 2.8                | 2.24, dddd, 7.0,<br>7.0, 7.0, 2.8                 | 36.3                         | <b>7'</b>  | 1.26, s                                          | 1.26, s                                           | 27.4                         |
| <b>15</b> | 4.67, d, 2.8                                     | 4.67, d, 2.8                                      | 75.8                         | <b>1''</b> | 4.93, dd, 4.4, 4.4                               | 4.90, d, 3.3                                      | 101.0                        |
| <b>16</b> | -                                                | -                                                 | 210.6                        | <b>2''</b> | 2.07, ddd, 14.4,<br>4.3, 4.2; 1.95, m            | 1.87, m; 1.69, m                                  | 25.1                         |
| <b>17</b> | -                                                | -                                                 | 99.5                         | <b>3''</b> | 3.86, m                                          | 2.06, m; 1.78, m                                  | 23.8                         |
| <b>18</b> | 2.07, dd, 13.3, 3.8 ;<br>1.33, dd, 12.8, 11.2    | 2.07, dd, 13.3,<br>3.8 ; 1.33, dd,<br>12.8, 11.2  | 41.2                         | <b>4''</b> | 4.74, dd, 4.5, 2.3                               | 4.85, m                                           | 71.3                         |
| <b>19</b> | 4.06, m                                          | 4.06, m                                           | 64.9                         | <b>5''</b> | 4.44, m                                          | 4.18, dq, 6.3, 1.4                                | 67.9                         |
| <b>20</b> | 1.94, m ; 1.22, m                                | 1.94, m ; 1.22, m                                 | 42.1                         | <b>6''</b> | 1.11, d, 6.7                                     | 1.08, d, 6.6                                      | 17.3                         |
| <b>21</b> | 4.18, m                                          | 4.18, m                                           | 67.6                         | <b>49</b>  | -                                                | -                                                 | 175.6                        |
| <b>22</b> | 1.63, m                                          | 1.63, m                                           | 46.4                         | <b>50</b>  | 2.87, dq, 9.8, 7.1                               | 2.87, dq, 8.4, 7.1                                | 49.0                         |
| <b>23</b> | 4.07, m                                          | 4.07, m                                           | 65.5                         | <b>51</b>  | 4.78, d, 10.0                                    | 4.92, d, 8.2                                      | 76.4                         |
| <b>24</b> | 1.57, m                                          | 1.57, m                                           | 46.0                         | <b>52</b>  | -                                                | -                                                 | 150.5                        |
| <b>25</b> | 4.04, m                                          | 4.04, m                                           | 68.3                         | <b>53</b>  | 8.03, d, 1.7                                     | 8.03, d, 1.4                                      | 125.3                        |
| <b>26</b> | 1.53, m                                          | 1.53, m                                           | 45.6                         | <b>54</b>  | -                                                | -                                                 | 133.6                        |
| <b>27</b> | 3.76, m                                          | 3.76, m                                           | 71.1                         | <b>55</b>  | -                                                | -                                                 | 186.4                        |
| <b>28</b> | 1.57, m; 1.44, m                                 | 1.57, m; 1.44, m                                  | 38.6                         | <b>56</b>  | 6.88, q, 1.6                                     | 6.88, q, 1.5                                      | 136.5                        |
| <b>29</b> | 1.51, m                                          | 1.51, m                                           | 22.7                         | <b>57</b>  | -                                                | -                                                 | 150.0                        |
| <b>30</b> | 1.51, m; 1.38, m                                 | 1.51, m; 1.38, m                                  | 38.6                         | <b>58</b>  | -                                                | -                                                 | 186.3                        |
| <b>31</b> | 3.94, m                                          | 3.94, m                                           | 72.4                         | <b>59</b>  | -                                                | -                                                 | 133.0                        |
| <b>32</b> | 5.53, dd, 15.5, 4.5                              | 5.53, dd, 15.5, 4.5                               | 135.2                        | <b>60</b>  | 8.07, d, 8.0                                     | 8.07, d, 8.0                                      | 127.6                        |
| <b>33</b> | 5.49, 15.5, 7.0                                  | 5.49, 15.5, 7.0                                   | 133.0                        | <b>61</b>  | 7.81, dd, 8.0, 1.7                               | 7.81, dd, 8.1, 1.8                                | 133.3                        |
| <b>34</b> | 2.52, ddd, 9.5, 6.7,<br>6.7                      | 2.52, ddd, 9.5,<br>6.7, 6.7                       | 40.4                         | <b>62</b>  | 0.89, d, 7.1                                     | 0.92, d, 7.2                                      | 14.3                         |
| <b>35</b> | 5.13, dd, 9.7, 1.7                               | 5.13, dd, 9.7, 1.7                                | 77.4                         | <b>63</b>  | 2.16, d, 1.5                                     | 2.16, d, 1.6                                      | 16.3                         |
| <b>36</b> | 1.99, m                                          | 1.99, m                                           | 38.8                         |            |                                                  |                                                   |                              |
| <b>37</b> | 3.37, dd, 9.6, 2.0                               | 3.37, dd, 9.6, 2.0                                | 78.6                         |            |                                                  |                                                   |                              |
| <b>38</b> | 1.80, m                                          | 1.80, m                                           | 36.1                         |            |                                                  |                                                   |                              |
| <b>39</b> | 3.50, m                                          | 3.50, m                                           | 79.5                         |            |                                                  |                                                   |                              |
| <b>40</b> | 1.99, m                                          | 1.99, m                                           | 38.8                         |            |                                                  |                                                   |                              |
| <b>41</b> | 3.87, ddd, 9.5, 3.5,<br>3.5                      | 3.87, ddd, 9.5,<br>3.5, 3.5                       | 80.6                         |            |                                                  |                                                   |                              |



**Table S3.**  $^1\text{H}$  NMR (500/125 MHz) data of Compounds **6** and **7** ( $\text{CD}_3\text{OD}$ ).

| N°        | <b>6</b><br>$^1\text{H}$ , mult, $J = \text{Hz}$ | <b>7</b><br>$^1\text{H}$ , mult, $J = \text{Hz}$ |
|-----------|--------------------------------------------------|--------------------------------------------------|
| <b>1</b>  | -                                                | -                                                |
| <b>2</b>  | 2.78, m                                          | -                                                |
| <b>3</b>  | 4.92, d, 8.3                                     | 8.62, dd, 1.6                                    |
| <b>4</b>  | 0.95, d, 7.1                                     | -                                                |
| <b>5</b>  | -                                                | 6.95, q, 1.5                                     |
| <b>6</b>  | 8.03, d, 1.7                                     | -                                                |
| <b>7</b>  | -                                                | -                                                |
| <b>8</b>  | -                                                | -                                                |
| <b>9</b>  | 6.88, q, 1.4                                     | -                                                |
| <b>10</b> | -                                                | 8.17, d, 8.1                                     |
| <b>11</b> | -                                                | 8.31, dd, 8.1, 1.7                               |
| <b>12</b> | -                                                | 2.20, d, 1.6                                     |
| <b>13</b> | 8.07, d, 8.0                                     | -                                                |
| <b>14</b> | 7.79, dd, 8.0, 1.8                               | -                                                |
| <b>15</b> | 0.95, d, 7.1                                     | -                                                |

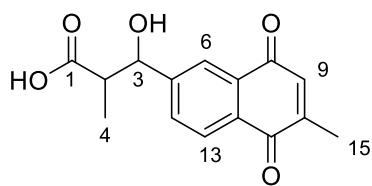

**(6)**

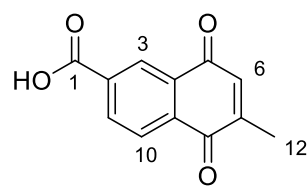

**(7)**

**Table S4.**  $^1\text{H}$  and  $^{13}\text{C}$  NMR (500/125 MHz) data of Compound **10** ( $\text{CD}_3\text{OD}$ ).

| N° | <b>10</b><br>$^1\text{H}$ , mult, $J = \text{Hz}$ | <b>10</b><br>$^{13}\text{C}$ |
|----|---------------------------------------------------|------------------------------|
| 1  |                                                   | 168.5                        |
| 2  | 5.90, dd, 15.6, 1.5                               | 124.5                        |
| 3  | 7.02, ddd, 15.5, 7.3, 7.3                         | 147.8                        |
| 4  | 2.44, m; 2.34, m                                  | 41.1                         |
| 5  | 3.91, m                                           | 70.1                         |
| 6  | 1.61, m                                           | 44.9                         |
| 7  | 3.76, m                                           | 71.1                         |
| 8  | 1.38, m; 1.51, m                                  | 38.8                         |
| 9  | 1.50, m                                           | 23.0                         |
| 10 | 1.38, m; 1.51, m                                  | 38.5                         |
| 11 | 3.50, m                                           | 72.9                         |
| 12 | 1.57, m; 1.43, m                                  | 36.3                         |
| 13 | 1.67, m; 1.30, m                                  | 31.9                         |
| 14 | 2.24, qd, 7.0, 2.8                                | 36.2                         |
| 15 | 4.67, d, 2.8                                      | 75.8                         |
| 16 | -                                                 | 210.6                        |
| 17 | -                                                 | 99.5                         |
| 18 | 2.07, ddd, 13.3, 4.7, 1.6<br>1.33, dd, 12.2, 11.9 | 41.2                         |
| 19 | 4.08, m                                           | 64.9                         |
| 20 | 1.93, m ; 1.23, m                                 | 42.1                         |
| 21 | 4.18, m                                           | 67.8                         |
| 22 | 1.64, m; 1.57, m                                  | 45.6                         |
| 23 | 4.06, m                                           | 65.5                         |
| 24 | 1.57, m                                           | 46.0                         |
| 25 | 4.04, m                                           | 68.3                         |
| 26 | 1.53, m                                           | 46.0                         |
| 27 | 3.76, m                                           | 71.5                         |
| 28 | 1.57, m; 1.44, m                                  | 38.7                         |
| 29 | 1.50, m; 1.34, m                                  | 22.7                         |
| 30 | 1.51, m; 1.38, m                                  | 38.6                         |
| 31 | 3.94, m                                           | 72.4                         |
| 32 | 5.53, dd, 15.5, 4.5                               | 135.2                        |
| 33 | 5.49, 15.5, 7.0                                   | 133.0                        |
| 34 | 2.51, ddd, 9.5, 6.9, 6.9                          | 40.5                         |
| 35 | 5.14, dd, 9.6, 1.8                                | 77.3                         |
| 36 | 1.94, m                                           | 38.7                         |
| 37 | 3.39, dd, 9.6, 2.0                                | 78.7                         |
| 38 | 1.83, m                                           | 36.0                         |
| 39 | 3.58, dd, 9.4, 2.0                                | 81.5                         |
| 40 | 1.76, m                                           | 42.5                         |
| 41 | 3.66, ddd, 8.8, 5.9, 2.5                          | 76.3                         |
| 42 | 1.57, m; 1.32, m                                  | 26.3                         |
| 43 | 0.96, t, 7.4                                      | 10.5                         |
| 44 | 0.78, d, 6.9                                      | 13.6                         |
| 45 | 1.02, d, 6.8                                      | 17.3                         |
| 46 | 0.88, d, 6.9                                      | 9.7                          |
| 47 | 0.89, d, 6.9                                      | 4.6                          |
| 48 | 0.76, d, 7.0                                      | 11.8                         |

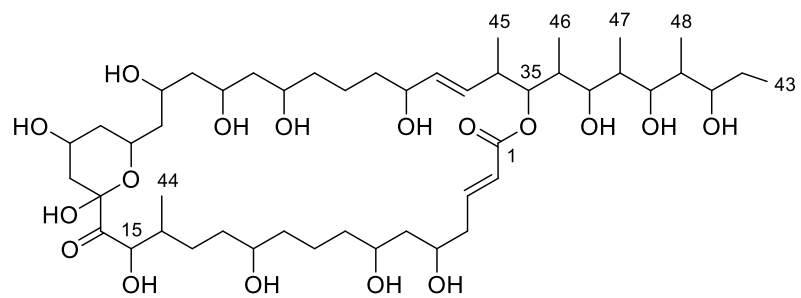

(10)



**Table S5.**  $^1\text{H}$  and  $^{13}\text{C}$  NMR (500/125 MHz) data of Compounds **11** and **12** ( $\text{CD}_3\text{OD}$ ).

| N°        | <b>11</b><br>$^1\text{H}$ , mult, $J = \text{Hz}$ | <b>11</b><br>$^{13}\text{C}$ | <b>12</b><br>$^1\text{H}$ , mult, $J = \text{Hz}$ | <b>12</b><br>$^{13}\text{C}$ | N°        | <b>11</b><br>$^1\text{H}$ , mult, $J = \text{Hz}$ | <b>11</b><br>$^{13}\text{C}$ | <b>12</b><br>$^1\text{H}$ , mult, $J = \text{Hz}$ | <b>2</b><br>$^{13}\text{C}$ |
|-----------|---------------------------------------------------|------------------------------|---------------------------------------------------|------------------------------|-----------|---------------------------------------------------|------------------------------|---------------------------------------------------|-----------------------------|
| <b>1</b>  | -                                                 | 168.6                        | -                                                 | 168.6                        | <b>42</b> | 1.62, m; 1.39, m                                  | 22.8                         | 1.62, m; 1.40, m                                  | 23.0                        |
| <b>2</b>  | 5.91, ddd, 15.7, 1.5, 1.5                         | 124.5                        | 5.91, ddd, 15.7, 1.5, 1.5                         | 124.5                        | <b>43</b> | 0.98, t, 7.3                                      | 11.6                         | 0.9, t, 7.4                                       | 11.7                        |
| <b>3</b>  | 7.02, ddd, 15.0, 7.3, 7.3                         | 147.9                        | 7.02, ddd, 15.0, 7.3, 7.3                         | 147.9                        | <b>44</b> | 0.78, d, 6.9                                      | 13.6                         | 0.82, d, 6.8                                      | 13.9                        |
| <b>4</b>  | 2.45, m; 2.34, m                                  | 41.1                         | 2.45, m; 2.34, m                                  | 41.1                         | <b>45</b> | 1.01, d, 6.8                                      | 17.3                         | 1.01, d, 6.8                                      | 17.1                        |
| <b>5</b>  | 3.92, m                                           | 70.1                         | 3.92, m                                           | 70.1                         | <b>46</b> | 0.88, d, 6.9                                      | 9.7                          | 0.88, d, 6.9                                      | 9.7                         |
| <b>6</b>  | 1.61, m                                           | 44.9                         | 1.61, m                                           | 44.9                         | <b>47</b> | 0.89, d, 7.0                                      | 5.0                          | 0.89, d, 6.9                                      | 5.0                         |
| <b>7</b>  | 3.74, m                                           | 71.4                         | 3.76, m                                           | 71.0                         | <b>48</b> | 0.77, d, 6.9                                      | 10.7                         | 0.77, d, 6.9                                      | 10.6                        |
| <b>8</b>  | 1.51, m; 1.38, m                                  | 38.7                         | 1.51, m; 1.38, m                                  | 38.7                         | <b>1'</b> | 4.99, d, 3.8                                      | 96.5                         | 4.99, d, 3.7                                      | 96.4                        |
| <b>9</b>  | 1.62, m; 1.40, m                                  | 23.0                         | 1.62, m; 1.40, m                                  | 23.0                         | <b>2'</b> | 1.98, m; 1.53, dd, 14.0, 3.0                      | 37.0                         | 1.97, m; 1.63, m                                  | 37.0                        |
| <b>10</b> | 1.51, m; 1.38, m                                  | 38.6                         | 1.51, m; 1.38, m                                  | 38.6                         | <b>3'</b> | -                                                 | 71.7                         | -                                                 | 71.7                        |
| <b>11</b> | 3.52, m                                           | 72.6                         | 3.52, m                                           | 72.6                         | <b>4'</b> | 3.03, br s                                        | 75.3                         | 3.03, br s                                        | 75.3                        |
| <b>12</b> | 1.51, m; 1.38, m                                  | 36.2                         | 1.51, m; 1.38, m                                  | 36.2                         | <b>5'</b> | 4.41, br q, 6.6                                   | 64.5                         | 4.41, br q, 6.8                                   | 65.2                        |
| <b>13</b> | 1.66, m; 1.30, m                                  | 31.5                         | 1.67, m; 1.31, m                                  | 31.5                         | <b>6'</b> | 1.18, d, 7.0                                      | 17.1                         | 1.18, d, 6.8                                      | 17.7                        |
| <b>14</b> | 2.23, qd, 6.9, 2.8                                | 36.3                         | 2.20, qd, 6.9, 3.4                                | 36.2                         | <b>7'</b> | 1.19, s                                           | 26.8                         | 1.19, s                                           | 26.8                        |
| <b>15</b> | 4.67, d, 2.8                                      | 75.8                         | 4.60, d, 3.4                                      | 75.5                         |           |                                                   |                              |                                                   |                             |
| <b>16</b> | -                                                 | 210.6                        | -                                                 | 208.7                        |           |                                                   |                              |                                                   |                             |
| <b>17</b> | -                                                 | 99.4                         | -                                                 | 99.7                         |           |                                                   |                              |                                                   |                             |
| <b>18</b> | 2.07, ddd, 12.4, 4.4, 1.6; 1.34, m                | 41.1                         | 3.50, m                                           | 75.4                         |           |                                                   |                              |                                                   |                             |
| <b>19</b> | 4.07, m                                           | 65.0                         | 3.87, m                                           | 69.7                         |           |                                                   |                              |                                                   |                             |
| <b>20</b> | 1.94, m; 1.22, m                                  | 42.1                         | 1.97, m; 1.43, m                                  | 41.0                         |           |                                                   |                              |                                                   |                             |
| <b>21</b> | 4.19, dd, 11.9, 9.3                               | 67.8                         | 4.23, dd, 11.9, 9.1                               | 67.5                         |           |                                                   |                              |                                                   |                             |
| <b>22</b> | 1.63, m                                           | 46.4                         | 1.63, m                                           | 46.3                         |           |                                                   |                              |                                                   |                             |
| <b>23</b> | 4.06, m                                           | 65.5                         | 4.00, m                                           | 65.7                         |           |                                                   |                              |                                                   |                             |
| <b>24</b> | 1.57, m                                           | 46.0                         | 1.57, m                                           | 45.8                         |           |                                                   |                              |                                                   |                             |
| <b>25</b> | 4.04, m                                           | 68.3                         | 4.02, m                                           | 68.4                         |           |                                                   |                              |                                                   |                             |
| <b>26</b> | 1.53, m                                           | 45.6                         | 1.53, m                                           | 45.1                         |           |                                                   |                              |                                                   |                             |
| <b>27</b> | 3.76, m                                           | 71.5                         | 3.74, m                                           | 71.4                         |           |                                                   |                              |                                                   |                             |
| <b>28</b> | 1.57, m; 1.44, m                                  | 38.6                         | 1.57, m; 1.44, m                                  | 38.6                         |           |                                                   |                              |                                                   |                             |
| <b>29</b> | 1.51, m                                           | 22.7                         | 1.51, m                                           | 22.8                         |           |                                                   |                              |                                                   |                             |
| <b>30</b> | 1.51, m; 1.38, m                                  | 38.6                         | 1.51, m; 1.38, m                                  | 38.7                         |           |                                                   |                              |                                                   |                             |
| <b>31</b> | 3.93, m                                           | 72.4                         | 3.94, m                                           | 72.5                         |           |                                                   |                              |                                                   |                             |
| <b>32</b> | 5.51, dd, 15.4, 4.5                               | 135.2                        | 5.52, dd, 15.5, 4.5                               | 135.2                        |           |                                                   |                              |                                                   |                             |
| <b>33</b> | 5.49, dd, 15.4, 7.0                               | 133.0                        | 5.49, dd, 15.5, 7.0                               | 133.1                        |           |                                                   |                              |                                                   |                             |
| <b>34</b> | 2.52, ddd, 9.7, 6.9, 6.9                          | 40.5                         | 2.51, m                                           | 40.5                         |           |                                                   |                              |                                                   |                             |
| <b>35</b> | 5.13, dd, 9.6, 1.8                                | 77.4                         | 5.14, dd, 9.5, 1.8                                | 77.4                         |           |                                                   |                              |                                                   |                             |
| <b>36</b> | 2.00, m                                           | 38.7                         | 1.99, m                                           | 38.8                         |           |                                                   |                              |                                                   |                             |
| <b>37</b> | 3.37, dddd, 9.4, 1.8, 0.6, 0.6                    | 78.5                         | 3.37, dd, 9.6, 2.1                                | 78.5                         |           |                                                   |                              |                                                   |                             |
| <b>38</b> | 1.81, m                                           | 36.1                         | 1.81, m                                           | 36.2                         |           |                                                   |                              |                                                   |                             |
| <b>39</b> | 3.50, m                                           | 79.5                         | 3.50, m                                           | 79.5                         |           |                                                   |                              |                                                   |                             |
| <b>40</b> | 2.00, m                                           | 38.8                         | 2.01, m                                           | 38.8                         |           |                                                   |                              |                                                   |                             |
| <b>41</b> | 3.87, ddd, 9.6, 3.1, 3.1                          | 80.3                         | 3.87, m                                           | 80.3                         |           |                                                   |                              |                                                   |                             |

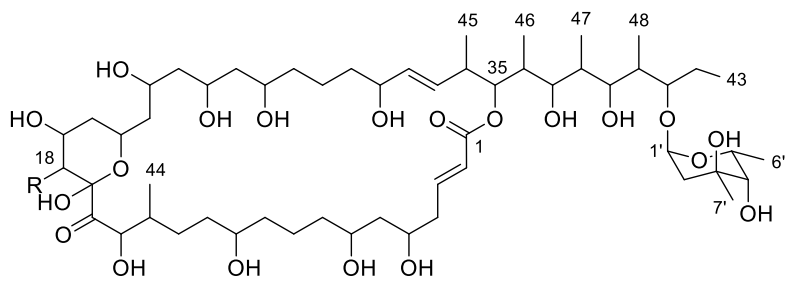

(11) R = H  
 (12) R = OH
