# Supplementary material for: Elucidation of the glycosylation steps during biosynthesis of antitumor macrolides PM100117 and PM100118 and engineering for novel derivatives
Source: PubMed Central journal article supplement (PMC5103430; doi:10.1186/s12934-016-0591-7), 2016-11-09
Supplement: 12934_2016_591_MOESM4_ESM.pdf [file 12934_2016_591_MOESM4_ESM.pdf]

**Table S6.** Primers and plasmids used in this work

| Primer               | Sequence (5'-3')                                | PCR product and purpose                                       | Plasmid |
|----------------------|-------------------------------------------------|---------------------------------------------------------------|---------|
| <b>Gene deletion</b> |                                                 |                                                               |         |
| <b>NsiI-CM</b>       | TATA <b><u>ATGCAT</u></b> AGTTGTCCCCGTACATCAGC  | 2,167-bp upstream flanking region for <i>gonCM</i> deletion   | pDgonCM |
| <b>SpeI-CM</b>       | TATA <b><u>ACTAGT</u></b> TAGGTCTCGACGGCCTTGTA  |                                                               |         |
| <b>EcoRV-CM</b>      | TATA <b><u>GATATC</u></b> CCTTTCTTGGTCGTGAAGGT  | 2,099-bp downstream flanking region for <i>gonCM</i> deletion |         |
| <b>NdeI-CM</b>       | TATA <b><u>CATATG</u></b> CCCGAACTCTCCATCGTCT   |                                                               |         |
| <b>NsiI-D3</b>       | TATA <b><u>ATGCAT</u></b> GACGTGCTCCTGGTGGTACT  | 2,072-bp upstream flanking region for <i>gonD3</i> deletion   | pDgonD3 |
| <b>SpeI-D3</b>       | TATA <b><u>ACTAGT</u></b> GAGGACACCGTTCGTGGTT   |                                                               |         |
| <b>EcoRV-D3</b>      | TATA <b><u>GATATC</u></b> CACGAGTACGCCCCACAG    | 2,106-bp downstream flanking region for <i>gonD3</i> deletion |         |
| <b>BamHI-D3</b>      | TATA <b><u>GGATCC</u></b> TACCGAGTTCGTTCTCTCC   |                                                               |         |
| <b>NsiI-E</b>        | TATA <b><u>ATGCAT</u></b> TCCTGCAATGGTGAGAAGAA  | 2,270-bp upstream flanking region for <i>gonE</i> deletion    | pDgonE  |
| <b>SpeI-E</b>        | TATA <b><u>ACTAGT</u></b> CGCTGTCTGACGATGGAGTA  |                                                               |         |
| <b>EcoRV-E</b>       | TATA <b><u>GATATC</u></b> TCACACCATTCTGCTTCTCG  | 2,255-bp downstream flanking region for <i>gonE</i> deletion  |         |
| <b>BamHI-E</b>       | TATA <b><u>GGATCC</u></b> TCCGTGACTGATGAGGACA   |                                                               |         |
| <b>SpeI-R1</b>       | TATA <b><u>ACTAGT</u></b> GTGACCTACCTCCGCAGAG   | 2,147-bp upstream flanking region for <i>gonR1</i> deletion   | pDgonR1 |
| <b>NsiI-R1</b>       | TATA <b><u>ATGCAT</u></b> GTGAGGTCATCGGGAAGA    |                                                               |         |
| <b>BamHI-R1</b>      | TATA <b><u>GGATCC</u></b> CCGCAGCATCGACAGTTC    | 2,021-bp downstream flanking region for <i>gonR1</i> deletion |         |
| <b>EcoRV-R1</b>      | TATA <b><u>GATATC</u></b> TACATCTTCTCGCACGTTGG  |                                                               |         |
| <b>NsiI-R2</b>       | TATA <b><u>ATGCAT</u></b> ACTGCACGTTGGTGTAGTGC  | 1,981-bp upstream flanking region for <i>gonR2</i> deletion   | pDgonR2 |
| <b>SpeI-R2</b>       | TATA <b><u>ACTAGT</u></b> GCTGATGTACGGGGACAAC   |                                                               |         |
| <b>EcoRV-R2</b>      | TATA <b><u>GATATC</u></b> CACAGCCTTTAGGCGTGTGT  | 2,277-bp downstream flanking region for <i>gonR2</i> deletion |         |
| <b>BamHI-R2</b>      | TATA <b><u>GGATCC</u></b> GGGTGAGGTCCACAGCAG    |                                                               |         |
| <b>SpeI-G1</b>       | TATA <b><u>ACTAGT</u></b> CTAACCGCCGTCGTACATCT  | 2,219-bp upstream flanking region for <i>gonG1</i> deletion   | pDgonG1 |
| <b>NsiI-G1</b>       | TATA <b><u>ATGCAT</u></b> GTCTCATCCTGTGGTCTGTGG |                                                               |         |
| <b>BamHI-G1</b>      | TATA <b><u>GGATCC</u></b> GGGATCTACACCCACCACAG  | 2,016-bp downstream flanking region for <i>gonG1</i> deletion |         |
| <b>EcoRV-G1</b>      | TATA <b><u>GATATC</u></b> CAGGAGATGGGTGACGAACAG |                                                               |         |

**Table S1.** Primers and plasmids used in this work (continued)

| Primer                                          | Sequence (5'-3')                         | PCR product and purpose                                                                         | Plasmid         |
|-------------------------------------------------|------------------------------------------|-------------------------------------------------------------------------------------------------|-----------------|
| <b>Gene deletion</b>                            |                                          |                                                                                                 |                 |
| <b>SpeI-G2</b>                                  | TATA <u>ACTAGT</u> TGTCGACCGTTCCATACTCA  | 2,033-bp upstream flanking region for <i>gonG2</i> deletion                                     | pD <i>gonG2</i> |
| <b>NsiI-G2</b>                                  | TATA <u>ATGCAT</u> TGTAGTGGTGGTCGACGAAG  |                                                                                                 |                 |
| <b>BglII-G2</b>                                 | TATA <u>AGATCT</u> GGCCTGTTGGAGCAGTGG    |                                                                                                 |                 |
| <b>EcoRV-G2</b>                                 | TATA <u>GATATC</u> AGAGAGCCCTCCCTCATCTC  | 2,079-bp downstream flanking region for <i>gonG2</i> deletion                                   |                 |
| <b>XbaI-G3</b>                                  | TATA <u>TCTAGA</u> CCACACGGAATGAGGAGATT  | 2,110-bp upstream flanking region for <i>gonG3</i> deletion                                     | pD <i>gonG3</i> |
| <b>NsiI-G3</b>                                  | TATA <u>ATGCAT</u> ACTGCACCATGACCAGTGAC  |                                                                                                 |                 |
| <b>NdeI-G3</b>                                  | TATA <u>CATATG</u> CGGCCGAACATACTGGAATCT |                                                                                                 |                 |
| <b>EcoRV-G3</b>                                 | TATA <u>GATATC</u> ACGAGATCACCTCGCATCTT  | 2,385-bp downstream flanking region for <i>gonG3</i> deletion                                   |                 |
| <b>SpeI-G4</b>                                  | TATA <u>ACTAGT</u> GGGCACCTTGAAATAGGACA  | 2,000-bp upstream flanking region for <i>gonG4</i> deletion                                     | pD <i>gonG4</i> |
| <b>NsiI-G4</b>                                  | TATA <u>ATGCAT</u> CATGTGAAGGTATCGGCTCA  |                                                                                                 |                 |
| <b>BamHI-G4</b>                                 | TATA <u>GGATCC</u> CACAGCCTTTAGGCGTGTGT  |                                                                                                 |                 |
| <b>EcoRV-G4</b>                                 | TATA <u>GATATC</u> CCTCACAGATGGTCCTCGAC  | 2,331-bp downstream flanking region for <i>gonG4</i> deletion                                   |                 |
| <b>Mutant complementation (over-expression)</b> |                                          |                                                                                                 |                 |
| <b>EcoRV-cCM</b>                                | TATA <u>GATATC</u> GCTGTGTCTGCCTCAGTATGG | 1,426-bp fragment containing <i>gonCM</i> (-109 bp from start codon) for mutant complementation | pC <i>gonCM</i> |
| <b>BamHI-cCM</b>                                | TATA <u>GGATCC</u> TAAGGTCGCCGGCAGATAC   |                                                                                                 |                 |
| <b>EcoRV-cD3</b>                                | TATA <u>GATATC</u> GGCCTGTTGGAGCAGTGG    | 1,466-bp fragment containing <i>gonD3</i> (-32 bp from start codon) for mutant complementation  | pC <i>gonD3</i> |
| <b>BamHI-cD3</b>                                | TATA <u>GGATCC</u> GGCAGGACACTCACAGGAG   |                                                                                                 |                 |
| <b>EcoRV-cE</b>                                 | TATA <u>GATATC</u> GATCGCGAGGACTTCGTTC   | 875-bp fragment containing <i>gonE</i> (-106 bp from start codon) for mutant complementation    | pC <i>gonE</i>  |
| <b>BamHI-cE</b>                                 | TATA <u>GGATCC</u> CGAAAACGTGAGTGACATGAG |                                                                                                 |                 |
| <b>EcoRV-cR2</b>                                | TATA <u>GATATC</u> CCTTGCGGATGGGTATCTC   | 1,083-bp fragment containing <i>gonR2</i> (-88 bp from start codon) for over-expression         | pC <i>gonR2</i> |
| <b>BamHI-cR2</b>                                | TATA <u>GGATCC</u> CCTCCGTGACTGATGAGGACA |                                                                                                 |                 |

**Table S1.** Primers and plasmids used in this work (continued)

| Primer                                          | Sequence (5'-3')                         | PCR product and purpose                                                                         | Plasmid         |
|-------------------------------------------------|------------------------------------------|-------------------------------------------------------------------------------------------------|-----------------|
| <b>Mutant complementation (over-expression)</b> |                                          |                                                                                                 |                 |
| <b>BglIII-cG1</b>                               | TATA <u>AGATCT</u> CCACAGACCACAGGATGAGA  | 1,436-bp fragment containing <i>gonG1</i> (-100 bp from start codon) for mutant complementation | pC <i>gonG1</i> |
| <b>EcoRV-cG1</b>                                | TATA <u>GATATC</u> CACAAGAGCCTTCACGGTTT  |                                                                                                 |                 |
| <b>BamHI-cG2</b>                                | TATA <u>GGATCCC</u> GAGTGAAGGTGTCGATGTG  | 1,357-bp fragment containing <i>gonG2</i> (-107 bp from start codon) for mutant complementation | pC <i>gonG2</i> |
| <b>EcoRV-cG2</b>                                | TATA <u>GATATC</u> TCACCGAGTTCGTTCTCTCC  |                                                                                                 |                 |
| <b>BglIII-cG3</b>                               | TATA <u>AGATCT</u> TAGTCATTCAGCACCGTCGT  | 1,429-bp fragment containing <i>gonG3</i> (-92 bp from start codon) for mutant complementation  | pC <i>gonG3</i> |
| <b>EcoRV-cG3</b>                                | TATA <u>GATATC</u> ACCTGACGCCACCCTATTC   |                                                                                                 |                 |
| <b>BamHI-cG4</b>                                | TATA <u>GGATCCC</u> GGTGAAAGAGCTTGGAGTGC | 1,209-bp fragment containing <i>gonG4</i> (-24 bp from start codon) for over-expression         | pC <i>gonG4</i> |
| <b>EcoRV-cG4</b>                                | TATA <u>GATATC</u> CTAGGGCGAACACGACCTCT  |                                                                                                 |                 |
| <b>NcoI-dHG<sup>R</sup></b>                     | TATA <u>CCATGG</u> CATCAGCAAAGGGGATGAT   | 1,635-bp fragment containing <i>hygR</i> gene from pDR4                                         | pSETH           |
| <b>NcoI-rvHG<sup>R</sup></b>                    | TATA <u>CCATGG</u> ATCGAAGAGAAGCAGGACGA  |                                                                                                 |                 |
| <b>Mutant confirmation</b>                      |                                          |                                                                                                 |                 |
| <i>cfCM</i>                                     | CATCGTGGTGGTCTTACCG                      | used with ApraII for confirmation of <i>gonCM</i> deletion                                      |                 |
| <i>cfD3</i>                                     | GCCGTATGGCTGTGTTCTC                      | used with ApraII for confirmation of <i>gonD3</i> deletion                                      |                 |
| <i>cfE</i>                                      | AACTTCACCACATCGCACAG                     | used with ApraII for confirmation of <i>gonE</i> deletion                                       |                 |
| <i>cfR1</i>                                     | CAAGCCGATCCTCTTCTACG                     | used with Apra60 for confirmation of <i>gonR1</i> deletion                                      |                 |
| <i>cfG1</i>                                     | GTACGGCACCTCCTGCTG                       | used with Apra60 for confirmation of <i>gonG1</i> deletion                                      |                 |
| <i>cfG2</i>                                     | ACTACGTCCGTACGCTCCTG                     | used with Apra60 for confirmation of <i>gonG2</i> deletion                                      |                 |

**Table S1.** Primers and plasmids used in this work (continued)

| Primer                     | Sequence (5'-3')     | PCR product and purpose                            | Plasmid |
|----------------------------|----------------------|----------------------------------------------------|---------|
| <b>Mutant confirmation</b> |                      |                                                    |         |
| cfG3                       | TGCAGCACCTCAAGAGAGAA | used with Apra60 for confirmation of gonR3deletion |         |
| cfG4                       | GTGAAACCGAGTTGATGCAG | used with Apra60 for confirmation of gonG4deletion |         |
| Apra60                     | CCAAGGTTGAGAAGCTGACC | reverse primer annealing <i>aac(3)IV</i>           |         |
| ApraII                     | CTTCAGGATGGCAAGTTGGT | forward primer annealing <i>aac(3)IV</i>           |         |

**Mutant confirmation by PCR**

Gene deletion in *S. caniferus* GUA-06-05-006A was confirmed by colony PCR by using the procedure described in [1] with the following modifications. Colonies of *S. caniferus* GUA-06-05-006A mutants were suspended in 50 µl of 0.2M TES buffer, pH 7.5, with 1 µl lysozyme (50 mg/ml) and incubated for 40 min at 30°C. The mix was centrifuged (10000 x g, 2 min) and the pellet thoroughly suspended in 10 µl DMSO. The resulting suspension (2 µl) was used as PCR template with the primer pairs described in Table S6. DNA bands obtained from PCR amplification were analyzed in 0.7% agarose gels. Fig. S5 shows the analysis of two colonies (1 and 2) and a control template (C) consisting in 30 ng of wild type *S. caniferus* GUA-06-05-006A genomic DNA from a pure extract. Band sizes were compared with 0.1 µg of lambda/PstI DNA marker. The expect band size is indicated in red.

**Fig. S5.** Gene deletion confirmation by PCR in mutant strains  $\Delta gonG1$ ,  $\Delta gonG2$ ,  $\Delta gonG3$ ,  $\Delta gonG4$ ,  $\Delta gonR1$ ,  $\Delta gonE$ ,  $\Delta gonCM$  and  $\Delta gonD3$ .

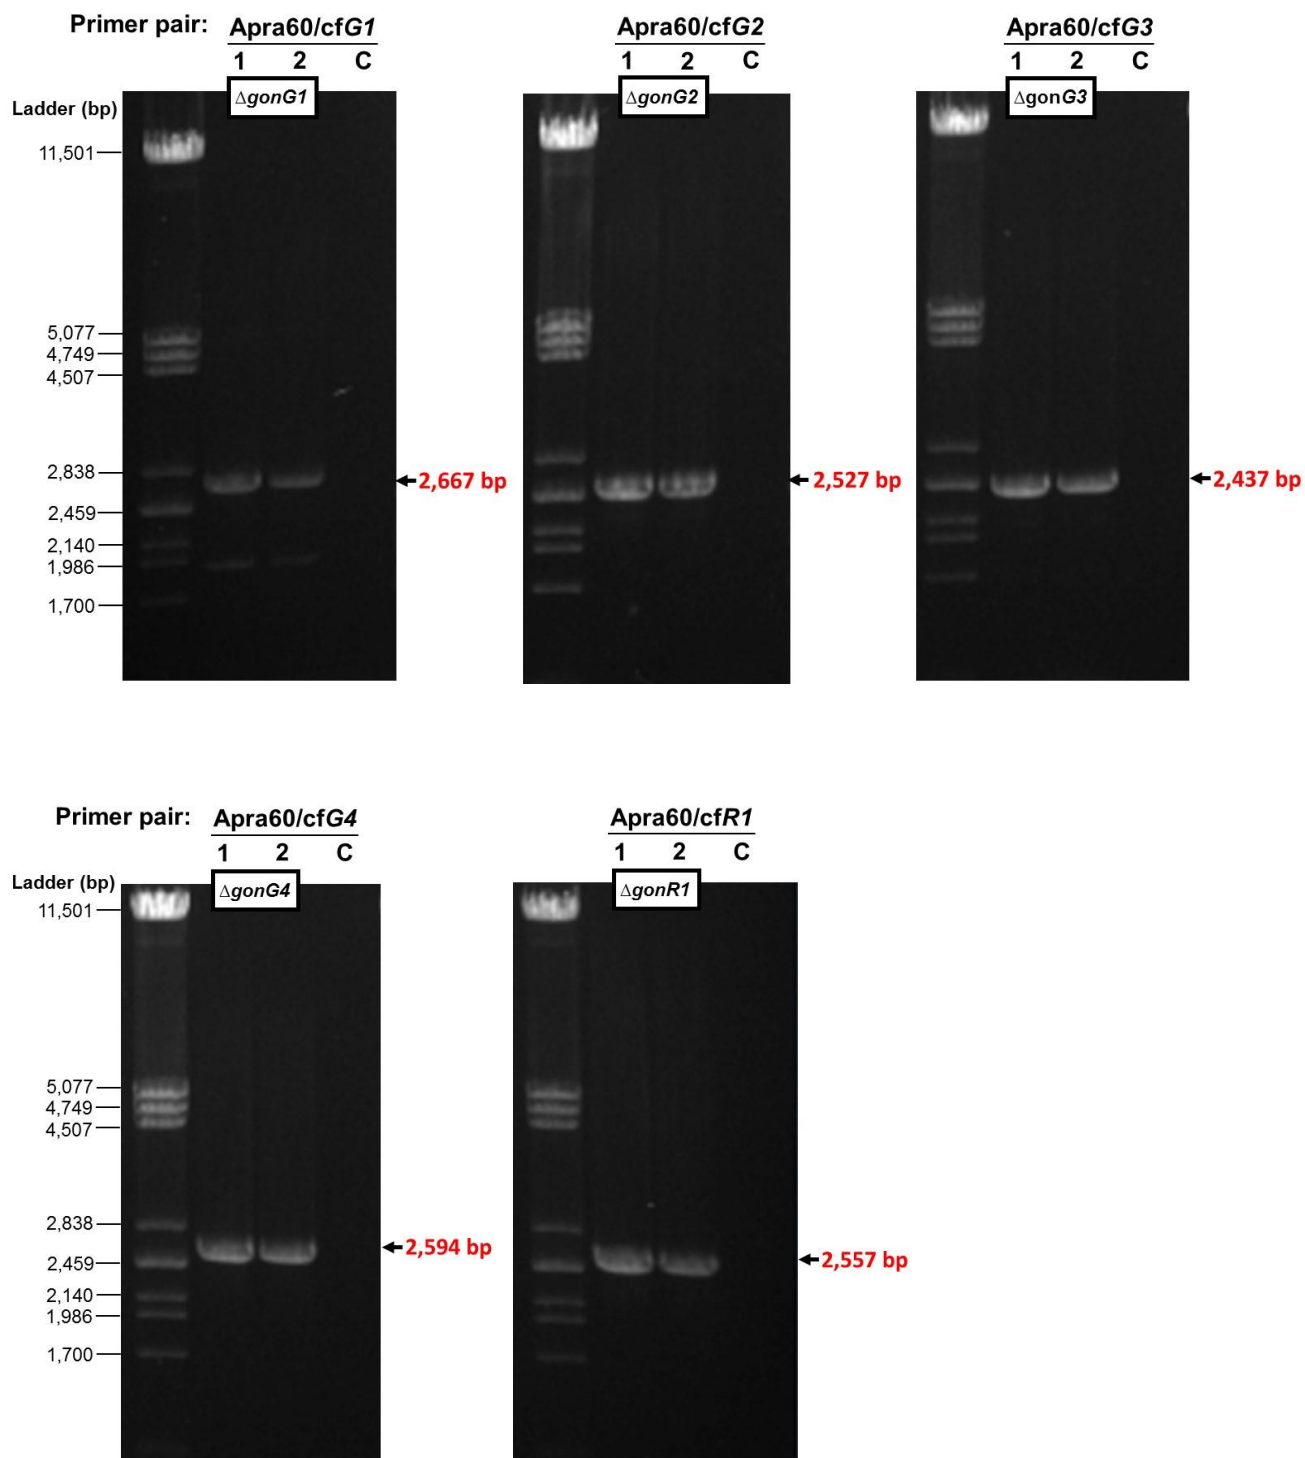

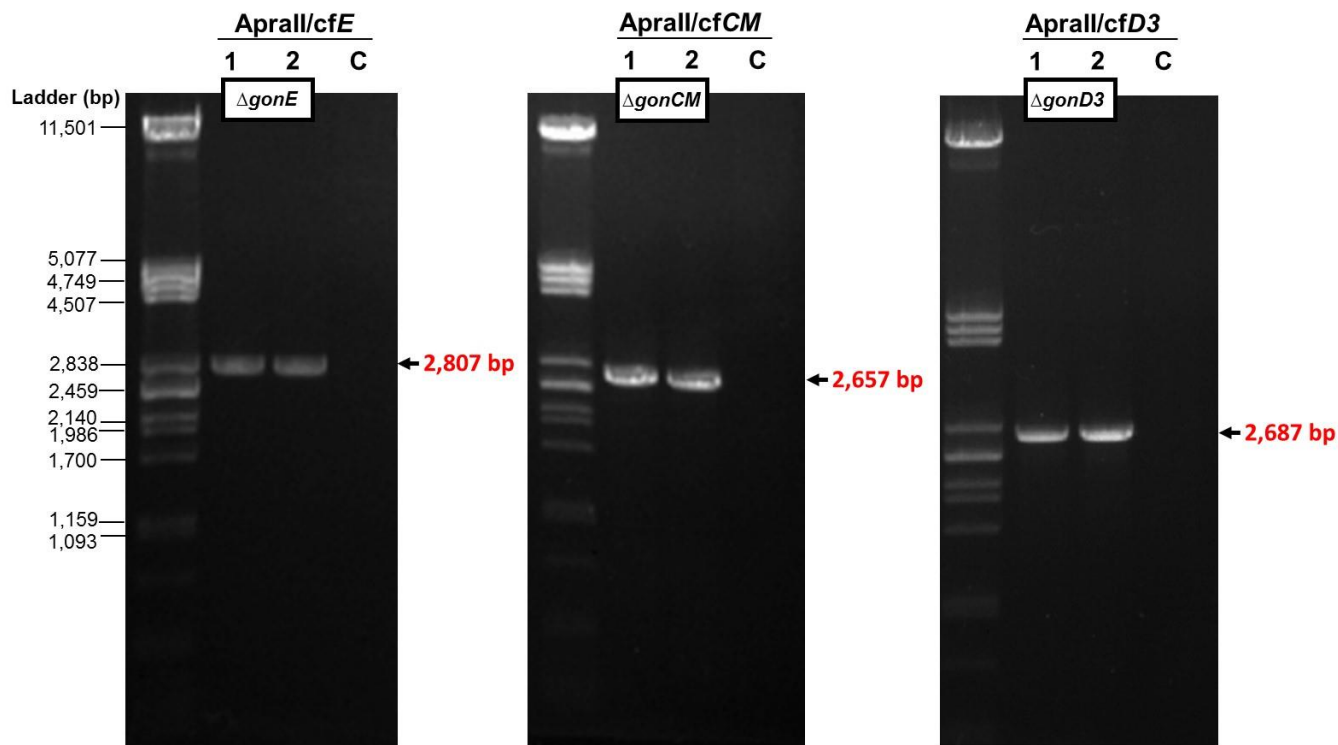

## References

- [1] Van Dessel W, Van Mellaert L, Geukens N, Anné J: **Improved PCR-based method for the direct screening of Streptomyces transformants.** *J Microbiol Methods* 2003 53:401-3.
