# Supplementary material for: Elucidation of the glycosylation steps during biosynthesis of antitumor macrolides PM100117 and PM100118 and engineering for novel derivatives
Source: PubMed Central journal article supplement (PMC5103430; doi:10.1186/s12934-016-0591-7), 2016-11-09

Figure S6. Genetic complementation of mutant strains  $\Delta gonCM$ ,  $\Delta gonD3$ ,  $\Delta gonE$ ,  $\Delta gonG1$ ,  $\Delta gonG2$  and  $\Delta gonG3$ . UPLC analysis of PM100117 (1) and PM100118 (2) production in strains GUA-pSETH, *CgonCM*, *CgonD3*, *CgonE*, *CgonG1*, *CgonG2* and *CgonG3*.

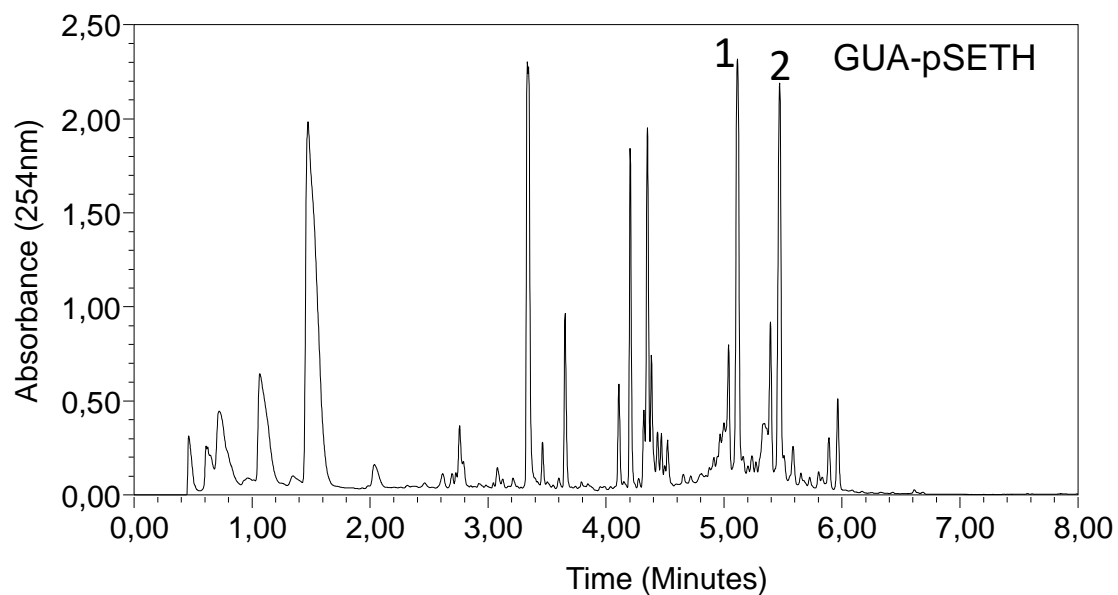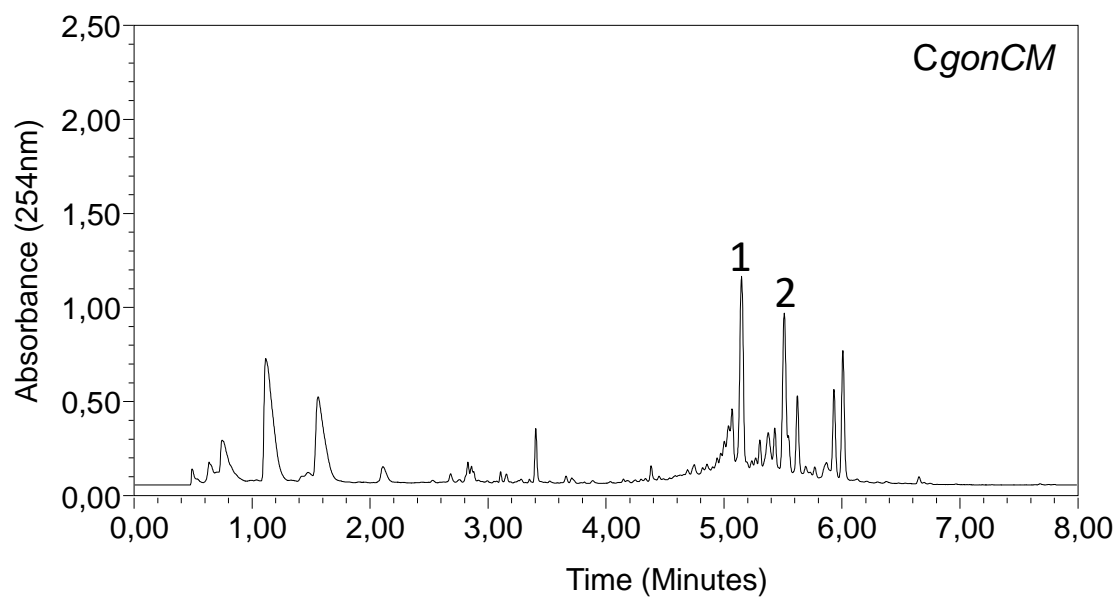

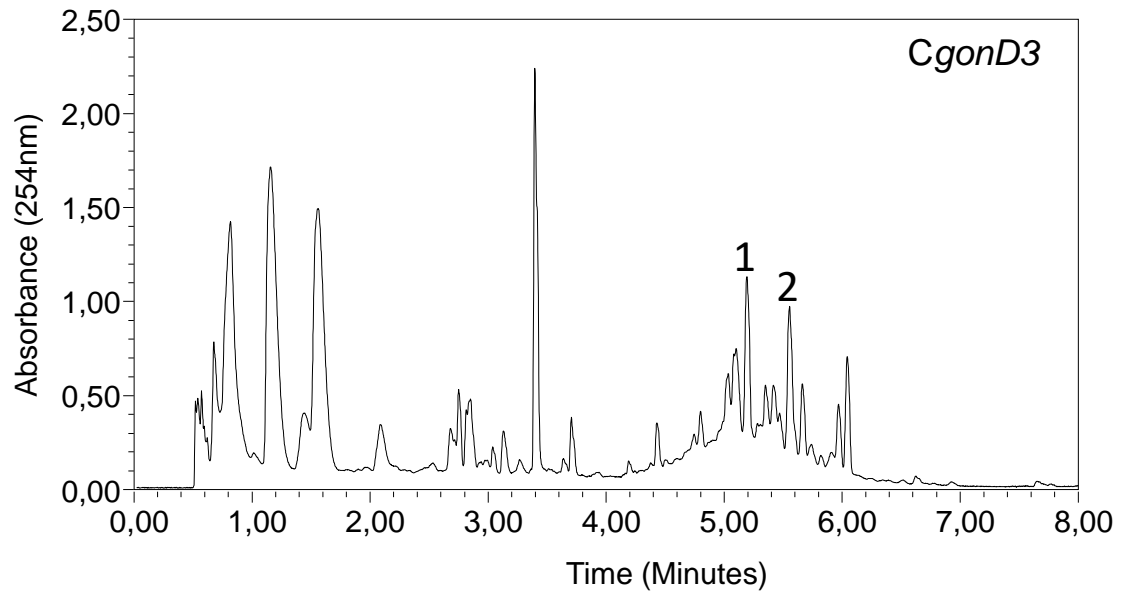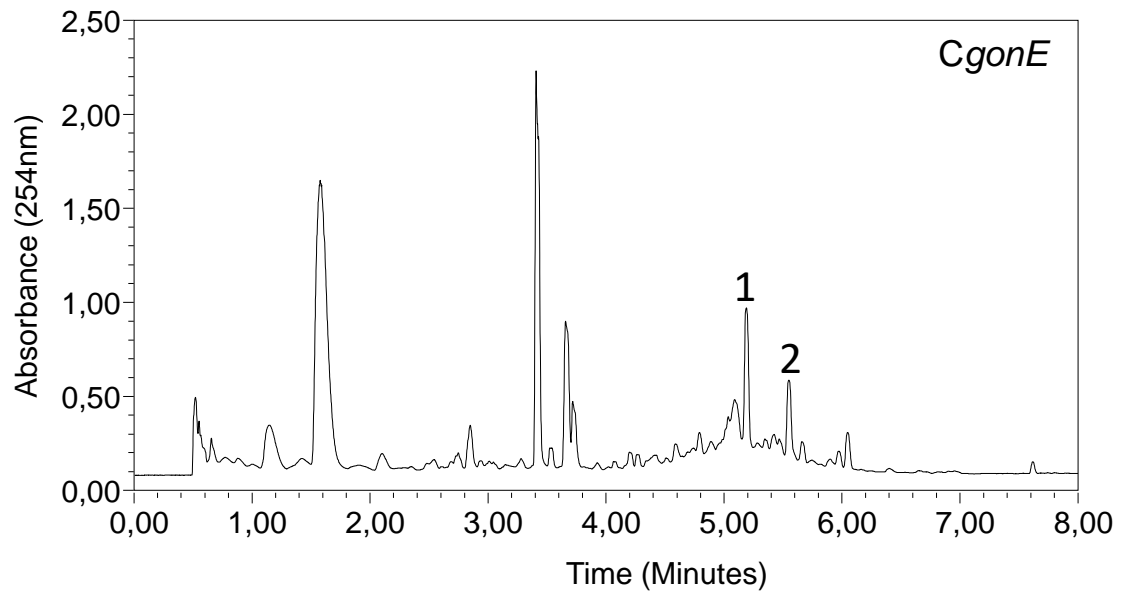

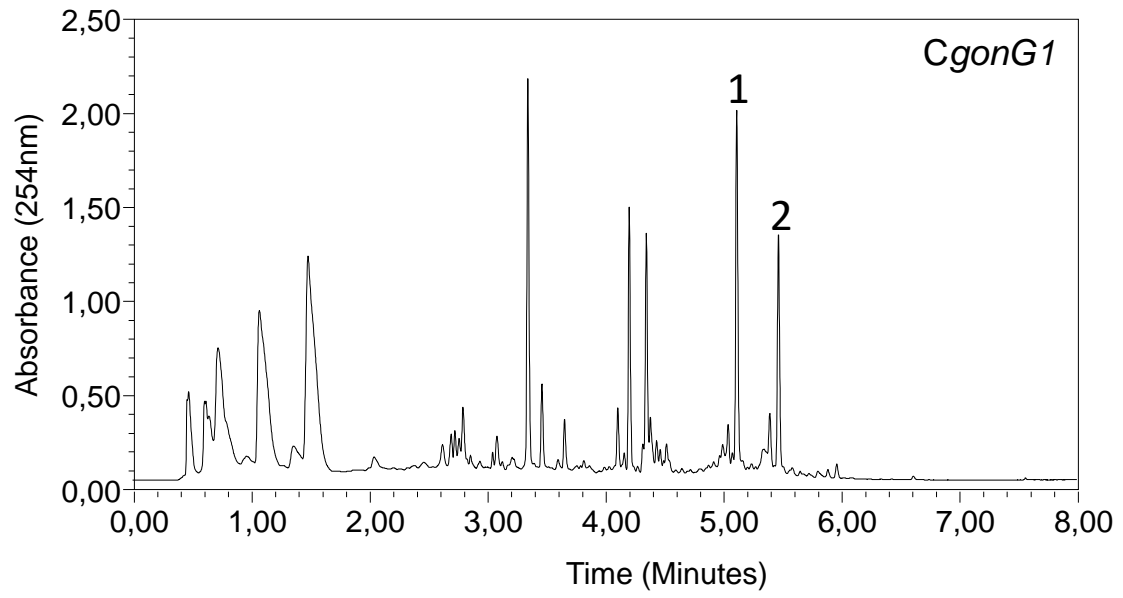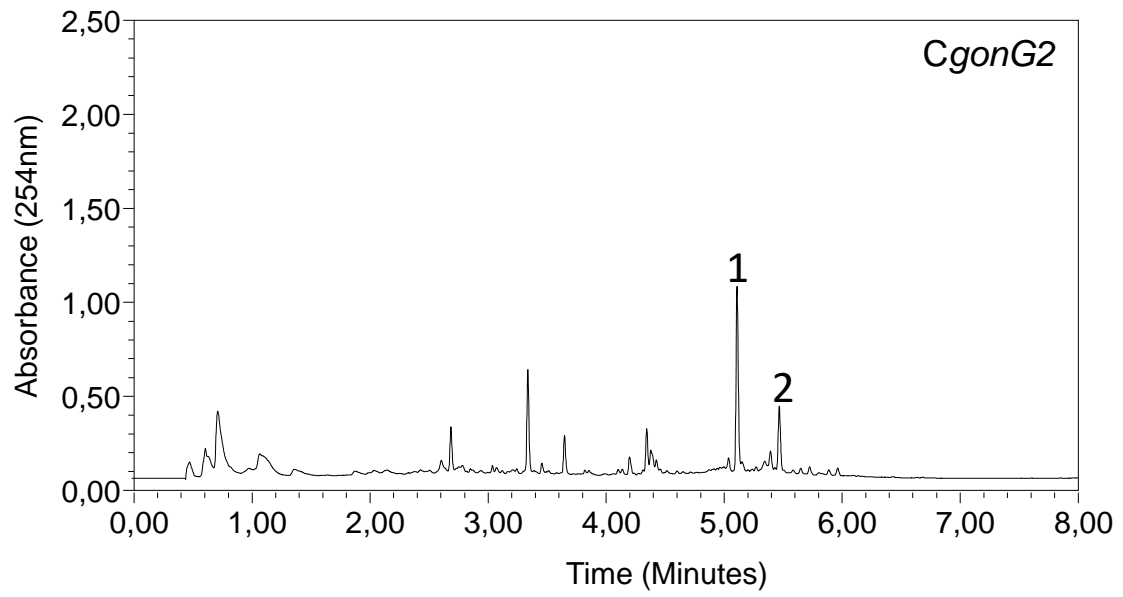

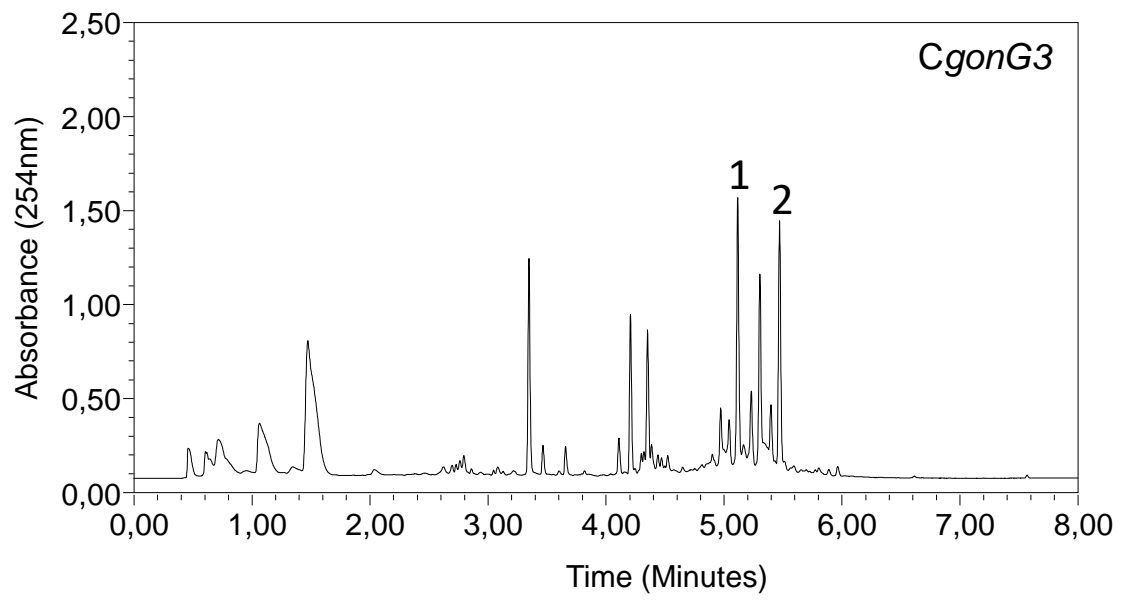

Supplement: 12934_2016_591_MOESM5_ESM.pdf [file 12934_2016_591_MOESM5_ESM.pdf]
